# Supplementary material for: Transcriptomic Analysis of the Regulation of Rhizome Formation in Temperate and Tropical Lotus (Nelumbo nucifera)
Source: PubMed Central journal article supplement (PMC4538393; doi:10.1038/srep13059), 2015-08-17
Supplement: srep13059-s1.pdf [file srep13059-s1.pdf]

## Supplementary Information

### Transcriptomic Analysis of The Regulation of Rhizome Formation in Temperate and Tropical

#### *Lotus (Nelumbonucifera)*

Mei Yang<sup>1</sup>, Lingping Zhu<sup>2,3</sup>, Cheng Pan<sup>1</sup>, Liming Xu<sup>1</sup>, Yanling Liu<sup>2</sup>, Pingfang Yang<sup>1\*</sup>

<sup>1</sup>Key Laboratory of Plant Germplasm Enhancement and Speciality Agriculture, Wuhan Botanical Garden, Chinese Academy of Sciences, Wuhan 430074, Hubei, China

<sup>2</sup>Key Laboratory of Aquatic Plant and Watershed Ecology, Wuhan Botanical Garden, Chinese Academy of Sciences, Wuhan 430074, Hubei, China

<sup>3</sup>University of Chinese Academy of Sciences, Beijing 100049, China

#### **\*Corresponding author:**

Key Laboratory of Plant Germplasm Enhancement and Speciality Agriculture, Wuhan Botanical Garden, Chinese Academy of Sciences, Wuhan 430074, Hubei, China

Pingfang Yang

E-mail: [yangpf@wbgcas.cn](mailto:yangpf@wbgcas.cn)

Fax: 86-27-87510956

## List of Supplementary Materials

**Table S1. Primers used to assay gene expression by RT-qPCR.**

**Table S2. The alignment of novel genes to the annotated genes of the reference lotus genome ('China Antique').**

**Table S3. Comparison of the expression of 14 common genes between our study and the previous study of Cheng et al. <sup>10</sup> who analyzed transcript profiling of lotus rhizome by sequence tag counting technology.**

**Figure S1. GO terms significantly enriched in DEGs in comparisons of RT1, RT2, RT3, ZT1, ZT2, and ZT3 libraries.**

**Figure S2. KEGG pathways significantly enriched in DEGs in comparisons of RT1, RT2, RT3, ZT1, ZT2, and ZT3 libraries.**

**Figure S3. Real-time quantitative RT-qPCR validation of 31 genes expressed at the three stages, T1, T2, and T3, between the two cultivars, 'RL' and 'ZO'. The left y-axis indicates relative gene expression levels determined by RT-qPCR. Data were normalized against a lotus *β-actin* gene (NNU\_24864) and analyzed using the  $2^{-\Delta\Delta C_T}$  Method. The expression values were adjusted by setting the expression of RT1 to be 1 for each gene. All RT-qPCRs for each gene used three biological replicates, with three technical replicates per experiment; the error bars indicate SE. Different lower case letter (a, b, c, d, e) indicates the significant difference among six treatments at  $P = 0.05$ . The correlation coefficient ( $R$ ) between the RT-qPCR and RNA-Seq data is shown for each gene.**

**Table S1. Primers used to assay gene expression by qRT-PCR**

| Gene name           | Gene ID   | Forward primer (5'→3')   | Reverse primer (5'→3')   |
|---------------------|-----------|--------------------------|--------------------------|
| <i>AGL14</i>        | NNU_08433 | GACCCAGATGAAGCGGATAG     | GAGAACCGAAAGCTCAAACG     |
| <i>AGL8</i>         | NNU_04430 | TAGCACAAGAACGAGGATGG     | CAGTTTGGACAATGAAGGGA     |
| <i>AGPase</i>       | NNU_11690 | CCCTACAGAAACCGATAAGC     | AAAGTCAATCCATTGCGAAC     |
| <i>AHP</i>          | NNU_15312 | GAGACCCTCGCCAGTATGTG     | TTCCGAATGGAGAACCCTAA     |
| <i>AHP</i>          | NNU_22191 | TTATGACCTGCTGTTCCACG     | GACCCACATCCATTCTTGCT     |
| <i>AP2</i>          | NNU_17043 | CATACGACAGAGCAGCCATAA    | GAGCCTCCCATCTTCCACAT     |
| <i>ARF</i>          | NNU_12564 | GAAACAGTTCATCAGAAGGCAATA | TCAAGAGTCCGACCCACATC     |
| <i>ARR</i>          | NNU_13964 | CTTATCCCTTCTGTCCGTTCC    | CCAGTCCAGTTTCACGCTTT     |
| <i>AUX</i>          | NNU_14284 | GTAAGAACATCCTGTCCGTGC    | CTTTCCTAGAGCGTCAGAGAGC   |
| <i>BEL1</i>         | NNU_05289 | GCCTCCGCTACATAGACCAA     | ATGCCCCGAAGGATAGAAACA    |
| <i>CML3</i>         | NNU_17861 | GAGGCATTCAATGTGTTTGACC   | CACCATCCCATCTCCATCC      |
| <i>COL</i>          | NNU_00495 | ACCCACTCCGTCTCCATTTA     | CGATGATACGCTCTGGCTAA     |
| <i>COL</i>          | NNU_08202 | ACCTGGACATGGATTACGAT     | TCTGGAGTGGGAGTTGGATA     |
| <i>COL</i>          | NNU_22255 | ATTCCAGCACTGTCCAAACG     | GACGAGCAGGCAACATAAGC     |
| <i>DOF</i>          | NNU_12021 | AGCCTACCAGTGACCACGAT     | GACCCTCCAGCAGATTACCA     |
| <i>EBF</i>          | NNU_17769 | GAGCAGGATTTCAAGGGTAA     | AAGTGATAGGAACGCAAGGA     |
| <i>ERF118</i>       | NNU_00508 | ACGTTCTCTGTCTTCATCTGG    | TACAGCGTTTTTCATCGTTCCG   |
| <i>FT</i>           | NNU_20154 | ACAGACGGTCTTCGCTCCAA     | CCACCAGTTCATTCTCCCT      |
| <i>FT</i>           | NNU_26362 | GGTTGTTGGTCGTGTAATAGG    | CTTGGACTTGGAGCATCAGG     |
| <i>GAI</i>          | NNU_03991 | ACCACAACCTCCTCTTCAGCA    | CAATAACGCCCGCATCTTTT     |
| <i>GAI</i>          | NNU_26305 | TGGGATACAAGGTTAGGTCCG    | CAGAAGCAAGATGGGAAAGC     |
| <i>GBSS</i>         | NNU_07282 | CAAATGATTGGCACACTGC      | TCATCTACTGGACCACGACC     |
| <i>GH3</i>          | NNU_16506 | CACGACGGTGTAACTCCAAT     | GGTAGACGCTGTTGAGGGAT     |
| <i>GI</i>           | NNU_20074 | CACGGAGAACTGATACGCTAA    | AGCCCTGAATCCTTGTAAT      |
| <i>GID1</i>         | NNU_00999 | GGCTGGAGGTAACGAAATCA     | AGTTCCCGAAGAGTCTGGTG     |
| <i>KING1</i>        | NNU_02097 | ATCACCCCTTCCAGGTTCC      | ACGATGCTTCTCCTATGTTGC    |
| <i>Lipoxygenase</i> | NNU_06221 | GAAATGTCTTCCGTGCTCTA     | CAAGTCATCGTTCGGGTAAT     |
| <i>MYB4</i>         | NNU_03430 | ACCACCACAAACACCAAAAGG    | CCGAAGACAATTCCTGGAGG     |
| <i>Patatin</i>      | NNU_06211 | AGGCGTTACGCAGGAATGAT     | ACGGCAGACCTTCCAGAGTT     |
| <i>Patatin</i>      | NNU_06744 | CGCAGGAATGACGGTAAGTT     | GCACGGGAGAAGACAAATGG     |
| <i>Patatin</i>      | NNU_12540 | CCCGTTTTGATACCTTGTTACG   | CCCAGAGCCAGAAGTCATAGC    |
| <i>Patatin</i>      | NNU_13153 | GGAGGTATGCCGAGCAACGT     | TCGCACGAACGGGAACTCAT     |
| <i>Patatin</i>      | NNU_22977 | AGTATCCCCCAGAACTTCATCC   | ACATTGCTGACTCCATTTCG     |
| <i>PHYA</i>         | NNU_09851 | TGAGATGGTCCGTTTGATTG     | TTCCCTGAAGTGCTAAGTGC     |
| <i>PHYB</i>         | NNU_08548 | GTGGAATGCAGCAATGGA       | ATCCACATATTTTCCTTTCC     |
| <i>PHYC</i>         | NNU_08548 | CCCTCTTTCGGTCTCCAGT      | CCAAATCTATAACCAAACCCACAT |
| <i>PP2C</i>         | NNU_01858 | AATGCTACCTTGGCAAACAC     | CCTCCACCACAGGAAGACAT     |

|             |           |                        |                        |
|-------------|-----------|------------------------|------------------------|
| <i>PP2C</i> | NNU_03660 | ACTTTGGAGCACGGAGGAGA   | AACAGCAGAACCAAGAACCC   |
| <i>PYL</i>  | NNU_00949 | GAGTCGCATGTCATGGGTTT   | GTATCGGCGAACAAGCAAGTA  |
| <i>RAVI</i> | NNU_07628 | GCCGTCACCAACTTCAAGC    | CTTTTACTCACATCGCCATTGC |
| <i>SAUR</i> | NNU_08010 | GGTTCAAGCCGAGGAAGAGTA  | GTGAAGGAGCGGACGAGATT   |
| <i>SOCI</i> | NNU_08844 | AGACCATAGAACGCTATCAACG | CCTTTCTTGCCCTGATGC     |
| <i>SSS</i>  | NNU_02556 | TTTGAACCCTGTGGTCTAAACC | ATCTCTAAGCCCTCCAGTGC   |
| <i>SUS</i>  | NNU_13999 | CCTTGTTGTTGTCGCTGGTT   | ATTGCGTGCCTGGTTCATTT   |
| <i>SUS</i>  | NNU_19077 | GACAATGATGCTGAATGACAGG | CCTCAAGAAGGTCCAGAAGC   |
| <i>WRKY</i> | NNU_14734 | TCATCAGAGCCCTCAACACC   | GGTTCAAGAGCGAAATCACC   |

---

**Table S2. The alignment of novel genes to the annotated genes of the reference lotus genome****(‘China Antique’)**

| Novel gene ID | Length of novel gene | Reference gene ID | Length of reference gene | Identity | Length of identity | E-value   | Score |
|---------------|----------------------|-------------------|--------------------------|----------|--------------------|-----------|-------|
| NNU_26691     | 667                  | NNU_025217        | 4380                     | 0.91     | 209                | 1.01E-75  | 153   |
| NNU_26691     | 667                  | NNU_014307        | 1831                     | 0.91     | 204                | 6.07E-73  | 148   |
| NNU_26698     | 1716                 | NNU_024881        | 2068                     | 0.90     | 252                | 3.36E-89  | 178   |
| NNU_26698     | 1716                 | NNU_022209        | 1172                     | 0.85     | 524                | 1.12E-143 | 276   |
| NNU_26698     | 1716                 | NNU_017053        | 435                      | 0.88     | 421                | 2.42E-140 | 270   |
| NNU_26698     | 1716                 | NNU_002311        | 459                      | 0.93     | 133                | 4.60E-48  | 104   |
| NNU_26698     | 1716                 | NNU_010891        | 2188                     | 0.90     | 120                | 1.68E-37  | 85    |
| NNU_26698     | 1716                 | NNU_007740        | 4566                     | 0.96     | 95                 | 6.03E-37  | 84    |
| NNU_26698     | 1716                 | NNU_017453        | 2338                     | 0.89     | 86                 | 6.16E-22  | 57    |
| NNU_26700     | 1376                 | NNU_004154        | 2060                     | 0.94     | 142                | 7.84E-55  | 116   |
| NNU_26704     | 4388                 | NNU_022560        | 1183                     | 0.94     | 171                | 2.48E-69  | 143   |
| NNU_26704     | 4388                 | NNU_011088        | 711                      | 0.93     | 171                | 5.36E-66  | 137   |
| NNU_26704     | 4388                 | NNU_019155        | 3336                     | 0.94     | 111                | 1.54E-41  | 93    |
| NNU_26705     | 1396                 | NNU_020214        | 2091                     | 0.95     | 387                | 4.01E-177 | 336   |
| NNU_26705     | 1396                 | NNU_017533        | 434                      | 0.96     | 263                | 2.02E-120 | 234   |
| NNU_26705     | 1396                 | NNU_008852        | 1569                     | 0.98     | 239                | 9.45E-114 | 222   |
| NNU_26706     | 806                  | NNU_014645        | 1863                     | 0.91     | 115                | 1.00E-36  | 83    |
| NNU_26707     | 2694                 | NNU_025202        | 1029                     | 0.80     | 939                | 0         | 370   |
| NNU_26710     | 557                  | NNU_011240        | 504                      | 0.96     | 52                 | 7.05E-17  | 47    |
| NNU_26712     | 6946                 | NNU_018306        | 3653                     | 0.75     | 1263               | 9.55E-165 | 315   |
| NNU_26712     | 6946                 | NNU_010865        | 6040                     | 0.85     | 209                | 3.13E-50  | 109   |
| NNU_26712     | 6946                 | NNU_009690        | 338                      | 0.96     | 45                 | 7.11E-12  | 40    |
| NNU_26721     | 705                  | NNU_019843        | 1981                     | 0.94     | 267                | 1.31E-114 | 223   |
| NNU_26721     | 705                  | NNU_009408        | 1198                     | 0.86     | 80                 | 2.50E-17  | 48    |
| NNU_26721     | 705                  | NNU_023186        | 813                      | 0.81     | 89                 | 2.52E-12  | 39    |
| NNU_26730     | 1820                 | NNU_023881        | 1356                     | 0.84     | 253                | 2.22E-61  | 128   |
| NNU_26733     | 1494                 | NNU_004709        | 651                      | 0.93     | 629                | 0         | 506   |
| NNU_26734     | 7180                 | NNU_022370        | 377                      | 0.96     | 185                | 4.01E-79  | 161   |
| NNU_26734     | 7180                 | NNU_024189        | 525                      | 0.94     | 175                | 8.73E-71  | 146   |
| NNU_26734     | 7180                 | NNU_018179        | 2813                     | 0.91     | 94                 | 2.00E-27  | 68    |
| NNU_26735     | 856                  | NNU_000871        | 762                      | 0.96     | 76                 | 2.33E-28  | 68    |
| NNU_26736     | 1995                 | NNU_016415        | 1494                     | 0.95     | 75                 | 9.22E-26  | 64    |
| NNU_26738     | 779                  | NNU_011722        | 3274                     | 0.92     | 70                 | 1.66E-19  | 52    |
| NNU_26739     | 2112                 | NNU_023709        | 1481                     | 0.82     | 568                | 1.40E-133 | 258   |
| NNU_26739     | 2112                 | NNU_017396        | 315                      | 0.92     | 293                | 3.09E-115 | 225   |

|           |      |            |      |      |      |           |     |
|-----------|------|------------|------|------|------|-----------|-----|
| NNU_26740 | 3858 | NNU_000345 | 1701 | 0.96 | 417  | 0         | 367 |
| NNU_26740 | 3858 | NNU_000651 | 4965 | 0.94 | 413  | 2.41E-178 | 339 |
| NNU_26740 | 3858 | NNU_009163 | 1290 | 0.85 | 583  | 1.13E-171 | 327 |
| NNU_26740 | 3858 | NNU_007096 | 354  | 0.91 | 110  | 6.36E-35  | 81  |
| NNU_26740 | 3858 | NNU_016129 | 809  | 0.87 | 161  | 2.25E-44  | 98  |
| NNU_26740 | 3858 | NNU_018062 | 1629 | 0.86 | 95   | 1.81E-20  | 55  |
| NNU_26743 | 1027 | NNU_024334 | 1371 | 0.94 | 367  | 1.41E-155 | 297 |
| NNU_26745 | 1546 | NNU_013295 | 676  | 0.95 | 466  | 0         | 400 |
| NNU_26745 | 1546 | NNU_002317 | 2794 | 0.89 | 192  | 5.24E-62  | 129 |
| NNU_26745 | 1546 | NNU_002327 | 2557 | 0.92 | 161  | 4.08E-58  | 122 |
| NNU_26752 | 2517 | NNU_000451 | 3033 | 0.97 | 384  | 0         | 352 |
| NNU_26752 | 2517 | NNU_000456 | 408  | 0.91 | 198  | 2.35E-72  | 148 |
| NNU_26752 | 2517 | NNU_002532 | 567  | 0.98 | 48   | 1.18E-15  | 46  |
| NNU_26756 | 421  | NNU_011078 | 346  | 0.99 | 116  | 2.99E-54  | 114 |
| NNU_26756 | 421  | NNU_021585 | 389  | 1.00 | 44   | 6.79E-16  | 45  |
| NNU_26756 | 421  | NNU_001080 | 1156 | 0.97 | 71   | 1.44E-27  | 66  |
| NNU_26761 | 4458 | NNU_016735 | 2186 | 0.83 | 1066 | 0         | 531 |
| NNU_26761 | 4458 | NNU_020393 | 968  | 0.91 | 149  | 5.56E-51  | 110 |
| NNU_26764 | 2677 | NNU_026278 | 1317 | 0.91 | 587  | 0         | 437 |
| NNU_26764 | 2677 | NNU_007154 | 468  | 0.88 | 382  | 3.88E-125 | 243 |
| NNU_26766 | 2437 | NNU_016851 | 1845 | 0.93 | 227  | 3.70E-90  | 180 |
| NNU_26770 | 3288 | NNU_011285 | 1338 | 0.95 | 86   | 4.21E-31  | 74  |
| NNU_26770 | 3288 | NNU_008023 | 1462 | 0.90 | 50   | 5.61E-10  | 36  |
| NNU_26770 | 3288 | NNU_003595 | 409  | 0.95 | 54   | 1.55E-15  | 46  |
| NNU_26770 | 3288 | NNU_008845 | 1446 | 0.98 | 59   | 1.19E-21  | 57  |
| NNU_26770 | 3288 | NNU_012119 | 1479 | 0.92 | 59   | 5.57E-15  | 45  |
| NNU_26771 | 426  | NNU_026652 | 1737 | 1.00 | 35   | 6.93E-11  | 36  |
| NNU_26772 | 3243 | NNU_008390 | 2300 | 0.77 | 442  | 3.98E-61  | 128 |
| NNU_26773 | 5419 | NNU_019707 | 3183 | 0.90 | 110  | 4.16E-33  | 78  |
| NNU_26773 | 5419 | NNU_000024 | 971  | 0.96 | 56   | 4.25E-18  | 51  |
| NNU_26773 | 5419 | NNU_016916 | 2220 | 0.88 | 76   | 5.50E-17  | 49  |
| NNU_26773 | 5419 | NNU_003416 | 3965 | 0.83 | 92   | 2.56E-15  | 46  |
| NNU_26773 | 5419 | NNU_007703 | 2002 | 0.95 | 43   | 7.17E-11  | 38  |
| NNU_26773 | 5419 | NNU_002963 | 1798 | 0.88 | 57   | 9.27E-10  | 36  |
| NNU_26773 | 5419 | NNU_000908 | 1704 | 1.00 | 28   | 7.22E-06  | 29  |
| NNU_26774 | 1457 | NNU_001632 | 567  | 0.89 | 121  | 8.55E-35  | 80  |
| NNU_26774 | 1457 | NNU_023355 | 2107 | 0.93 | 66   | 3.14E-19  | 52  |
| NNU_26775 | 5400 | NNU_022660 | 368  | 0.96 | 50   | 9.17E-15  | 45  |
| NNU_26776 | 4216 | NNU_004589 | 3138 | 0.88 | 181  | 2.43E-54  | 116 |
| NNU_26778 | 2524 | NNU_018465 | 4525 | 0.98 | 99   | 2.46E-42  | 94  |
| NNU_26781 | 924  | NNU_021623 | 743  | 0.93 | 464  | 0         | 372 |
| NNU_26781 | 924  | NNU_022542 | 673  | 0.90 | 514  | 0         | 354 |
| NNU_26781 | 924  | NNU_008323 | 2182 | 0.88 | 434  | 1.65E-144 | 277 |
| NNU_26783 | 1743 | NNU_025539 | 2646 | 0.87 | 61   | 2.28E-11  | 38  |

|           |      |            |      |      |      |           |     |
|-----------|------|------------|------|------|------|-----------|-----|
| NNU_26783 | 1743 | NNU_012068 | 1650 | 1.00 | 34   | 1.06E-09  | 35  |
| NNU_26783 | 1743 | NNU_020512 | 795  | 0.88 | 61   | 4.91E-13  | 41  |
| NNU_26783 | 1743 | NNU_005177 | 345  | 0.93 | 344  | 2.46E-140 | 270 |
| NNU_26783 | 1743 | NNU_019302 | 300  | 0.90 | 296  | 5.55E-107 | 210 |
| NNU_26783 | 1743 | NNU_026178 | 1896 | 0.97 | 71   | 6.22E-27  | 66  |
| NNU_26783 | 1743 | NNU_002174 | 2498 | 0.95 | 62   | 2.91E-20  | 54  |
| NNU_26787 | 926  | NNU_013541 | 2210 | 0.97 | 68   | 1.52E-25  | 63  |
| NNU_26789 | 4464 | NNU_016735 | 2186 | 0.83 | 1066 | 0         | 531 |
| NNU_26792 | 2085 | NNU_016753 | 1910 | 0.88 | 148  | 5.64E-43  | 95  |
| NNU_26797 | 2921 | NNU_022907 | 726  | 0.84 | 186  | 2.85E-42  | 94  |
| NNU_26797 | 2921 | NNU_022906 | 1575 | 0.89 | 127  | 7.99E-38  | 86  |
| NNU_26802 | 1205 | NNU_011801 | 1233 | 0.96 | 77   | 9.19E-29  | 69  |
| NNU_26805 | 3592 | NNU_008340 | 285  | 0.88 | 287  | 3.27E-92  | 184 |
| NNU_26805 | 3592 | NNU_008339 | 240  | 0.94 | 68   | 1.30E-21  | 57  |
| NNU_26806 | 2632 | NNU_016133 | 1128 | 0.95 | 455  | 0         | 383 |
| NNU_26806 | 2632 | NNU_010247 | 2872 | 0.84 | 235  | 2.51E-57  | 121 |
| NNU_26807 | 2235 | NNU_022139 | 1062 | 0.98 | 81   | 2.21E-32  | 76  |
| NNU_26812 | 621  | NNU_003523 | 5621 | 0.94 | 122  | 2.10E-47  | 102 |
| NNU_26813 | 2744 | NNU_005411 | 1487 | 0.91 | 122  | 4.48E-40  | 90  |
| NNU_26813 | 2744 | NNU_002170 | 2242 | 0.96 | 90   | 5.84E-34  | 79  |
| NNU_26813 | 2744 | NNU_026493 | 2025 | 0.93 | 43   | 1.68E-09  | 35  |
| NNU_26814 | 2003 | NNU_007397 | 555  | 0.86 | 170  | 1.95E-42  | 94  |
| NNU_26816 | 1169 | NNU_021438 | 3246 | 0.94 | 51   | 2.53E-14  | 43  |
| NNU_26817 | 981  | NNU_022480 | 864  | 0.90 | 162  | 9.29E-53  | 112 |
| NNU_26819 | 627  | NNU_018358 | 3427 | 0.91 | 252  | 1.19E-94  | 187 |
| NNU_26820 | 2743 | NNU_004918 | 321  | 0.96 | 52   | 1.29E-15  | 46  |
| NNU_26822 | 1427 | NNU_020911 | 1942 | 0.85 | 361  | 2.75E-99  | 196 |
| NNU_26822 | 1427 | NNU_010376 | 799  | 0.85 | 348  | 1.28E-97  | 193 |
| NNU_26822 | 1427 | NNU_007644 | 517  | 0.88 | 172  | 2.28E-50  | 108 |
| NNU_26822 | 1427 | NNU_018787 | 1068 | 0.93 | 83   | 1.82E-26  | 65  |
| NNU_26825 | 5215 | NNU_018731 | 1407 | 1.00 | 29   | 1.93E-06  | 30  |
| NNU_26826 | 1134 | NNU_012640 | 912  | 0.91 | 85   | 6.72E-25  | 62  |
| NNU_26827 | 1995 | NNU_024881 | 2068 | 0.92 | 237  | 3.02E-90  | 180 |
| NNU_26827 | 1995 | NNU_022209 | 1172 | 0.89 | 226  | 6.69E-72  | 147 |
| NNU_26827 | 1995 | NNU_017053 | 435  | 0.93 | 160  | 1.14E-59  | 125 |
| NNU_26827 | 1995 | NNU_002311 | 459  | 0.91 | 242  | 6.55E-87  | 174 |
| NNU_26831 | 531  | NNU_024923 | 912  | 0.92 | 121  | 6.47E-42  | 92  |
| NNU_26832 | 661  | NNU_005126 | 423  | 0.97 | 99   | 2.92E-41  | 91  |
| NNU_26832 | 661  | NNU_005124 | 423  | 0.97 | 99   | 2.92E-41  | 91  |
| NNU_26832 | 661  | NNU_005125 | 252  | 0.99 | 70   | 1.78E-28  | 68  |
| NNU_26833 | 398  | NNU_005125 | 252  | 0.99 | 98   | 2.85E-44  | 96  |
| NNU_26833 | 398  | NNU_005126 | 423  | 0.99 | 98   | 2.85E-44  | 96  |
| NNU_26833 | 398  | NNU_005124 | 423  | 0.99 | 98   | 2.85E-44  | 96  |
| NNU_26833 | 398  | NNU_005129 | 414  | 0.87 | 98   | 2.93E-24  | 60  |

|           |      |            |       |      |      |           |     |
|-----------|------|------------|-------|------|------|-----------|-----|
| NNU_26834 | 1632 | NNU_018694 | 1109  | 0.94 | 98   | 9.59E-35  | 80  |
| NNU_26840 | 844  | NNU_001156 | 1757  | 1.00 | 33   | 1.82E-09  | 34  |
| NNU_26841 | 502  | NNU_011078 | 346   | 1.00 | 46   | 6.32E-17  | 47  |
| NNU_26841 | 502  | NNU_001080 | 1156  | 0.97 | 74   | 3.72E-29  | 69  |
| NNU_26841 | 502  | NNU_021585 | 389   | 1.00 | 47   | 1.76E-17  | 48  |
| NNU_26842 | 294  | NNU_002335 | 2572  | 0.93 | 60   | 9.93E-18  | 48  |
| NNU_26842 | 294  | NNU_011026 | 588   | 0.95 | 59   | 7.67E-19  | 50  |
| NNU_26842 | 294  | NNU_013103 | 320   | 0.94 | 103  | 7.46E-39  | 86  |
| NNU_26844 | 637  | NNU_015858 | 2227  | 0.97 | 484  | 0         | 440 |
| NNU_26845 | 1940 | NNU_024881 | 2068  | 0.93 | 185  | 6.50E-72  | 147 |
| NNU_26845 | 1940 | NNU_022209 | 1172  | 0.89 | 226  | 6.50E-72  | 147 |
| NNU_26845 | 1940 | NNU_002311 | 459   | 0.91 | 434  | 2.63E-170 | 324 |
| NNU_26845 | 1940 | NNU_017053 | 435   | 0.93 | 160  | 1.10E-59  | 125 |
| NNU_26846 | 810  | NNU_003240 | 4821  | 0.95 | 236  | 5.50E-104 | 204 |
| NNU_26846 | 810  | NNU_001754 | 1638  | 0.99 | 68   | 2.84E-27  | 66  |
| NNU_26846 | 810  | NNU_008327 | 3038  | 0.98 | 41   | 2.90E-12  | 39  |
| NNU_26848 | 668  | NNU_014840 | 1005  | 0.94 | 176  | 1.02E-70  | 144 |
| NNU_26848 | 668  | NNU_020839 | 1449  | 0.93 | 484  | 0         | 390 |
| NNU_26850 | 546  | NNU_019338 | 708   | 0.97 | 246  | 2.16E-116 | 226 |
| NNU_26852 | 707  | NNU_020268 | 1368  | 0.98 | 118  | 1.84E-53  | 113 |
| NNU_26852 | 707  | NNU_003501 | 2994  | 0.93 | 166  | 3.91E-65  | 134 |
| NNU_26852 | 707  | NNU_019657 | 2058  | 0.96 | 139  | 1.42E-59  | 124 |
| NNU_26852 | 707  | NNU_020709 | 1813  | 0.94 | 106  | 1.46E-39  | 88  |
| NNU_26852 | 707  | NNU_026156 | 834   | 0.96 | 76   | 1.91E-28  | 68  |
| NNU_26852 | 707  | NNU_019006 | 783   | 1.00 | 47   | 2.51E-17  | 48  |
| NNU_26852 | 707  | NNU_020607 | 11238 | 1.00 | 47   | 2.51E-17  | 48  |
| NNU_26852 | 707  | NNU_006247 | 12398 | 0.98 | 47   | 1.17E-15  | 45  |
| NNU_26853 | 640  | NNU_019657 | 2058  | 0.93 | 407  | 1.10E-164 | 313 |
| NNU_26853 | 640  | NNU_016153 | 3082  | 0.86 | 407  | 5.42E-123 | 238 |
| NNU_26853 | 640  | NNU_020268 | 1368  | 0.95 | 239  | 9.26E-106 | 207 |
| NNU_26854 | 1671 | NNU_019396 | 1534  | 0.87 | 1236 | 0         | 761 |
| NNU_26854 | 1671 | NNU_013094 | 3807  | 0.78 | 991  | 1.04E-173 | 330 |
| NNU_26855 | 1409 | NNU_026370 | 598   | 0.97 | 289  | 7.17E-135 | 260 |
| NNU_26855 | 1409 | NNU_014334 | 343   | 0.98 | 59   | 1.81E-21  | 56  |
| NNU_26855 | 1409 | NNU_024161 | 393   | 0.90 | 283  | 1.26E-97  | 193 |
| NNU_26855 | 1409 | NNU_025141 | 375   | 0.96 | 90   | 2.97E-34  | 79  |
| NNU_26855 | 1409 | NNU_024022 | 2305  | 0.84 | 136  | 2.99E-29  | 70  |
| NNU_26855 | 1409 | NNU_022546 | 842   | 0.94 | 67   | 1.81E-21  | 56  |
| NNU_26855 | 1409 | NNU_014577 | 3299  | 0.90 | 76   | 8.44E-20  | 53  |
| NNU_26855 | 1409 | NNU_012624 | 2304  | 0.95 | 57   | 1.41E-17  | 49  |
| NNU_26858 | 3482 | NNU_015963 | 2227  | 0.87 | 334  | 8.69E-103 | 203 |
| NNU_26861 | 1199 | NNU_010700 | 1074  | 0.91 | 571  | 0         | 422 |
| NNU_26861 | 1199 | NNU_025929 | 2439  | 0.92 | 178  | 2.42E-64  | 133 |
| NNU_26861 | 1199 | NNU_024209 | 816   | 0.73 | 427  | 1.17E-32  | 76  |



|           |      |            |      |      |     |           |     |
|-----------|------|------------|------|------|-----|-----------|-----|
| NNU_26862 | 3284 | NNU_009987 | 2338 | 0.80 | 799 | 9.73E-162 | 309 |
| NNU_26862 | 3284 | NNU_015737 | 3181 | 0.90 | 124 | 3.23E-37  | 85  |
| NNU_26867 | 3264 | NNU_000105 | 8491 | 0.85 | 195 | 1.89E-49  | 107 |
| NNU_26867 | 3264 | NNU_018295 | 1659 | 0.92 | 96  | 5.41E-30  | 72  |
| NNU_26867 | 3264 | NNU_012954 | 4811 | 0.80 | 173 | 1.51E-25  | 64  |
| NNU_26867 | 3264 | NNU_023190 | 3293 | 0.97 | 35  | 9.31E-08  | 32  |
| NNU_26871 | 2961 | NNU_004709 | 651  | 0.92 | 624 | 0         | 481 |
| NNU_26881 | 5627 | NNU_006793 | 2234 | 0.95 | 141 | 5.40E-57  | 121 |
| NNU_26881 | 5627 | NNU_014030 | 1406 | 0.99 | 68  | 2.03E-26  | 66  |
| NNU_26893 | 986  | NNU_008140 | 2424 | 0.89 | 217 | 2.53E-73  | 149 |
| NNU_26896 | 2129 | NNU_022365 | 180  | 0.90 | 145 | 1.59E-48  | 105 |
| NNU_26896 | 2129 | NNU_016228 | 3982 | 0.96 | 65  | 7.67E-22  | 57  |
| NNU_26896 | 2129 | NNU_020181 | 1280 | 0.88 | 72  | 9.99E-16  | 46  |
| NNU_26897 | 5917 | NNU_023587 | 6443 | 0.88 | 189 | 1.58E-57  | 122 |
| NNU_26897 | 5917 | NNU_025181 | 4436 | 0.91 | 154 | 5.72E-52  | 112 |
| NNU_26897 | 5917 | NNU_021398 | 1920 | 0.87 | 80  | 7.77E-16  | 47  |
| NNU_26898 | 1517 | NNU_012659 | 2863 | 0.97 | 37  | 9.23E-10  | 35  |
| NNU_26899 | 2582 | NNU_005775 | 408  | 0.97 | 155 | 4.04E-70  | 144 |
| NNU_26899 | 2582 | NNU_019869 | 833  | 0.93 | 168 | 5.26E-64  | 133 |
| NNU_26900 | 924  | NNU_012719 | 3170 | 1.00 | 32  | 7.20E-09  | 33  |
| NNU_26900 | 924  | NNU_005228 | 950  | 0.88 | 45  | 3.35E-07  | 30  |
| NNU_26916 | 620  | NNU_005419 | 714  | 0.87 | 449 | 6.54E-147 | 281 |
| NNU_26916 | 620  | NNU_019894 | 381  | 0.86 | 359 | 1.15E-109 | 214 |
| NNU_26916 | 620  | NNU_010891 | 2188 | 0.89 | 287 | 1.95E-97  | 192 |
| NNU_26916 | 620  | NNU_015549 | 588  | 0.84 | 392 | 7.02E-97  | 191 |
| NNU_26916 | 620  | NNU_002891 | 429  | 0.86 | 262 | 5.58E-78  | 157 |
| NNU_26917 | 2965 | NNU_026179 | 931  | 0.88 | 168 | 6.18E-49  | 106 |
| NNU_26917 | 2965 | NNU_018192 | 1620 | 0.87 | 103 | 1.78E-24  | 62  |
| NNU_26918 | 859  | NNU_026229 | 783  | 0.92 | 118 | 1.78E-39  | 88  |
| NNU_26921 | 985  | NNU_010626 | 1381 | 0.98 | 56  | 1.63E-20  | 54  |
| NNU_26921 | 985  | NNU_005789 | 609  | 0.97 | 59  | 5.86E-20  | 53  |
| NNU_26921 | 985  | NNU_010248 | 324  | 0.94 | 46  | 1.28E-11  | 38  |
| NNU_26925 | 1437 | NNU_003770 | 1495 | 0.92 | 193 | 3.73E-68  | 140 |
| NNU_26928 | 1352 | NNU_015918 | 1215 | 0.93 | 216 | 4.42E-87  | 174 |
| NNU_26928 | 1352 | NNU_009765 | 1224 | 0.82 | 546 | 4.17E-127 | 246 |
| NNU_26928 | 1352 | NNU_008272 | 819  | 1.00 | 27  | 6.40E-06  | 28  |
| NNU_26928 | 1352 | NNU_013947 | 591  | 0.94 | 66  | 6.26E-21  | 55  |
| NNU_26929 | 2755 | NNU_022582 | 3065 | 0.94 | 208 | 1.52E-84  | 170 |
| NNU_26931 | 480  | NNU_009548 | 813  | 0.78 | 355 | 5.74E-52  | 110 |
| NNU_26932 | 1418 | NNU_026413 | 1746 | 0.93 | 185 | 4.73E-72  | 147 |
| NNU_26933 | 714  | NNU_000817 | 3097 | 0.92 | 73  | 3.25E-21  | 55  |
| NNU_26935 | 1895 | NNU_012606 | 428  | 0.93 | 75  | 4.07E-24  | 61  |
| NNU_26940 | 1616 | NNU_010626 | 1381 | 0.98 | 56  | 2.70E-20  | 54  |
| NNU_26940 | 1616 | NNU_005789 | 609  | 0.97 | 59  | 9.70E-20  | 53  |

|           |      |            |      |      |     |           |     |
|-----------|------|------------|------|------|-----|-----------|-----|
| NNU_26940 | 1616 | NNU_012122 | 1214 | 0.92 | 47  | 2.74E-10  | 36  |
| NNU_26940 | 1616 | NNU_010248 | 324  | 0.94 | 46  | 2.11E-11  | 38  |
| NNU_26941 | 3195 | NNU_025539 | 2646 | 0.93 | 241 | 3.73E-96  | 191 |
| NNU_26941 | 3195 | NNU_012068 | 1650 | 0.95 | 91  | 8.80E-33  | 77  |
| NNU_26941 | 3195 | NNU_020512 | 795  | 0.93 | 398 | 9.40E-167 | 318 |
| NNU_26941 | 3195 | NNU_019302 | 300  | 0.96 | 243 | 1.31E-110 | 217 |
| NNU_26941 | 3195 | NNU_019303 | 339  | 0.83 | 369 | 6.38E-79  | 160 |
| NNU_26941 | 3195 | NNU_026066 | 2602 | 0.84 | 238 | 8.49E-58  | 122 |
| NNU_26945 | 749  | NNU_001509 | 1115 | 0.88 | 287 | 6.65E-93  | 184 |
| NNU_26947 | 969  | NNU_002374 | 1254 | 0.94 | 192 | 2.46E-78  | 158 |
| NNU_26947 | 969  | NNU_007328 | 1665 | 0.90 | 189 | 3.25E-62  | 129 |
| NNU_26947 | 969  | NNU_003770 | 1495 | 1.00 | 63  | 4.42E-26  | 64  |
| NNU_26950 | 1009 | NNU_000870 | 4044 | 0.90 | 273 | 8.98E-98  | 193 |
| NNU_26950 | 1009 | NNU_021663 | 474  | 0.95 | 62  | 1.67E-20  | 54  |
| NNU_26950 | 1009 | NNU_019675 | 440  | 0.96 | 88  | 2.74E-33  | 77  |
| NNU_26950 | 1009 | NNU_023065 | 228  | 0.95 | 77  | 3.56E-27  | 66  |
| NNU_26951 | 1359 | NNU_015918 | 1215 | 0.93 | 216 | 4.44E-87  | 174 |
| NNU_26951 | 1359 | NNU_009765 | 1224 | 0.82 | 546 | 4.19E-127 | 246 |
| NNU_26951 | 1359 | NNU_008272 | 819  | 1.00 | 27  | 6.43E-06  | 28  |
| NNU_26951 | 1359 | NNU_013947 | 591  | 0.94 | 66  | 6.30E-21  | 55  |
| NNU_26953 | 1660 | NNU_006263 | 3879 | 0.96 | 461 | 0         | 405 |
| NNU_26953 | 1660 | NNU_024464 | 2401 | 0.79 | 441 | 1.52E-82  | 166 |
| NNU_26953 | 1660 | NNU_018326 | 1371 | 0.99 | 147 | 7.18E-71  | 145 |
| NNU_26953 | 1660 | NNU_006264 | 417  | 0.95 | 128 | 5.71E-52  | 111 |
| NNU_26956 | 1359 | NNU_005587 | 2744 | 0.95 | 125 | 2.17E-50  | 108 |
| NNU_26961 | 573  | NNU_026673 | 1164 | 1.00 | 94  | 1.51E-43  | 95  |
| NNU_26963 | 2467 | NNU_012606 | 428  | 0.93 | 75  | 5.32E-24  | 61  |
| NNU_26964 | 759  | NNU_001141 | 1191 | 0.94 | 67  | 9.63E-22  | 56  |
| NNU_26964 | 759  | NNU_012765 | 3480 | 0.87 | 68  | 5.84E-14  | 42  |
| NNU_26968 | 3653 | NNU_012338 | 3819 | 0.88 | 300 | 7.15E-94  | 187 |
| NNU_26971 | 2905 | NNU_020133 | 1047 | 0.95 | 38  | 2.30E-08  | 33  |
| NNU_26974 | 1819 | NNU_021508 | 1830 | 0.82 | 548 | 1.21E-128 | 249 |
| NNU_26974 | 1819 | NNU_025936 | 1427 | 0.81 | 531 | 3.42E-119 | 232 |
| NNU_26974 | 1819 | NNU_021507 | 1008 | 0.81 | 504 | 7.45E-111 | 217 |
| NNU_26975 | 1231 | NNU_006627 | 1059 | 0.89 | 134 | 1.99E-40  | 90  |
| NNU_26980 | 1736 | NNU_024572 | 1353 | 0.85 | 87  | 1.75E-17  | 49  |
| NNU_26982 | 1930 | NNU_021561 | 1383 | 0.90 | 110 | 1.47E-33  | 78  |
| NNU_26985 | 1015 | NNU_022434 | 585  | 0.91 | 386 | 2.34E-148 | 284 |
| NNU_26985 | 1015 | NNU_021897 | 1865 | 0.94 | 243 | 4.17E-101 | 199 |
| NNU_26985 | 1015 | NNU_004188 | 1973 | 0.95 | 202 | 5.51E-85  | 170 |
| NNU_26985 | 1015 | NNU_012596 | 297  | 0.89 | 183 | 9.56E-58  | 121 |
| NNU_26985 | 1015 | NNU_005149 | 234  | 0.93 | 143 | 7.44E-54  | 114 |
| NNU_26990 | 3012 | NNU_025476 | 974  | 0.94 | 84  | 8.36E-28  | 68  |
| NNU_26990 | 3012 | NNU_019144 | 2645 | 0.99 | 84  | 1.38E-35  | 82  |

|           |      |            |      |      |     |           |     |
|-----------|------|------------|------|------|-----|-----------|-----|
| NNU_26990 | 3012 | NNU_005379 | 690  | 1.00 | 55  | 3.92E-21  | 56  |
| NNU_26990 | 3012 | NNU_013070 | 1851 | 0.97 | 88  | 1.78E-34  | 80  |
| NNU_26990 | 3012 | NNU_024447 | 315  | 0.96 | 91  | 1.78E-34  | 80  |
| NNU_26990 | 3012 | NNU_024547 | 800  | 0.94 | 85  | 4.99E-30  | 72  |
| NNU_26990 | 3012 | NNU_000671 | 2394 | 0.84 | 113 | 1.09E-21  | 57  |
| NNU_26990 | 3012 | NNU_017273 | 368  | 0.84 | 106 | 1.41E-20  | 55  |
| NNU_26990 | 3012 | NNU_007381 | 1297 | 0.83 | 111 | 1.41E-20  | 55  |
| NNU_26990 | 3012 | NNU_015383 | 2314 | 0.86 | 95  | 5.06E-20  | 54  |
| NNU_26996 | 862  | NNU_020286 | 531  | 0.96 | 153 | 3.71E-66  | 136 |
| NNU_26996 | 862  | NNU_017947 | 1445 | 0.87 | 166 | 1.06E-46  | 101 |
| NNU_26999 | 3011 | NNU_024628 | 357  | 1.00 | 45  | 1.42E-15  | 46  |
| NNU_27000 | 801  | NNU_024628 | 357  | 0.93 | 72  | 7.87E-23  | 58  |
| NNU_27007 | 3441 | NNU_006202 | 1832 | 0.93 | 179 | 9.02E-68  | 140 |
| NNU_27009 | 516  | NNU_018146 | 2614 | 0.93 | 202 | 1.28E-78  | 158 |
| NNU_27009 | 516  | NNU_010316 | 2507 | 0.87 | 102 | 3.86E-24  | 60  |
| NNU_27014 | 1054 | NNU_020298 | 2205 | 0.81 | 761 | 3.06E-167 | 318 |
| NNU_27014 | 1054 | NNU_020300 | 2358 | 0.85 | 417 | 9.13E-118 | 229 |
| NNU_27014 | 1054 | NNU_017794 | 2289 | 0.76 | 762 | 2.61E-98  | 194 |
| NNU_27015 | 1770 | NNU_021106 | 861  | 0.94 | 114 | 1.72E-42  | 94  |
| NNU_27015 | 1770 | NNU_009800 | 471  | 0.94 | 108 | 8.00E-41  | 91  |
| NNU_27015 | 1770 | NNU_025703 | 372  | 0.92 | 112 | 1.34E-38  | 87  |
| NNU_27015 | 1770 | NNU_010852 | 721  | 0.89 | 71  | 8.28E-16  | 46  |
| NNU_27016 | 3661 | NNU_017816 | 3246 | 0.85 | 300 | 7.27E-84  | 169 |
| NNU_27019 | 673  | NNU_011077 | 1364 | 0.89 | 60  | 1.85E-13  | 41  |
| NNU_27020 | 440  | NNU_025027 | 627  | 0.97 | 109 | 5.27E-47  | 101 |
| NNU_27020 | 440  | NNU_016246 | 219  | 0.93 | 104 | 1.49E-37  | 84  |
| NNU_27022 | 1076 | NNU_021600 | 1011 | 0.84 | 572 | 1.48E-150 | 288 |
| NNU_27023 | 1765 | NNU_005601 | 2759 | 0.95 | 77  | 6.30E-27  | 66  |
| NNU_27023 | 1765 | NNU_005288 | 1245 | 0.94 | 151 | 3.61E-59  | 124 |
| NNU_27023 | 1765 | NNU_009451 | 3613 | 0.91 | 42  | 1.80E-07  | 31  |
| NNU_27026 | 653  | NNU_020665 | 1657 | 0.96 | 225 | 3.42E-100 | 197 |
| NNU_27031 | 1014 | NNU_017621 | 3087 | 0.94 | 256 | 1.15E-106 | 209 |
| NNU_27031 | 1014 | NNU_023451 | 972  | 0.91 | 195 | 2.02E-69  | 142 |
| NNU_27031 | 1014 | NNU_010557 | 1044 | 0.94 | 152 | 2.05E-59  | 124 |
| NNU_27031 | 1014 | NNU_012342 | 2118 | 0.95 | 79  | 2.77E-28  | 68  |
| NNU_27031 | 1014 | NNU_000085 | 237  | 0.93 | 79  | 6.00E-25  | 62  |
| NNU_27034 | 1369 | NNU_023139 | 567  | 0.83 | 487 | 3.29E-123 | 239 |
| NNU_27034 | 1369 | NNU_022594 | 291  | 0.90 | 286 | 7.33E-100 | 197 |
| NNU_27035 | 3294 | NNU_013518 | 1225 | 0.87 | 333 | 4.95E-100 | 198 |
| NNU_27035 | 3294 | NNU_007140 | 669  | 0.82 | 370 | 5.12E-75  | 153 |
| NNU_27035 | 3294 | NNU_000126 | 297  | 0.89 | 129 | 3.24E-37  | 85  |
| NNU_27035 | 3294 | NNU_013131 | 788  | 0.94 | 66  | 1.54E-20  | 55  |
| NNU_27036 | 4470 | NNU_022584 | 1295 | 0.86 | 935 | 0         | 529 |
| NNU_27036 | 4470 | NNU_022583 | 899  | 0.89 | 465 | 1.72E-160 | 307 |

|           |      |            |      |      |      |           |      |
|-----------|------|------------|------|------|------|-----------|------|
| NNU_27037 | 1686 | NNU_011989 | 2150 | 0.96 | 149  | 1.23E-63  | 132  |
| NNU_27037 | 1686 | NNU_022585 | 543  | 0.80 | 179  | 3.62E-24  | 61   |
| NNU_27037 | 1686 | NNU_025702 | 1017 | 0.97 | 36   | 3.69E-09  | 34   |
| NNU_27039 | 1739 | NNU_004737 | 1642 | 0.92 | 92   | 2.86E-30  | 72   |
| NNU_27041 | 883  | NNU_012633 | 1817 | 1.00 | 47   | 3.15E-17  | 48   |
| NNU_27041 | 883  | NNU_024797 | 711  | 0.96 | 53   | 3.15E-17  | 48   |
| NNU_27043 | 1269 | NNU_018697 | 795  | 0.95 | 74   | 2.10E-25  | 63   |
| NNU_27043 | 1269 | NNU_022510 | 3503 | 0.86 | 118  | 3.48E-28  | 68   |
| NNU_27043 | 1269 | NNU_020083 | 1309 | 0.82 | 179  | 2.67E-34  | 79   |
| NNU_27043 | 1269 | NNU_016528 | 2420 | 0.90 | 77   | 2.11E-20  | 54   |
| NNU_27043 | 1269 | NNU_008204 | 708  | 1.00 | 38   | 4.60E-12  | 39   |
| NNU_27044 | 805  | NNU_015985 | 1728 | 0.94 | 150  | 5.82E-59  | 123  |
| NNU_27046 | 1579 | NNU_015118 | 603  | 0.95 | 140  | 5.39E-57  | 120  |
| NNU_27052 | 715  | NNU_014487 | 234  | 0.91 | 102  | 6.90E-33  | 76   |
| NNU_27053 | 2091 | NNU_007140 | 669  | 0.82 | 370  | 3.24E-75  | 153  |
| NNU_27053 | 2091 | NNU_013131 | 788  | 0.94 | 66   | 9.74E-21  | 55   |
| NNU_27056 | 3630 | NNU_015478 | 585  | 0.89 | 557  | 0         | 365  |
| NNU_27056 | 3630 | NNU_021223 | 573  | 0.89 | 453  | 1.81E-154 | 296  |
| NNU_27059 | 1584 | NNU_015614 | 2541 | 0.93 | 72   | 1.58E-22  | 58   |
| NNU_27059 | 1584 | NNU_023770 | 1012 | 0.85 | 117  | 2.62E-25  | 63   |
| NNU_27059 | 1584 | NNU_010891 | 2188 | 0.94 | 50   | 1.24E-13  | 42   |
| NNU_27063 | 975  | NNU_003605 | 1604 | 0.96 | 81   | 4.42E-31  | 73   |
| NNU_27066 | 559  | NNU_013613 | 2280 | 0.93 | 244  | 1.76E-97  | 192  |
| NNU_27067 | 1892 | NNU_003680 | 2768 | 0.92 | 63   | 1.90E-17  | 49   |
| NNU_27068 | 948  | NNU_021815 | 1485 | 0.96 | 450  | 0         | 403  |
| NNU_27068 | 948  | NNU_016236 | 972  | 0.96 | 453  | 0         | 399  |
| NNU_27068 | 948  | NNU_017752 | 1728 | 0.95 | 450  | 0         | 379  |
| NNU_27068 | 948  | NNU_000013 | 1668 | 0.86 | 406  | 2.26E-123 | 239  |
| NNU_27068 | 948  | NNU_014128 | 231  | 0.96 | 139  | 2.48E-58  | 122  |
| NNU_27070 | 1077 | NNU_026606 | 567  | 0.90 | 237  | 5.86E-85  | 170  |
| NNU_27073 | 1978 | NNU_004478 | 1815 | 0.90 | 1523 | 0         | 1077 |
| NNU_27078 | 1100 | NNU_020029 | 460  | 0.96 | 70   | 6.52E-25  | 62   |
| NNU_27078 | 1100 | NNU_005456 | 1281 | 0.93 | 56   | 6.61E-15  | 44   |
| NNU_27079 | 3198 | NNU_015963 | 2227 | 0.89 | 229  | 2.30E-78  | 159  |
| NNU_27085 | 633  | NNU_012103 | 1062 | 0.94 | 287  | 4.14E-124 | 240  |
| NNU_27087 | 1070 | NNU_020863 | 420  | 0.80 | 173  | 8.19E-24  | 60   |
| NNU_27092 | 7108 | NNU_012719 | 3170 | 1.00 | 29   | 2.64E-06  | 30   |
| NNU_27093 | 1017 | NNU_004213 | 1496 | 0.94 | 411  | 2.93E-172 | 327  |
| NNU_27093 | 1017 | NNU_002377 | 1446 | 0.93 | 80   | 1.67E-25  | 63   |
| NNU_27096 | 797  | NNU_023441 | 708  | 0.91 | 162  | 2.68E-57  | 120  |
| NNU_27097 | 5736 | NNU_007740 | 4566 | 0.89 | 256  | 3.17E-84  | 170  |
| NNU_27097 | 5736 | NNU_007469 | 1122 | 0.87 | 117  | 3.43E-29  | 71   |
| NNU_27100 | 2294 | NNU_002370 | 2306 | 0.82 | 1510 | 0         | 654  |
| NNU_27102 | 5833 | NNU_006122 | 2814 | 0.90 | 154  | 2.62E-50  | 109  |

|           |      |            |       |      |      |           |     |
|-----------|------|------------|-------|------|------|-----------|-----|
| NNU_27106 | 1649 | NNU_011667 | 3946  | 0.86 | 258  | 4.26E-73  | 149 |
| NNU_27108 | 1100 | NNU_015025 | 3165  | 0.77 | 287  | 4.97E-36  | 82  |
| NNU_27109 | 2203 | NNU_002583 | 882   | 0.96 | 45   | 2.24E-12  | 40  |
| NNU_27114 | 936  | NNU_006782 | 481   | 0.84 | 205  | 8.92E-48  | 103 |
| NNU_27120 | 495  | NNU_022866 | 1822  | 0.85 | 205  | 9.92E-50  | 106 |
| NNU_27120 | 495  | NNU_016509 | 1670  | 0.86 | 181  | 1.28E-48  | 104 |
| NNU_27121 | 761  | NNU_011428 | 1274  | 0.92 | 119  | 1.21E-40  | 90  |
| NNU_27121 | 761  | NNU_021735 | 4484  | 0.96 | 70   | 4.46E-25  | 62  |
| NNU_27123 | 964  | NNU_015142 | 1007  | 0.83 | 171  | 9.32E-38  | 85  |
| NNU_27123 | 964  | NNU_016437 | 948   | 0.89 | 111  | 9.39E-33  | 76  |
| NNU_27124 | 2523 | NNU_024122 | 531   | 0.88 | 74   | 9.17E-17  | 48  |
| NNU_27126 | 1082 | NNU_019484 | 2201  | 0.92 | 126  | 6.23E-45  | 98  |
| NNU_27129 | 546  | NNU_018023 | 665   | 0.97 | 91   | 6.71E-37  | 83  |
| NNU_27131 | 3705 | NNU_023603 | 1334  | 0.82 | 999  | 0         | 454 |
| NNU_27131 | 3705 | NNU_023604 | 477   | 0.80 | 214  | 2.82E-38  | 87  |
| NNU_27131 | 3705 | NNU_013891 | 4066  | 0.75 | 163  | 2.27E-09  | 35  |
| NNU_27132 | 2312 | NNU_000105 | 8491  | 0.89 | 254  | 9.83E-86  | 172 |
| NNU_27133 | 904  | NNU_009850 | 1861  | 0.88 | 409  | 4.53E-140 | 269 |
| NNU_27133 | 904  | NNU_012922 | 3084  | 0.96 | 79   | 5.29E-30  | 71  |
| NNU_27133 | 904  | NNU_020809 | 481   | 1.00 | 32   | 7.04E-09  | 33  |
| NNU_27143 | 858  | NNU_017710 | 998   | 0.94 | 71   | 6.53E-24  | 60  |
| NNU_27143 | 858  | NNU_018356 | 1248  | 0.92 | 97   | 1.39E-30  | 72  |
| NNU_27143 | 858  | NNU_022987 | 1672  | 0.99 | 73   | 5.01E-30  | 71  |
| NNU_27143 | 858  | NNU_010778 | 2015  | 0.94 | 66   | 3.93E-21  | 55  |
| NNU_27146 | 1523 | NNU_026179 | 931   | 0.91 | 54   | 1.54E-12  | 40  |
| NNU_27148 | 1414 | NNU_001270 | 1211  | 0.88 | 368  | 9.44E-124 | 240 |
| NNU_27148 | 1414 | NNU_015258 | 2673  | 0.97 | 127  | 8.06E-55  | 116 |
| NNU_27149 | 5828 | NNU_011536 | 2652  | 0.94 | 131  | 9.42E-50  | 108 |
| NNU_27149 | 5828 | NNU_015379 | 2005  | 0.95 | 131  | 2.03E-51  | 111 |
| NNU_27149 | 5828 | NNU_011799 | 3165  | 0.90 | 104  | 2.08E-31  | 75  |
| NNU_27149 | 5828 | NNU_018374 | 327   | 0.94 | 67   | 7.60E-21  | 56  |
| NNU_27149 | 5828 | NNU_010689 | 12272 | 0.95 | 55   | 7.66E-16  | 47  |
| NNU_27150 | 751  | NNU_006463 | 2141  | 0.92 | 163  | 1.95E-58  | 122 |
| NNU_27153 | 4951 | NNU_018306 | 3653  | 0.76 | 1277 | 0         | 358 |
| NNU_27161 | 3086 | NNU_002668 | 6805  | 0.77 | 171  | 2.43E-13  | 42  |
| NNU_27163 | 956  | NNU_011763 | 1384  | 0.84 | 349  | 1.11E-91  | 182 |
| NNU_27164 | 2788 | NNU_003015 | 1310  | 0.86 | 88   | 2.18E-18  | 51  |
| NNU_27164 | 2788 | NNU_019907 | 1719  | 0.87 | 78   | 2.82E-17  | 49  |
| NNU_27166 | 550  | NNU_006520 | 716   | 0.84 | 91   | 6.96E-17  | 47  |
| NNU_27172 | 1942 | NNU_021126 | 758   | 0.82 | 120  | 3.25E-20  | 54  |
| NNU_27172 | 1942 | NNU_004544 | 413   | 0.92 | 87   | 1.93E-27  | 67  |
| NNU_27172 | 1942 | NNU_010144 | 437   | 0.89 | 73   | 5.44E-18  | 50  |
| NNU_27172 | 1942 | NNU_000752 | 673   | 0.85 | 393  | 1.33E-108 | 213 |
| NNU_27172 | 1942 | NNU_018454 | 774   | 0.83 | 427  | 1.04E-104 | 206 |

|           |      |            |      |      |     |          |     |
|-----------|------|------------|------|------|-----|----------|-----|
| NNU_27172 | 1942 | NNU_018474 | 305  | 0.93 | 57  | 9.10E-16 | 46  |
| NNU_27172 | 1942 | NNU_003286 | 414  | 0.88 | 112 | 1.15E-29 | 71  |
| NNU_27172 | 1942 | NNU_023930 | 743  | 0.91 | 112 | 2.46E-36 | 83  |
| NNU_27172 | 1942 | NNU_021045 | 297  | 0.90 | 209 | 1.40E-73 | 150 |
| NNU_27172 | 1942 | NNU_025156 | 411  | 0.94 | 85  | 1.15E-29 | 71  |
| NNU_27172 | 1942 | NNU_004540 | 309  | 0.87 | 240 | 2.34E-71 | 146 |
| NNU_27172 | 1942 | NNU_022375 | 423  | 0.84 | 260 | 6.55E-67 | 138 |
| NNU_27172 | 1942 | NNU_015186 | 287  | 0.86 | 227 | 5.10E-63 | 131 |
| NNU_27172 | 1942 | NNU_001444 | 744  | 0.87 | 108 | 6.94E-27 | 66  |
| NNU_27172 | 1942 | NNU_014619 | 558  | 0.92 | 170 | 6.60E-62 | 129 |
| NNU_27172 | 1942 | NNU_022647 | 499  | 0.93 | 134 | 8.66E-51 | 109 |
| NNU_27172 | 1942 | NNU_017240 | 300  | 0.86 | 222 | 1.43E-58 | 123 |
| NNU_27172 | 1942 | NNU_021363 | 282  | 0.86 | 209 | 1.43E-58 | 123 |
| NNU_27172 | 1942 | NNU_005319 | 467  | 0.92 | 145 | 5.18E-53 | 113 |
| NNU_27172 | 1942 | NNU_007191 | 336  | 0.89 | 172 | 4.00E-54 | 115 |
| NNU_27172 | 1942 | NNU_017939 | 301  | 0.91 | 151 | 1.86E-52 | 112 |
| NNU_27172 | 1942 | NNU_018147 | 318  | 0.91 | 151 | 8.66E-51 | 109 |
| NNU_27172 | 1942 | NNU_009701 | 318  | 0.91 | 151 | 8.66E-51 | 109 |
| NNU_27172 | 1942 | NNU_019355 | 1881 | 0.80 | 270 | 3.11E-50 | 108 |
| NNU_27172 | 1942 | NNU_018925 | 283  | 0.91 | 134 | 3.14E-45 | 99  |
| NNU_27172 | 1942 | NNU_021125 | 4062 | 0.82 | 117 | 3.25E-20 | 54  |
| NNU_27172 | 1942 | NNU_018119 | 422  | 0.90 | 135 | 4.06E-44 | 97  |
| NNU_27172 | 1942 | NNU_026333 | 552  | 0.93 | 111 | 4.09E-39 | 88  |
| NNU_27172 | 1942 | NNU_008359 | 216  | 0.86 | 170 | 5.25E-43 | 95  |
| NNU_27172 | 1942 | NNU_008167 | 1470 | 0.91 | 88  | 2.49E-26 | 65  |
| NNU_27172 | 1942 | NNU_017151 | 639  | 0.78 | 114 | 7.08E-12 | 39  |
| NNU_27172 | 1942 | NNU_018477 | 960  | 0.81 | 213 | 3.16E-40 | 90  |
| NNU_27172 | 1942 | NNU_021315 | 669  | 0.84 | 112 | 1.17E-19 | 53  |
| NNU_27172 | 1942 | NNU_024125 | 225  | 0.84 | 116 | 5.40E-23 | 59  |
| NNU_27172 | 1942 | NNU_001817 | 729  | 0.84 | 109 | 2.51E-21 | 56  |
| NNU_27172 | 1942 | NNU_002516 | 1158 | 0.98 | 45  | 4.23E-14 | 43  |
| NNU_27172 | 1942 | NNU_016433 | 405  | 0.90 | 89  | 3.23E-25 | 63  |
| NNU_27172 | 1942 | NNU_012332 | 615  | 0.86 | 115 | 3.23E-25 | 63  |
| NNU_27172 | 1942 | NNU_015825 | 482  | 0.88 | 93  | 4.17E-24 | 61  |
| NNU_27172 | 1942 | NNU_001683 | 2407 | 0.90 | 81  | 1.94E-22 | 58  |
| NNU_27172 | 1942 | NNU_025100 | 1056 | 0.96 | 49  | 1.18E-14 | 44  |
| NNU_27172 | 1942 | NNU_004982 | 345  | 0.90 | 57  | 1.97E-12 | 40  |
| NNU_27172 | 1942 | NNU_023030 | 500  | 0.86 | 69  | 1.97E-12 | 40  |
| NNU_27172 | 1942 | NNU_007518 | 391  | 1.00 | 29  | 7.14E-07 | 30  |
| NNU_27174 | 1945 | NNU_018179 | 2813 | 0.89 | 78  | 4.21E-19 | 52  |
| NNU_27175 | 2181 | NNU_001077 | 1788 | 0.83 | 369 | 1.54E-88 | 177 |
| NNU_27175 | 2181 | NNU_020981 | 903  | 0.84 | 381 | 1.52E-98 | 195 |
| NNU_27175 | 2181 | NNU_007252 | 468  | 0.84 | 368 | 7.07E-97 | 192 |
| NNU_27175 | 2181 | NNU_010260 | 795  | 0.84 | 369 | 1.53E-93 | 186 |

|           |      |            |      |      |     |           |     |
|-----------|------|------------|------|------|-----|-----------|-----|
| NNU_27175 | 2181 | NNU_019069 | 828  | 0.80 | 275 | 1.26E-49  | 107 |
| NNU_27177 | 3096 | NNU_001849 | 1626 | 0.97 | 127 | 1.78E-54  | 116 |
| NNU_27177 | 3096 | NNU_018787 | 1068 | 0.93 | 111 | 1.82E-39  | 89  |
| NNU_27178 | 902  | NNU_000080 | 511  | 0.90 | 74  | 5.35E-20  | 53  |
| NNU_27180 | 2495 | NNU_009048 | 3900 | 0.99 | 68  | 8.94E-27  | 66  |
| NNU_27184 | 1741 | NNU_021526 | 216  | 0.89 | 191 | 5.91E-62  | 129 |
| NNU_27185 | 654  | NNU_025927 | 2007 | 1.00 | 166 | 2.11E-82  | 165 |
| NNU_27188 | 495  | NNU_017212 | 363  | 0.95 | 76  | 6.14E-27  | 65  |
| NNU_27190 | 442  | NNU_017657 | 1451 | 0.94 | 69  | 4.24E-23  | 58  |
| NNU_27190 | 442  | NNU_011752 | 551  | 1.00 | 27  | 2.02E-06  | 28  |
| NNU_27190 | 442  | NNU_026054 | 1862 | 1.00 | 27  | 2.02E-06  | 28  |
| NNU_27195 | 3839 | NNU_008981 | 3358 | 0.89 | 73  | 5.03E-16  | 47  |
| NNU_27201 | 4566 | NNU_012111 | 525  | 0.95 | 145 | 4.38E-57  | 121 |
| NNU_27201 | 4566 | NNU_000462 | 630  | 1.00 | 30  | 4.70E-07  | 31  |
| NNU_27201 | 4566 | NNU_006777 | 2034 | 0.97 | 97  | 2.69E-39  | 89  |
| NNU_27203 | 845  | NNU_025476 | 974  | 0.97 | 70  | 1.07E-26  | 65  |
| NNU_27206 | 1631 | NNU_011182 | 2134 | 0.93 | 400 | 3.68E-168 | 320 |
| NNU_27206 | 1631 | NNU_024239 | 579  | 0.82 | 151 | 1.25E-28  | 69  |
| NNU_27206 | 1631 | NNU_008507 | 435  | 0.91 | 340 | 8.38E-130 | 251 |
| NNU_27206 | 1631 | NNU_007556 | 2754 | 0.97 | 255 | 6.57E-121 | 235 |
| NNU_27206 | 1631 | NNU_026622 | 1329 | 0.95 | 253 | 4.01E-108 | 212 |
| NNU_27206 | 1631 | NNU_024963 | 321  | 0.94 | 224 | 4.10E-93  | 185 |
| NNU_27206 | 1631 | NNU_010365 | 486  | 0.89 | 112 | 4.46E-33  | 77  |
| NNU_27208 | 190  | NNU_025983 | 582  | 1.00 | 53  | 2.84E-21  | 54  |
| NNU_27214 | 722  | NNU_020278 | 657  | 0.85 | 163 | 1.15E-40  | 90  |
| NNU_27216 | 1550 | NNU_009292 | 385  | 0.95 | 98  | 1.51E-37  | 85  |
| NNU_27217 | 724  | NNU_021773 | 3093 | 0.97 | 186 | 1.40E-84  | 169 |
| NNU_27220 | 2810 | NNU_002856 | 1368 | 0.90 | 521 | 0         | 366 |
| NNU_27220 | 2810 | NNU_018359 | 1682 | 0.90 | 196 | 3.43E-66  | 137 |
| NNU_27220 | 2810 | NNU_002851 | 3157 | 0.82 | 199 | 2.74E-42  | 94  |
| NNU_27223 | 1238 | NNU_000747 | 1250 | 0.92 | 607 | 0         | 459 |
| NNU_27223 | 1238 | NNU_020290 | 459  | 0.81 | 254 | 2.55E-49  | 106 |
| NNU_27224 | 2476 | NNU_009426 | 450  | 0.96 | 444 | 0         | 385 |
| NNU_27226 | 1035 | NNU_019539 | 2996 | 0.81 | 918 | 0         | 385 |
| NNU_27227 | 1954 | NNU_022558 | 1152 | 0.93 | 247 | 1.05E-99  | 197 |
| NNU_27227 | 1954 | NNU_011153 | 4018 | 0.84 | 152 | 5.36E-33  | 77  |
| NNU_27231 | 9995 | NNU_011479 | 3229 | 0.93 | 60  | 3.65E-16  | 48  |
| NNU_27231 | 9995 | NNU_002617 | 4309 | 0.87 | 280 | 2.58E-82  | 167 |
| NNU_27232 | 705  | NNU_011428 | 1274 | 0.92 | 119 | 1.12E-40  | 90  |
| NNU_27233 | 663  | NNU_017671 | 3786 | 0.90 | 227 | 4.63E-79  | 159 |
| NNU_27234 | 3572 | NNU_008383 | 6243 | 0.94 | 355 | 2.31E-153 | 294 |
| NNU_27234 | 3572 | NNU_019602 | 4736 | 0.78 | 215 | 1.66E-25  | 64  |
| NNU_27235 | 1363 | NNU_011377 | 1803 | 0.93 | 262 | 4.33E-107 | 210 |
| NNU_27235 | 1363 | NNU_004510 | 2124 | 0.97 | 129 | 6.01E-56  | 118 |

|           |      |            |       |      |      |           |     |
|-----------|------|------------|-------|------|------|-----------|-----|
| NNU_27235 | 1363 | NNU_015496 | 726   | 0.97 | 60   | 6.31E-21  | 55  |
| NNU_27235 | 1363 | NNU_018995 | 1149  | 0.95 | 57   | 1.37E-17  | 49  |
| NNU_27235 | 1363 | NNU_022414 | 2268  | 0.88 | 56   | 2.30E-10  | 36  |
| NNU_27240 | 913  | NNU_004289 | 2769  | 0.92 | 287  | 2.85E-112 | 219 |
| NNU_27243 | 651  | NNU_008198 | 1032  | 0.95 | 165  | 5.96E-68  | 139 |
| NNU_27243 | 651  | NNU_025639 | 261   | 0.93 | 165  | 1.29E-64  | 133 |
| NNU_27247 | 4223 | NNU_008383 | 6243  | 0.94 | 355  | 2.73E-153 | 294 |
| NNU_27247 | 4223 | NNU_008327 | 3038  | 0.85 | 173  | 5.34E-41  | 92  |
| NNU_27247 | 4223 | NNU_019602 | 4736  | 0.87 | 76   | 5.54E-16  | 47  |
| NNU_27248 | 950  | NNU_006615 | 2381  | 1.00 | 37   | 1.23E-11  | 38  |
| NNU_27250 | 677  | NNU_022715 | 2134  | 0.89 | 208  | 3.73E-65  | 134 |
| NNU_27250 | 677  | NNU_017018 | 1341  | 0.98 | 46   | 4.01E-15  | 44  |
| NNU_27251 | 7093 | NNU_003586 | 1512  | 0.86 | 374  | 3.77E-114 | 224 |
| NNU_27251 | 7093 | NNU_004770 | 2166  | 0.83 | 124  | 2.57E-21  | 57  |
| NNU_27251 | 7093 | NNU_025977 | 5169  | 0.88 | 66   | 1.56E-13  | 43  |
| NNU_27254 | 9942 | NNU_025173 | 3253  | 0.94 | 49   | 2.83E-12  | 41  |
| NNU_27254 | 9942 | NNU_006219 | 2926  | 0.92 | 48   | 4.74E-10  | 37  |
| NNU_27265 | 932  | NNU_001329 | 4100  | 0.92 | 72   | 4.28E-21  | 55  |
| NNU_27265 | 932  | NNU_025289 | 1250  | 0.87 | 137  | 1.17E-36  | 83  |
| NNU_27266 | 800  | NNU_002064 | 1194  | 0.94 | 62   | 6.12E-19  | 51  |
| NNU_27267 | 1197 | NNU_018001 | 2025  | 0.97 | 108  | 5.34E-46  | 100 |
| NNU_27267 | 1197 | NNU_014983 | 324   | 0.97 | 92   | 4.19E-37  | 84  |
| NNU_27269 | 650  | NNU_004910 | 3684  | 0.88 | 409  | 1.51E-133 | 257 |
| NNU_27273 | 737  | NNU_015858 | 2227  | 0.94 | 153  | 5.31E-59  | 123 |
| NNU_27273 | 737  | NNU_002744 | 630   | 1.00 | 57   | 7.22E-23  | 58  |
| NNU_27273 | 737  | NNU_001142 | 2459  | 0.98 | 59   | 2.60E-22  | 57  |
| NNU_27277 | 2275 | NNU_003163 | 4594  | 0.95 | 192  | 2.09E-82  | 166 |
| NNU_27277 | 2275 | NNU_013632 | 373   | 0.87 | 136  | 6.25E-33  | 77  |
| NNU_27280 | 7866 | NNU_001144 | 2131  | 0.83 | 1040 | 0         | 520 |
| NNU_27283 | 5344 | NNU_019568 | 10194 | 0.83 | 432  | 2.85E-109 | 215 |
| NNU_27283 | 5344 | NNU_005160 | 2298  | 0.83 | 87   | 3.26E-14  | 44  |
| NNU_27287 | 690  | NNU_010137 | 2418  | 0.95 | 128  | 1.08E-50  | 108 |
| NNU_27287 | 690  | NNU_016948 | 1683  | 0.93 | 125  | 1.09E-45  | 99  |
| NNU_27289 | 1567 | NNU_010340 | 819   | 0.98 | 94   | 9.14E-40  | 89  |
| NNU_27289 | 1567 | NNU_010849 | 2426  | 0.88 | 136  | 1.53E-37  | 85  |
| NNU_27289 | 1567 | NNU_006638 | 630   | 0.95 | 92   | 4.28E-33  | 77  |
| NNU_27289 | 1567 | NNU_006548 | 666   | 0.92 | 92   | 9.27E-30  | 71  |
| NNU_27290 | 6124 | NNU_006638 | 630   | 0.93 | 268  | 3.27E-109 | 215 |
| NNU_27290 | 6124 | NNU_006548 | 666   | 0.91 | 55   | 1.74E-12  | 41  |
| NNU_27290 | 6124 | NNU_004044 | 1086  | 0.96 | 68   | 4.77E-23  | 60  |
| NNU_27290 | 6124 | NNU_024894 | 240   | 0.94 | 226  | 3.34E-94  | 188 |
| NNU_27290 | 6124 | NNU_023862 | 1091  | 0.98 | 47   | 1.04E-14  | 45  |
| NNU_27303 | 3110 | NNU_017663 | 987   | 0.96 | 68   | 2.42E-23  | 60  |
| NNU_27304 | 2210 | NNU_022260 | 1308  | 0.87 | 679  | 0         | 419 |



|           |       |            |       |      |     |           |     |
|-----------|-------|------------|-------|------|-----|-----------|-----|
| NNU_27304 | 2210  | NNU_022258 | 468   | 0.93 | 236 | 3.33E-95  | 189 |
| NNU_27309 | 1481  | NNU_012323 | 1206  | 0.89 | 348 | 5.96E-121 | 235 |
| NNU_27310 | 2238  | NNU_006966 | 2569  | 0.97 | 205 | 5.65E-93  | 185 |
| NNU_27310 | 2238  | NNU_013468 | 4060  | 0.96 | 204 | 3.40E-90  | 180 |
| NNU_27311 | 1992  | NNU_023277 | 1563  | 0.94 | 835 | 0         | 685 |
| NNU_27312 | 10635 | NNU_019220 | 1089  | 0.95 | 101 | 2.26E-38  | 88  |
| NNU_27312 | 10635 | NNU_012882 | 1458  | 0.95 | 90  | 2.94E-32  | 77  |
| NNU_27315 | 13307 | NNU_004610 | 768   | 0.89 | 208 | 7.59E-64  | 134 |
| NNU_27317 | 1185  | NNU_024689 | 2106  | 0.93 | 601 | 0         | 477 |
| NNU_27317 | 1185  | NNU_018847 | 633   | 0.94 | 347 | 7.62E-149 | 285 |
| NNU_27318 | 2320  | NNU_023841 | 1522  | 0.85 | 79  | 1.82E-13  | 42  |
| NNU_27320 | 2294  | NNU_003989 | 289   | 0.96 | 66  | 2.30E-22  | 58  |
| NNU_27320 | 2294  | NNU_018261 | 312   | 0.93 | 58  | 3.87E-15  | 45  |
| NNU_27320 | 2294  | NNU_005767 | 1998  | 0.97 | 130 | 2.83E-56  | 119 |
| NNU_27320 | 2294  | NNU_019839 | 2445  | 0.91 | 145 | 4.77E-49  | 106 |
| NNU_27320 | 2294  | NNU_018175 | 3180  | 0.95 | 58  | 6.44E-18  | 50  |
| NNU_27322 | 3436  | NNU_001495 | 1802  | 0.87 | 673 | 0         | 406 |
| NNU_27323 | 1018  | NNU_013518 | 1225  | 0.89 | 213 | 7.31E-69  | 141 |
| NNU_27323 | 1018  | NNU_000126 | 297   | 0.87 | 128 | 3.57E-32  | 75  |
| NNU_27325 | 1298  | NNU_010485 | 4363  | 0.91 | 344 | 1.85E-130 | 252 |
| NNU_27328 | 1533  | NNU_024119 | 1033  | 0.96 | 198 | 1.39E-87  | 175 |
| NNU_27328 | 1533  | NNU_000516 | 2817  | 0.97 | 115 | 8.81E-50  | 107 |
| NNU_27328 | 1533  | NNU_014098 | 2278  | 0.94 | 116 | 1.15E-43  | 96  |
| NNU_27330 | 617   | NNU_024335 | 1449  | 0.98 | 61  | 1.67E-23  | 59  |
| NNU_27332 | 1791  | NNU_022769 | 5052  | 0.92 | 982 | 0         | 759 |
| NNU_27332 | 1791  | NNU_001772 | 894   | 0.94 | 231 | 3.48E-94  | 187 |
| NNU_27332 | 1791  | NNU_012847 | 1012  | 0.96 | 74  | 2.30E-26  | 65  |
| NNU_27332 | 1791  | NNU_001771 | 510   | 0.91 | 300 | 1.58E-112 | 220 |
| NNU_27332 | 1791  | NNU_022770 | 453   | 0.88 | 335 | 9.48E-110 | 215 |
| NNU_27332 | 1791  | NNU_020289 | 252   | 0.92 | 185 | 3.61E-69  | 142 |
| NNU_27332 | 1791  | NNU_011441 | 626   | 0.90 | 132 | 1.74E-42  | 94  |
| NNU_27339 | 3096  | NNU_003989 | 289   | 0.95 | 65  | 1.12E-21  | 57  |
| NNU_27339 | 3096  | NNU_018261 | 312   | 0.95 | 54  | 1.89E-14  | 44  |
| NNU_27339 | 3096  | NNU_005767 | 1998  | 0.97 | 130 | 3.83E-56  | 119 |
| NNU_27339 | 3096  | NNU_019839 | 2445  | 0.91 | 145 | 6.46E-49  | 106 |
| NNU_27339 | 3096  | NNU_018175 | 3180  | 0.95 | 58  | 8.71E-18  | 50  |
| NNU_27351 | 2455  | NNU_008628 | 1389  | 0.93 | 125 | 3.98E-45  | 99  |
| NNU_27353 | 7510  | NNU_024993 | 2661  | 0.94 | 63  | 1.64E-18  | 52  |
| NNU_27353 | 7510  | NNU_019568 | 10194 | 0.85 | 79  | 5.94E-13  | 42  |
| NNU_27357 | 3774  | NNU_010118 | 2266  | 0.87 | 120 | 1.74E-30  | 73  |
| NNU_27362 | 1627  | NNU_005395 | 885   | 0.87 | 333 | 1.12E-103 | 204 |
| NNU_27362 | 1627  | NNU_006096 | 1803  | 1.00 | 31  | 4.61E-08  | 32  |
| NNU_27362 | 1627  | NNU_003637 | 3363  | 0.88 | 186 | 1.54E-57  | 121 |
| NNU_27365 | 4431  | NNU_019963 | 1331  | 0.86 | 186 | 1.99E-50  | 109 |

|           |      |            |      |      |      |           |     |
|-----------|------|------------|------|------|------|-----------|-----|
| NNU_27365 | 4431 | NNU_022532 | 1385 | 0.90 | 115  | 2.63E-34  | 80  |
| NNU_27365 | 4431 | NNU_014577 | 3299 | 0.96 | 51   | 2.09E-15  | 46  |
| NNU_27368 | 1847 | NNU_016081 | 717  | 0.98 | 63   | 3.97E-24  | 61  |
| NNU_27368 | 1847 | NNU_010339 | 2791 | 0.96 | 67   | 5.13E-23  | 59  |
| NNU_27368 | 1847 | NNU_007622 | 1965 | 0.90 | 205  | 2.22E-71  | 146 |
| NNU_27368 | 1847 | NNU_014290 | 865  | 0.84 | 96   | 1.86E-17  | 49  |
| NNU_27371 | 1082 | NNU_010025 | 1320 | 0.87 | 150  | 1.04E-42  | 94  |
| NNU_27373 | 564  | NNU_021207 | 1461 | 0.91 | 98   | 9.04E-31  | 72  |
| NNU_27374 | 1152 | NNU_013999 | 2203 | 0.87 | 203  | 1.81E-60  | 126 |
| NNU_27375 | 534  | NNU_009693 | 3296 | 0.89 | 72   | 5.21E-18  | 49  |
| NNU_27376 | 936  | NNU_022585 | 543  | 0.83 | 320  | 8.55E-78  | 157 |
| NNU_27381 | 1634 | NNU_013994 | 1843 | 0.91 | 1176 | 0         | 865 |
| NNU_27381 | 1634 | NNU_016182 | 1863 | 0.80 | 1142 | 0         | 456 |
| NNU_27383 | 5858 | NNU_005840 | 1809 | 0.88 | 85   | 9.88E-20  | 54  |
| NNU_27384 | 1096 | NNU_012277 | 1174 | 1.00 | 32   | 8.58E-09  | 33  |
| NNU_27386 | 2388 | NNU_021293 | 1422 | 0.89 | 70   | 8.67E-17  | 48  |
| NNU_27386 | 2388 | NNU_009835 | 1263 | 0.97 | 37   | 1.46E-09  | 35  |
| NNU_27387 | 916  | NNU_006722 | 2107 | 0.85 | 486  | 7.68E-138 | 265 |
| NNU_27388 | 225  | NNU_006722 | 2107 | 0.94 | 219  | 8.65E-92  | 181 |
| NNU_27389 | 1288 | NNU_026168 | 2643 | 0.89 | 279  | 4.14E-97  | 192 |
| NNU_27393 | 276  | NNU_004717 | 1147 | 0.97 | 86   | 1.95E-34  | 78  |
| NNU_27393 | 276  | NNU_004713 | 1384 | 0.94 | 79   | 3.29E-27  | 65  |
| NNU_27393 | 276  | NNU_022650 | 672  | 0.96 | 82   | 3.26E-32  | 74  |
| NNU_27393 | 276  | NNU_022653 | 534  | 0.94 | 86   | 4.22E-31  | 72  |
| NNU_27393 | 276  | NNU_004715 | 748  | 0.94 | 79   | 3.29E-27  | 65  |
| NNU_27407 | 4172 | NNU_003309 | 2535 | 0.97 | 33   | 4.29E-07  | 31  |
| NNU_27408 | 1842 | NNU_007864 | 4444 | 0.86 | 277  | 1.32E-78  | 159 |
| NNU_27408 | 1842 | NNU_021868 | 3754 | 0.83 | 280  | 2.89E-65  | 135 |
| NNU_27412 | 413  | NNU_026678 | 768  | 0.99 | 99   | 2.29E-45  | 98  |
| NNU_27412 | 413  | NNU_007379 | 1316 | 0.91 | 118  | 1.39E-37  | 84  |
| NNU_27412 | 413  | NNU_020429 | 375  | 0.94 | 99   | 5.00E-37  | 83  |
| NNU_27412 | 413  | NNU_007380 | 1324 | 0.89 | 118  | 3.01E-34  | 78  |
| NNU_27414 | 916  | NNU_011376 | 2115 | 0.84 | 484  | 4.69E-125 | 242 |
| NNU_27416 | 1942 | NNU_025238 | 2223 | 0.96 | 917  | 0         | 800 |
| NNU_27416 | 1942 | NNU_008440 | 3497 | 0.87 | 152  | 8.78E-41  | 91  |
| NNU_27416 | 1942 | NNU_005197 | 4773 | 0.89 | 126  | 6.84E-37  | 84  |
| NNU_27416 | 1942 | NNU_016509 | 1670 | 0.93 | 71   | 6.99E-22  | 57  |
| NNU_27416 | 1942 | NNU_013582 | 2698 | 0.90 | 77   | 4.20E-19  | 52  |
| NNU_27416 | 1942 | NNU_008260 | 1606 | 0.98 | 40   | 2.55E-11  | 38  |
| NNU_27418 | 5246 | NNU_001397 | 1838 | 0.78 | 312  | 3.07E-44  | 98  |
| NNU_27420 | 2542 | NNU_025197 | 607  | 0.92 | 134  | 8.85E-47  | 102 |
| NNU_27422 | 7468 | NNU_011368 | 1694 | 0.82 | 157  | 9.61E-31  | 74  |
| NNU_27428 | 1834 | NNU_000105 | 8491 | 0.78 | 360  | 1.76E-52  | 112 |
| NNU_27430 | 3163 | NNU_025238 | 2223 | 0.93 | 194  | 1.06E-76  | 156 |

|           |      |            |      |      |      |           |     |
|-----------|------|------------|------|------|------|-----------|-----|
| NNU_27430 | 3163 | NNU_008440 | 3497 | 0.87 | 152  | 1.44E-40  | 91  |
| NNU_27430 | 3163 | NNU_005197 | 4773 | 0.89 | 126  | 1.12E-36  | 84  |
| NNU_27430 | 3163 | NNU_016509 | 1670 | 0.93 | 71   | 1.14E-21  | 57  |
| NNU_27430 | 3163 | NNU_013582 | 2698 | 0.90 | 77   | 6.88E-19  | 52  |
| NNU_27430 | 3163 | NNU_008260 | 1606 | 0.98 | 40   | 4.17E-11  | 38  |
| NNU_27433 | 3378 | NNU_012817 | 870  | 0.97 | 159  | 1.47E-70  | 145 |
| NNU_27434 | 1566 | NNU_013059 | 7552 | 0.91 | 168  | 1.92E-56  | 119 |
| NNU_27434 | 1566 | NNU_017456 | 1068 | 0.93 | 84   | 1.55E-27  | 67  |
| NNU_27439 | 1395 | NNU_023195 | 2039 | 0.94 | 89   | 1.77E-31  | 74  |
| NNU_27440 | 2235 | NNU_010577 | 855  | 0.97 | 380  | 0         | 343 |
| NNU_27440 | 2235 | NNU_005639 | 1620 | 0.88 | 466  | 2.41E-151 | 290 |
| NNU_27440 | 2235 | NNU_012342 | 2118 | 0.93 | 338  | 8.79E-141 | 271 |
| NNU_27440 | 2235 | NNU_000086 | 444  | 0.91 | 185  | 9.78E-66  | 136 |
| NNU_27440 | 2235 | NNU_006711 | 657  | 0.94 | 162  | 4.55E-64  | 133 |
| NNU_27442 | 1075 | NNU_010761 | 1222 | 0.92 | 216  | 4.55E-81  | 163 |
| NNU_27443 | 2147 | NNU_018605 | 3015 | 0.94 | 374  | 1.06E-159 | 305 |
| NNU_27443 | 2147 | NNU_020482 | 2307 | 0.90 | 122  | 1.63E-38  | 87  |
| NNU_27443 | 2147 | NNU_020483 | 261  | 0.83 | 157  | 4.56E-34  | 79  |
| NNU_27444 | 2289 | NNU_012342 | 2118 | 0.94 | 491  | 0         | 398 |
| NNU_27444 | 2289 | NNU_010577 | 855  | 0.96 | 354  | 2.42E-166 | 317 |
| NNU_27444 | 2289 | NNU_000086 | 444  | 0.86 | 338  | 1.61E-93  | 186 |
| NNU_27444 | 2289 | NNU_005639 | 1620 | 0.93 | 174  | 1.00E-65  | 136 |
| NNU_27444 | 2289 | NNU_006711 | 657  | 0.93 | 136  | 2.84E-51  | 110 |
| NNU_27445 | 7831 | NNU_006709 | 3256 | 0.86 | 319  | 4.31E-89  | 179 |
| NNU_27445 | 7831 | NNU_006009 | 2228 | 0.80 | 386  | 1.24E-64  | 135 |
| NNU_27445 | 7831 | NNU_019670 | 1557 | 0.93 | 94   | 1.01E-30  | 74  |
| NNU_27445 | 7831 | NNU_024899 | 3722 | 0.83 | 158  | 4.69E-29  | 71  |
| NNU_27448 | 486  | NNU_015330 | 2378 | 0.98 | 45   | 1.02E-14  | 43  |
| NNU_27448 | 486  | NNU_017715 | 2110 | 0.98 | 62   | 3.63E-24  | 60  |
| NNU_27448 | 486  | NNU_019106 | 1804 | 0.90 | 62   | 7.90E-16  | 45  |
| NNU_27453 | 837  | NNU_018987 | 588  | 1.00 | 32   | 6.50E-09  | 33  |
| NNU_27453 | 837  | NNU_004213 | 1496 | 1.00 | 42   | 1.80E-14  | 43  |
| NNU_27453 | 837  | NNU_010299 | 471  | 0.90 | 182  | 1.68E-59  | 124 |
| NNU_27453 | 837  | NNU_020895 | 171  | 0.90 | 96   | 8.18E-28  | 67  |
| NNU_27454 | 3369 | NNU_022071 | 1878 | 0.87 | 77   | 3.41E-17  | 49  |
| NNU_27454 | 3369 | NNU_007766 | 4299 | 0.85 | 76   | 2.65E-13  | 42  |
| NNU_27460 | 1155 | NNU_009590 | 1260 | 0.85 | 320  | 1.74E-90  | 180 |
| NNU_27464 | 4596 | NNU_009142 | 2628 | 0.81 | 277  | 1.22E-57  | 122 |
| NNU_27464 | 4596 | NNU_004745 | 492  | 0.87 | 96   | 4.63E-22  | 58  |
| NNU_27467 | 4132 | NNU_019087 | 300  | 1.00 | 62   | 6.91E-25  | 63  |
| NNU_27469 | 2757 | NNU_002388 | 2638 | 0.77 | 2281 | 0         | 659 |
| NNU_27471 | 916  | NNU_025929 | 2439 | 0.95 | 146  | 1.43E-60  | 126 |
| NNU_27471 | 916  | NNU_023677 | 1617 | 0.94 | 92   | 3.21E-32  | 75  |
| NNU_27474 | 4314 | NNU_002927 | 654  | 0.94 | 168  | 4.07E-67  | 139 |

|           |      |            |      |      |      |           |     |
|-----------|------|------------|------|------|------|-----------|-----|
| NNU_27477 | 754  | NNU_023138 | 561  | 0.93 | 272  | 2.34E-112 | 219 |
| NNU_27477 | 754  | NNU_008554 | 810  | 0.86 | 262  | 1.14E-75  | 153 |
| NNU_27478 | 333  | NNU_023138 | 561  | 0.96 | 142  | 1.78E-60  | 125 |
| NNU_27484 | 6914 | NNU_005539 | 3351 | 0.83 | 218  | 2.42E-46  | 102 |
| NNU_27485 | 1864 | NNU_011205 | 1746 | 0.82 | 1079 | 0         | 502 |
| NNU_27486 | 617  | NNU_026208 | 2283 | 0.93 | 579  | 0         | 451 |
| NNU_27487 | 2156 | NNU_019154 | 4083 | 0.92 | 237  | 2.53E-91  | 182 |
| NNU_27487 | 2156 | NNU_013237 | 4619 | 0.98 | 45   | 4.71E-14  | 43  |
| NNU_27487 | 2156 | NNU_018795 | 666  | 0.97 | 37   | 1.32E-09  | 35  |
| NNU_27487 | 2156 | NNU_021212 | 4133 | 0.96 | 165  | 9.36E-71  | 145 |
| NNU_27487 | 2156 | NNU_002886 | 752  | 0.83 | 139  | 2.77E-26  | 65  |
| NNU_27488 | 1280 | NNU_021678 | 2946 | 0.92 | 290  | 8.66E-114 | 222 |
| NNU_27488 | 1280 | NNU_013416 | 1143 | 0.86 | 359  | 1.46E-106 | 209 |
| NNU_27489 | 2295 | NNU_020911 | 1942 | 0.93 | 388  | 1.47E-158 | 303 |
| NNU_27489 | 2295 | NNU_010376 | 799  | 0.92 | 372  | 1.15E-149 | 287 |
| NNU_27489 | 2295 | NNU_007644 | 517  | 0.89 | 276  | 1.25E-89  | 179 |
| NNU_27489 | 2295 | NNU_026128 | 522  | 0.95 | 39   | 5.05E-09  | 34  |
| NNU_27493 | 1250 | NNU_023586 | 4593 | 1.00 | 28   | 1.64E-06  | 29  |
| NNU_27493 | 1250 | NNU_005451 | 2106 | 0.97 | 31   | 1.64E-06  | 29  |
| NNU_27497 | 3036 | NNU_000451 | 3033 | 0.92 | 576  | 0         | 451 |
| NNU_27497 | 3036 | NNU_011203 | 3321 | 0.85 | 180  | 4.93E-45  | 99  |
| NNU_27497 | 3036 | NNU_000456 | 408  | 0.90 | 134  | 1.07E-41  | 93  |
| NNU_27497 | 3036 | NNU_010891 | 2188 | 0.91 | 120  | 6.42E-39  | 88  |
| NNU_27497 | 3036 | NNU_023770 | 1012 | 0.96 | 49   | 1.85E-14  | 44  |
| NNU_27498 | 984  | NNU_006803 | 487  | 0.95 | 104  | 5.69E-40  | 89  |
| NNU_27503 | 698  | NNU_008482 | 462  | 0.88 | 154  | 6.64E-43  | 94  |
| NNU_27506 | 688  | NNU_000105 | 8491 | 0.91 | 54   | 6.82E-13  | 40  |
| NNU_27506 | 688  | NNU_023190 | 3293 | 0.93 | 44   | 1.14E-10  | 36  |
| NNU_27506 | 688  | NNU_022848 | 3240 | 1.00 | 30   | 6.87E-08  | 31  |
| NNU_27507 | 3574 | NNU_006672 | 1925 | 0.98 | 43   | 1.01E-12  | 41  |
| NNU_27507 | 3574 | NNU_022664 | 1232 | 0.84 | 66   | 7.89E-09  | 34  |
| NNU_27507 | 3574 | NNU_001234 | 2239 | 1.00 | 29   | 1.32E-06  | 30  |
| NNU_27512 | 1676 | NNU_002750 | 2172 | 0.90 | 116  | 7.62E-36  | 82  |
| NNU_27512 | 1676 | NNU_001299 | 1423 | 0.88 | 65   | 1.31E-13  | 42  |
| NNU_27512 | 1676 | NNU_020594 | 1389 | 0.95 | 38   | 1.32E-08  | 33  |
| NNU_27513 | 3542 | NNU_010002 | 666  | 0.87 | 567  | 3.70E-176 | 335 |
| NNU_27513 | 3542 | NNU_010003 | 489  | 0.95 | 95   | 5.83E-35  | 81  |
| NNU_27513 | 3542 | NNU_010001 | 342  | 0.95 | 65   | 1.28E-21  | 57  |
| NNU_27513 | 3542 | NNU_005031 | 2346 | 0.98 | 43   | 1.00E-12  | 41  |
| NNU_27513 | 3542 | NNU_024617 | 2883 | 1.00 | 28   | 4.70E-06  | 29  |
| NNU_27519 | 5203 | NNU_011285 | 1338 | 0.90 | 343  | 7.56E-125 | 243 |
| NNU_27519 | 5203 | NNU_012814 | 1566 | 0.95 | 97   | 6.64E-36  | 83  |
| NNU_27519 | 5203 | NNU_025653 | 2265 | 0.87 | 153  | 1.10E-43  | 97  |
| NNU_27519 | 5203 | NNU_002907 | 1040 | 0.92 | 121  | 5.10E-42  | 94  |

|           |      |            |      |      |     |           |     |
|-----------|------|------------|------|------|-----|-----------|-----|
| NNU_27520 | 530  | NNU_019886 | 225  | 0.93 | 140 | 1.77E-52  | 111 |
| NNU_27520 | 530  | NNU_011748 | 1422 | 1.00 | 57  | 5.14E-23  | 58  |
| NNU_27521 | 2292 | NNU_013333 | 4081 | 0.92 | 72  | 1.07E-20  | 55  |
| NNU_27522 | 1923 | NNU_024477 | 2439 | 0.93 | 134 | 1.43E-48  | 105 |
| NNU_27523 | 1767 | NNU_017224 | 1056 | 0.82 | 254 | 2.83E-50  | 108 |
| NNU_27532 | 358  | NNU_010937 | 984  | 0.97 | 33  | 3.46E-08  | 31  |
| NNU_27535 | 992  | NNU_004374 | 1620 | 0.89 | 197 | 9.27E-63  | 130 |
| NNU_27541 | 4078 | NNU_024718 | 1382 | 0.82 | 127 | 1.14E-22  | 59  |
| NNU_27545 | 1769 | NNU_005103 | 862  | 0.83 | 216 | 1.02E-49  | 107 |
| NNU_27547 | 1756 | NNU_014624 | 518  | 0.90 | 126 | 3.69E-39  | 88  |
| NNU_27548 | 1046 | NNU_024165 | 885  | 0.89 | 86  | 3.72E-22  | 57  |
| NNU_27553 | 1700 | NNU_013999 | 2203 | 0.88 | 134 | 1.28E-38  | 87  |
| NNU_27554 | 995  | NNU_014047 | 2120 | 0.86 | 445 | 1.40E-135 | 261 |
| NNU_27555 | 1941 | NNU_003942 | 3947 | 0.89 | 192 | 1.83E-62  | 130 |
| NNU_27558 | 992  | NNU_009667 | 4617 | 0.79 | 323 | 4.34E-56  | 118 |
| NNU_27558 | 992  | NNU_015379 | 2005 | 0.85 | 119 | 3.50E-27  | 66  |
| NNU_27562 | 5812 | NNU_016437 | 948  | 0.93 | 302 | 8.45E-125 | 243 |
| NNU_27562 | 5812 | NNU_025067 | 991  | 0.93 | 293 | 8.51E-120 | 234 |
| NNU_27562 | 5812 | NNU_015142 | 1007 | 0.86 | 92  | 9.81E-20  | 54  |
| NNU_27562 | 5812 | NNU_023274 | 1008 | 0.89 | 314 | 8.69E-105 | 207 |
| NNU_27566 | 3548 | NNU_023248 | 3440 | 0.89 | 148 | 2.07E-44  | 98  |
| NNU_27567 | 3097 | NNU_025710 | 3204 | 0.97 | 31  | 4.11E-06  | 29  |
| NNU_27569 | 1289 | NNU_019602 | 4736 | 0.88 | 213 | 4.33E-67  | 138 |
| NNU_27569 | 1289 | NNU_000710 | 1088 | 0.87 | 117 | 2.74E-29  | 70  |
| NNU_27570 | 3015 | NNU_012316 | 729  | 0.93 | 269 | 3.48E-106 | 209 |
| NNU_27570 | 3015 | NNU_003745 | 1275 | 0.91 | 210 | 2.80E-77  | 157 |
| NNU_27571 | 4485 | NNU_008372 | 282  | 0.90 | 281 | 6.75E-100 | 198 |
| NNU_27575 | 2914 | NNU_000235 | 907  | 0.91 | 586 | 0         | 436 |
| NNU_27575 | 2914 | NNU_009639 | 2438 | 0.93 | 57  | 1.37E-15  | 46  |
| NNU_27575 | 2914 | NNU_016587 | 4607 | 1.00 | 28  | 3.87E-06  | 29  |
| NNU_27576 | 1972 | NNU_019833 | 531  | 0.86 | 118 | 1.96E-27  | 67  |
| NNU_27580 | 768  | NNU_021656 | 489  | 0.96 | 50  | 1.27E-15  | 45  |
| NNU_27580 | 768  | NNU_014832 | 633  | 1.00 | 32  | 5.95E-09  | 33  |
| NNU_27581 | 483  | NNU_018748 | 466  | 0.93 | 252 | 4.16E-103 | 202 |
| NNU_27582 | 588  | NNU_007815 | 438  | 0.97 | 66  | 1.23E-24  | 61  |
| NNU_27583 | 1134 | NNU_015225 | 1041 | 0.86 | 562 | 7.08E-169 | 321 |
| NNU_27583 | 1134 | NNU_024502 | 558  | 0.83 | 353 | 2.85E-88  | 176 |
| NNU_27587 | 2403 | NNU_026333 | 552  | 0.88 | 264 | 1.02E-85  | 172 |
| NNU_27587 | 2403 | NNU_021315 | 669  | 0.88 | 126 | 1.10E-35  | 82  |
| NNU_27587 | 2403 | NNU_001817 | 729  | 0.82 | 236 | 6.47E-48  | 104 |
| NNU_27587 | 2403 | NNU_021125 | 4062 | 0.90 | 111 | 5.11E-34  | 79  |
| NNU_27587 | 2403 | NNU_021126 | 758  | 0.90 | 111 | 5.11E-34  | 79  |
| NNU_27587 | 2403 | NNU_025099 | 1215 | 1.00 | 30  | 2.46E-07  | 31  |
| NNU_27587 | 2403 | NNU_017151 | 639  | 0.86 | 156 | 3.03E-41  | 92  |

|           |      |            |      |      |     |          |     |
|-----------|------|------------|------|------|-----|----------|-----|
| NNU_27587 | 2403 | NNU_025458 | 4304 | 0.85 | 127 | 1.85E-28 | 69  |
| NNU_27587 | 2403 | NNU_023930 | 743  | 0.88 | 265 | 1.32E-84 | 170 |
| NNU_27587 | 2403 | NNU_014225 | 1257 | 0.86 | 118 | 1.85E-28 | 69  |
| NNU_27587 | 2403 | NNU_010612 | 424  | 0.95 | 58  | 6.75E-18 | 50  |
| NNU_27587 | 2403 | NNU_025156 | 411  | 0.93 | 111 | 5.07E-39 | 88  |
| NNU_27587 | 2403 | NNU_025100 | 1056 | 0.81 | 96  | 5.25E-14 | 43  |
| NNU_27587 | 2403 | NNU_007918 | 2702 | 0.95 | 56  | 8.73E-17 | 48  |
| NNU_27587 | 2403 | NNU_022375 | 423  | 0.84 | 151 | 1.84E-33 | 78  |
| NNU_27587 | 2403 | NNU_004165 | 551  | 0.82 | 237 | 2.31E-52 | 112 |
| NNU_27587 | 2403 | NNU_007206 | 747  | 0.86 | 76  | 1.46E-14 | 44  |
| NNU_27587 | 2403 | NNU_001683 | 2407 | 0.94 | 93  | 2.38E-32 | 76  |
| NNU_27587 | 2403 | NNU_021170 | 498  | 0.85 | 118 | 3.09E-26 | 65  |
| NNU_27587 | 2403 | NNU_015793 | 441  | 1.00 | 32  | 1.90E-08 | 33  |
| NNU_27587 | 2403 | NNU_008167 | 1470 | 0.89 | 173 | 1.79E-53 | 114 |
| NNU_27587 | 2403 | NNU_001444 | 744  | 0.83 | 169 | 3.95E-35 | 81  |
| NNU_27587 | 2403 | NNU_019042 | 540  | 0.80 | 225 | 3.05E-36 | 83  |
| NNU_27587 | 2403 | NNU_001633 | 924  | 0.85 | 150 | 1.10E-35 | 82  |
| NNU_27587 | 2403 | NNU_016201 | 3092 | 0.83 | 177 | 1.41E-39 | 89  |
| NNU_27587 | 2403 | NNU_004544 | 413  | 0.87 | 196 | 8.25E-57 | 120 |
| NNU_27587 | 2403 | NNU_007420 | 687  | 0.82 | 200 | 3.92E-40 | 90  |
| NNU_27587 | 2403 | NNU_006479 | 1491 | 0.84 | 92  | 8.73E-17 | 48  |
| NNU_27587 | 2403 | NNU_016672 | 387  | 1.00 | 32  | 1.90E-08 | 33  |
| NNU_27587 | 2403 | NNU_003572 | 359  | 0.82 | 248 | 3.86E-50 | 108 |
| NNU_27587 | 2403 | NNU_022949 | 352  | 0.83 | 100 | 8.73E-17 | 48  |
| NNU_27587 | 2403 | NNU_004982 | 345  | 0.88 | 126 | 3.95E-35 | 81  |
| NNU_27587 | 2403 | NNU_007322 | 430  | 0.83 | 100 | 1.88E-18 | 51  |
| NNU_27587 | 2403 | NNU_007419 | 350  | 0.87 | 90  | 4.03E-20 | 54  |
| NNU_27587 | 2403 | NNU_018992 | 459  | 0.78 | 267 | 1.41E-39 | 89  |
| NNU_27587 | 2403 | NNU_006747 | 480  | 0.85 | 105 | 2.41E-22 | 58  |
| NNU_27587 | 2403 | NNU_013480 | 687  | 0.80 | 267 | 1.07E-50 | 109 |
| NNU_27587 | 2403 | NNU_015836 | 555  | 0.91 | 44  | 1.90E-08 | 33  |
| NNU_27587 | 2403 | NNU_015825 | 482  | 0.86 | 98  | 8.67E-22 | 57  |
| NNU_27587 | 2403 | NNU_015226 | 534  | 0.85 | 98  | 4.03E-20 | 54  |
| NNU_27587 | 2403 | NNU_018474 | 305  | 0.88 | 135 | 1.41E-39 | 89  |
| NNU_27587 | 2403 | NNU_010144 | 437  | 0.86 | 111 | 2.39E-27 | 67  |
| NNU_27587 | 2403 | NNU_013479 | 632  | 0.78 | 301 | 1.39E-49 | 107 |
| NNU_27587 | 2403 | NNU_017907 | 360  | 0.87 | 90  | 4.03E-20 | 54  |
| NNU_27587 | 2403 | NNU_016987 | 353  | 0.78 | 246 | 6.61E-33 | 77  |
| NNU_27587 | 2403 | NNU_025816 | 339  | 0.84 | 90  | 5.25E-14 | 43  |
| NNU_27587 | 2403 | NNU_002162 | 339  | 0.79 | 183 | 2.39E-27 | 67  |
| NNU_27587 | 2403 | NNU_005976 | 616  | 0.82 | 207 | 6.51E-43 | 95  |
| NNU_27587 | 2403 | NNU_015186 | 287  | 0.88 | 128 | 8.48E-37 | 84  |
| NNU_27587 | 2403 | NNU_017062 | 341  | 0.86 | 75  | 5.25E-14 | 43  |
| NNU_27587 | 2403 | NNU_025369 | 564  | 0.86 | 87  | 6.75E-18 | 50  |

|           |      |            |      |      |     |           |     |
|-----------|------|------------|------|------|-----|-----------|-----|
| NNU_27587 | 2403 | NNU_021129 | 1320 | 0.87 | 90  | 4.03E-20  | 54  |
| NNU_27587 | 2403 | NNU_000752 | 673  | 0.83 | 100 | 1.88E-18  | 51  |
| NNU_27587 | 2403 | NNU_025626 | 420  | 0.81 | 94  | 6.79E-13  | 41  |
| NNU_27587 | 2403 | NNU_015837 | 564  | 0.82 | 92  | 1.89E-13  | 42  |
| NNU_27587 | 2403 | NNU_019043 | 328  | 0.85 | 108 | 5.18E-24  | 61  |
| NNU_27587 | 2403 | NNU_004778 | 380  | 0.93 | 58  | 3.14E-16  | 47  |
| NNU_27587 | 2403 | NNU_016831 | 409  | 0.77 | 239 | 2.39E-27  | 67  |
| NNU_27587 | 2403 | NNU_013908 | 234  | 0.86 | 90  | 1.88E-18  | 51  |
| NNU_27587 | 2403 | NNU_019020 | 344  | 0.80 | 124 | 6.75E-18  | 50  |
| NNU_27587 | 2403 | NNU_004010 | 351  | 0.76 | 169 | 3.14E-16  | 47  |
| NNU_27587 | 2403 | NNU_016433 | 405  | 0.88 | 123 | 5.11E-34  | 79  |
| NNU_27587 | 2403 | NNU_021030 | 837  | 0.83 | 98  | 8.73E-17  | 48  |
| NNU_27587 | 2403 | NNU_010609 | 267  | 0.84 | 128 | 6.65E-28  | 68  |
| NNU_27587 | 2403 | NNU_025207 | 540  | 0.79 | 122 | 1.13E-15  | 46  |
| NNU_27587 | 2403 | NNU_024125 | 225  | 0.85 | 104 | 8.67E-22  | 57  |
| NNU_27587 | 2403 | NNU_002516 | 1158 | 0.90 | 88  | 1.44E-24  | 62  |
| NNU_27587 | 2403 | NNU_022647 | 499  | 0.93 | 87  | 5.14E-29  | 70  |
| NNU_27587 | 2403 | NNU_019901 | 248  | 0.84 | 78  | 2.44E-12  | 40  |
| NNU_27587 | 2403 | NNU_010664 | 378  | 0.78 | 92  | 1.90E-08  | 33  |
| NNU_27587 | 2403 | NNU_019582 | 441  | 0.95 | 77  | 8.61E-27  | 66  |
| NNU_27587 | 2403 | NNU_006183 | 225  | 0.86 | 58  | 1.47E-09  | 35  |
| NNU_27587 | 2403 | NNU_023030 | 500  | 0.97 | 68  | 4.00E-25  | 63  |
| NNU_27587 | 2403 | NNU_000692 | 588  | 0.76 | 204 | 2.41E-22  | 58  |
| NNU_27587 | 2403 | NNU_010706 | 511  | 0.79 | 147 | 1.45E-19  | 53  |
| NNU_27587 | 2403 | NNU_010886 | 279  | 0.80 | 127 | 1.88E-18  | 51  |
| NNU_27587 | 2403 | NNU_003121 | 619  | 0.86 | 87  | 6.75E-18  | 50  |
| NNU_27587 | 2403 | NNU_018477 | 960  | 0.76 | 173 | 2.44E-12  | 40  |
| NNU_27587 | 2403 | NNU_012332 | 615  | 0.85 | 88  | 5.25E-14  | 43  |
| NNU_27587 | 2403 | NNU_017098 | 386  | 0.90 | 59  | 1.89E-13  | 42  |
| NNU_27587 | 2403 | NNU_000606 | 414  | 0.89 | 62  | 1.89E-13  | 42  |
| NNU_27587 | 2403 | NNU_017705 | 304  | 0.76 | 144 | 8.79E-12  | 39  |
| NNU_27587 | 2403 | NNU_017938 | 277  | 0.97 | 36  | 5.29E-09  | 34  |
| NNU_27587 | 2403 | NNU_011351 | 1155 | 0.97 | 33  | 2.46E-07  | 31  |
| NNU_27588 | 2323 | NNU_012316 | 729  | 0.93 | 269 | 2.67E-106 | 209 |
| NNU_27588 | 2323 | NNU_003745 | 1275 | 0.91 | 206 | 3.60E-75  | 153 |
| NNU_27590 | 2368 | NNU_026178 | 1896 | 0.94 | 98  | 3.89E-35  | 81  |
| NNU_27590 | 2368 | NNU_001897 | 1028 | 0.84 | 113 | 2.37E-22  | 58  |
| NNU_27590 | 2368 | NNU_015247 | 624  | 0.95 | 41  | 4.03E-10  | 36  |
| NNU_27592 | 2221 | NNU_022014 | 1998 | 0.89 | 144 | 1.29E-44  | 98  |
| NNU_27592 | 2221 | NNU_019873 | 1204 | 0.88 | 148 | 1.67E-43  | 96  |
| NNU_27592 | 2221 | NNU_017130 | 705  | 1.00 | 33  | 4.88E-09  | 34  |
| NNU_27598 | 4353 | NNU_015987 | 1887 | 0.92 | 170 | 1.49E-61  | 129 |
| NNU_27598 | 4353 | NNU_006037 | 1923 | 0.80 | 169 | 5.63E-26  | 65  |
| NNU_27599 | 3507 | NNU_002015 | 5061 | 0.93 | 552 | 0         | 442 |

|           |      |            |      |      |      |           |     |
|-----------|------|------------|------|------|------|-----------|-----|
| NNU_27599 | 3507 | NNU_004779 | 3289 | 0.90 | 196  | 9.20E-68  | 140 |
| NNU_27600 | 817  | NNU_021561 | 1383 | 0.96 | 113  | 3.61E-46  | 100 |
| NNU_27601 | 3848 | NNU_015919 | 6104 | 0.93 | 82   | 4.97E-26  | 65  |
| NNU_27601 | 3848 | NNU_000970 | 2641 | 0.93 | 56   | 6.52E-15  | 45  |
| NNU_27603 | 968  | NNU_023709 | 1481 | 0.80 | 588  | 3.89E-116 | 226 |
| NNU_27605 | 949  | NNU_014922 | 1433 | 0.88 | 168  | 1.51E-45  | 99  |
| NNU_27607 | 3608 | NNU_023483 | 327  | 0.96 | 87   | 9.94E-33  | 77  |
| NNU_27609 | 1038 | NNU_022546 | 842  | 0.96 | 44   | 3.75E-12  | 39  |
| NNU_27611 | 1569 | NNU_024580 | 2493 | 0.86 | 491  | 6.10E-146 | 280 |
| NNU_27615 | 1868 | NNU_014495 | 1994 | 0.92 | 62   | 6.76E-17  | 48  |
| NNU_27616 | 1184 | NNU_003058 | 3282 | 0.94 | 205  | 6.45E-85  | 170 |
| NNU_27616 | 1184 | NNU_013225 | 2031 | 0.87 | 258  | 1.10E-72  | 148 |
| NNU_27616 | 1184 | NNU_017408 | 1737 | 0.88 | 119  | 8.96E-34  | 78  |
| NNU_27620 | 2599 | NNU_020668 | 4831 | 0.83 | 1045 | 0         | 498 |
| NNU_27620 | 2599 | NNU_017676 | 734  | 0.90 | 174  | 5.34E-59  | 124 |
| NNU_27624 | 2718 | NNU_009055 | 2313 | 0.95 | 117  | 1.23E-45  | 100 |
| NNU_27626 | 1991 | NNU_012859 | 939  | 0.93 | 392  | 2.73E-160 | 306 |
| NNU_27633 | 1507 | NNU_010827 | 2468 | 0.92 | 78   | 3.23E-24  | 61  |
| NNU_27636 | 2181 | NNU_021310 | 2371 | 0.98 | 108  | 2.11E-47  | 103 |
| NNU_27639 | 1418 | NNU_002434 | 708  | 0.85 | 295  | 1.30E-82  | 166 |
| NNU_27640 | 7260 | NNU_023248 | 3440 | 0.95 | 149  | 1.16E-59  | 126 |
| NNU_27642 | 2338 | NNU_020402 | 1894 | 0.83 | 246  | 3.73E-55  | 117 |
| NNU_27642 | 2338 | NNU_017877 | 1472 | 0.87 | 110  | 1.80E-28  | 69  |
| NNU_27642 | 2338 | NNU_019144 | 2645 | 0.89 | 78   | 1.82E-18  | 51  |
| NNU_27642 | 2338 | NNU_017273 | 368  | 0.83 | 68   | 1.85E-08  | 33  |
| NNU_27642 | 2338 | NNU_014471 | 4021 | 0.89 | 43   | 8.61E-07  | 30  |
| NNU_27647 | 5299 | NNU_015858 | 2227 | 0.95 | 106  | 1.87E-41  | 93  |
| NNU_27647 | 5299 | NNU_000462 | 630  | 1.00 | 29   | 1.96E-06  | 30  |
| NNU_27650 | 1781 | NNU_017478 | 2936 | 0.93 | 138  | 7.93E-51  | 109 |
| NNU_27650 | 1781 | NNU_007466 | 423  | 0.95 | 54   | 8.34E-16  | 46  |
| NNU_27653 | 2543 | NNU_025522 | 876  | 0.93 | 122  | 6.90E-43  | 95  |
| NNU_27654 | 5113 | NNU_022260 | 1308 | 0.85 | 176  | 1.39E-42  | 95  |
| NNU_27654 | 5113 | NNU_011450 | 2220 | 0.84 | 176  | 5.01E-42  | 94  |
| NNU_27657 | 4209 | NNU_022274 | 1099 | 0.95 | 334  | 1.28E-146 | 282 |
| NNU_27657 | 4209 | NNU_001967 | 4057 | 0.97 | 272  | 1.31E-126 | 246 |
| NNU_27657 | 4209 | NNU_010315 | 1133 | 0.96 | 252  | 3.73E-112 | 220 |
| NNU_27657 | 4209 | NNU_013035 | 1521 | 0.95 | 252  | 8.07E-109 | 214 |
| NNU_27657 | 4209 | NNU_004639 | 651  | 0.94 | 252  | 3.76E-107 | 211 |
| NNU_27657 | 4209 | NNU_013555 | 198  | 0.97 | 108  | 1.90E-45  | 100 |
| NNU_27657 | 4209 | NNU_012123 | 1374 | 0.98 | 95   | 6.89E-40  | 90  |
| NNU_27660 | 6674 | NNU_017502 | 4259 | 0.93 | 131  | 6.50E-47  | 103 |
| NNU_27661 | 1632 | NNU_017478 | 2936 | 0.93 | 138  | 7.26E-51  | 109 |
| NNU_27661 | 1632 | NNU_007466 | 423  | 0.95 | 54   | 7.63E-16  | 46  |
| NNU_27668 | 1057 | NNU_007378 | 1017 | 0.90 | 164  | 2.16E-54  | 115 |



|           |      |            |      |      |     |           |     |
|-----------|------|------------|------|------|-----|-----------|-----|
| NNU_27669 | 1291 | NNU_011955 | 1354 | 0.93 | 68  | 2.15E-20  | 54  |
| NNU_27673 | 2348 | NNU_020635 | 955  | 0.87 | 361 | 4.45E-114 | 223 |
| NNU_27673 | 2348 | NNU_016892 | 651  | 0.93 | 149 | 3.75E-55  | 117 |
| NNU_27673 | 2348 | NNU_021346 | 1875 | 0.82 | 78  | 3.99E-10  | 36  |
| NNU_27673 | 2348 | NNU_015263 | 879  | 1.00 | 31  | 6.68E-08  | 32  |
| NNU_27674 | 2084 | NNU_020629 | 465  | 0.95 | 263 | 3.05E-115 | 225 |
| NNU_27674 | 2084 | NNU_017155 | 656  | 0.88 | 324 | 5.14E-108 | 212 |
| NNU_27674 | 2084 | NNU_016040 | 2194 | 0.99 | 85  | 2.64E-36  | 83  |
| NNU_27674 | 2084 | NNU_010522 | 996  | 0.92 | 70  | 1.26E-19  | 53  |
| NNU_27677 | 974  | NNU_016692 | 1244 | 0.93 | 971 | 0         | 774 |
| NNU_27680 | 4519 | NNU_005729 | 1706 | 0.90 | 87  | 9.78E-24  | 61  |
| NNU_27680 | 4519 | NNU_014878 | 2550 | 0.96 | 54  | 1.65E-16  | 48  |
| NNU_27680 | 4519 | NNU_011461 | 2998 | 0.78 | 102 | 1.29E-07  | 32  |
| NNU_27681 | 792  | NNU_008440 | 3497 | 0.82 | 135 | 2.80E-22  | 57  |
| NNU_27682 | 2049 | NNU_015235 | 891  | 0.97 | 89  | 3.36E-35  | 81  |
| NNU_27682 | 2049 | NNU_022533 | 223  | 1.00 | 49  | 5.74E-18  | 50  |
| NNU_27682 | 2049 | NNU_014093 | 303  | 0.96 | 53  | 2.67E-16  | 47  |
| NNU_27682 | 2049 | NNU_020882 | 885  | 0.96 | 45  | 5.78E-13  | 41  |
| NNU_27684 | 948  | NNU_014476 | 1638 | 0.90 | 157 | 3.23E-52  | 111 |
| NNU_27684 | 948  | NNU_023822 | 1630 | 0.92 | 131 | 3.25E-47  | 102 |
| NNU_27686 | 944  | NNU_006462 | 1350 | 0.82 | 219 | 9.00E-48  | 103 |
| NNU_27689 | 888  | NNU_002303 | 1584 | 0.92 | 100 | 2.40E-33  | 77  |
| NNU_27689 | 888  | NNU_007886 | 855  | 0.83 | 246 | 8.33E-58  | 121 |
| NNU_27689 | 888  | NNU_002301 | 2170 | 0.90 | 168 | 1.39E-55  | 117 |
| NNU_27689 | 888  | NNU_026274 | 1977 | 0.89 | 100 | 2.42E-28  | 68  |
| NNU_27689 | 888  | NNU_016111 | 568  | 0.99 | 68  | 3.13E-27  | 66  |
| NNU_27691 | 1038 | NNU_022560 | 1183 | 0.91 | 159 | 4.55E-56  | 118 |
| NNU_27692 | 983  | NNU_021251 | 2214 | 0.93 | 405 | 1.70E-169 | 322 |
| NNU_27692 | 983  | NNU_011226 | 2535 | 0.82 | 441 | 3.12E-102 | 201 |
| NNU_27692 | 983  | NNU_011227 | 488  | 0.98 | 56  | 1.63E-20  | 54  |
| NNU_27696 | 2753 | NNU_006076 | 2741 | 0.91 | 267 | 5.34E-99  | 196 |
| NNU_27699 | 2668 | NNU_014662 | 3165 | 0.97 | 222 | 1.43E-104 | 206 |
| NNU_27699 | 2668 | NNU_003926 | 4078 | 0.96 | 107 | 2.01E-43  | 96  |
| NNU_27699 | 2668 | NNU_001382 | 2592 | 0.98 | 63  | 5.76E-24  | 61  |
| NNU_27699 | 2668 | NNU_002436 | 2286 | 0.96 | 65  | 9.63E-22  | 57  |
| NNU_27701 | 1395 | NNU_020911 | 1942 | 0.83 | 465 | 2.64E-109 | 214 |
| NNU_27701 | 1395 | NNU_024020 | 675  | 0.83 | 238 | 4.78E-52  | 111 |
| NNU_27701 | 1395 | NNU_001772 | 894  | 0.88 | 160 | 1.04E-48  | 105 |
| NNU_27702 | 2545 | NNU_019707 | 3183 | 0.86 | 105 | 5.49E-24  | 61  |
| NNU_27702 | 2545 | NNU_000908 | 1704 | 1.00 | 28  | 3.37E-06  | 29  |
| NNU_27703 | 1544 | NNU_022743 | 5044 | 0.85 | 422 | 3.77E-113 | 221 |
| NNU_27704 | 377  | NNU_020501 | 1689 | 0.88 | 126 | 1.63E-36  | 82  |
| NNU_27705 | 787  | NNU_002086 | 3983 | 0.94 | 121 | 3.47E-46  | 100 |
| NNU_27705 | 787  | NNU_013333 | 4081 | 0.97 | 38  | 1.31E-10  | 36  |

|           |      |            |      |      |     |           |     |
|-----------|------|------------|------|------|-----|-----------|-----|
| NNU_27706 | 2398 | NNU_012991 | 889  | 0.84 | 342 | 1.01E-90  | 181 |
| NNU_27709 | 824  | NNU_002746 | 588  | 0.85 | 324 | 9.50E-92  | 182 |
| NNU_27710 | 1482 | NNU_002734 | 1272 | 0.77 | 617 | 4.84E-87  | 174 |
| NNU_27713 | 4432 | NNU_009407 | 1035 | 0.88 | 451 | 6.21E-150 | 288 |
| NNU_27713 | 4432 | NNU_017435 | 1029 | 0.87 | 86  | 7.47E-20  | 54  |
| NNU_27714 | 1696 | NNU_021251 | 2214 | 0.93 | 405 | 2.96E-169 | 322 |
| NNU_27714 | 1696 | NNU_011227 | 488  | 0.94 | 282 | 4.11E-118 | 230 |
| NNU_27714 | 1696 | NNU_011226 | 2535 | 0.94 | 124 | 1.63E-47  | 103 |
| NNU_27714 | 1696 | NNU_007456 | 3350 | 0.90 | 162 | 1.62E-52  | 112 |
| NNU_27714 | 1696 | NNU_023931 | 3240 | 0.88 | 93  | 2.19E-21  | 56  |
| NNU_27715 | 900  | NNU_017482 | 1358 | 0.94 | 99  | 4.04E-36  | 82  |
| NNU_27715 | 900  | NNU_012576 | 1794 | 0.93 | 82  | 1.14E-26  | 65  |
| NNU_27720 | 852  | NNU_011649 | 1149 | 0.89 | 220 | 1.01E-71  | 146 |
| NNU_27723 | 3528 | NNU_008009 | 1538 | 0.91 | 269 | 3.19E-97  | 193 |
| NNU_27723 | 3528 | NNU_016581 | 2166 | 0.93 | 262 | 1.13E-106 | 210 |
| NNU_27723 | 3528 | NNU_007143 | 428  | 0.90 | 87  | 7.62E-24  | 61  |
| NNU_27723 | 3528 | NNU_000248 | 1086 | 0.91 | 181 | 1.56E-60  | 127 |
| NNU_27723 | 3528 | NNU_013013 | 1606 | 0.76 | 216 | 4.59E-21  | 56  |
| NNU_27724 | 1118 | NNU_026054 | 1862 | 0.90 | 401 | 2.01E-144 | 277 |
| NNU_27724 | 1118 | NNU_021184 | 740  | 0.93 | 202 | 2.85E-78  | 158 |
| NNU_27724 | 1118 | NNU_008267 | 1284 | 0.91 | 194 | 8.04E-69  | 141 |
| NNU_27724 | 1118 | NNU_011752 | 551  | 0.97 | 99  | 5.01E-41  | 91  |
| NNU_27730 | 869  | NNU_008028 | 788  | 0.91 | 138 | 2.30E-48  | 104 |
| NNU_27730 | 869  | NNU_014978 | 3620 | 0.88 | 80  | 6.67E-19  | 51  |
| NNU_27733 | 591  | NNU_018421 | 1628 | 0.87 | 450 | 1.76E-137 | 264 |
| NNU_27734 | 879  | NNU_014626 | 1159 | 0.95 | 175 | 2.24E-73  | 149 |
| NNU_27735 | 616  | NNU_014616 | 819  | 0.85 | 256 | 3.36E-70  | 143 |
| NNU_27736 | 5465 | NNU_016879 | 1170 | 0.81 | 141 | 4.26E-23  | 60  |
| NNU_27738 | 1083 | NNU_015982 | 322  | 0.84 | 315 | 1.28E-81  | 164 |
| NNU_27740 | 2504 | NNU_002653 | 2707 | 0.83 | 117 | 3.25E-21  | 56  |
| NNU_27740 | 2504 | NNU_011106 | 3772 | 0.80 | 117 | 3.27E-16  | 47  |
| NNU_27740 | 2504 | NNU_022917 | 2152 | 0.92 | 65  | 1.96E-18  | 51  |
| NNU_27740 | 2504 | NNU_000944 | 2282 | 0.78 | 117 | 3.30E-11  | 38  |
| NNU_27740 | 2504 | NNU_006968 | 1126 | 1.00 | 34  | 1.53E-09  | 35  |
| NNU_27740 | 2504 | NNU_000616 | 1798 | 0.97 | 36  | 5.51E-09  | 34  |
| NNU_27740 | 2504 | NNU_020232 | 1772 | 1.00 | 29  | 9.23E-07  | 30  |
| NNU_27746 | 844  | NNU_013963 | 1894 | 0.87 | 504 | 1.49E-154 | 295 |
| NNU_27748 | 506  | NNU_024326 | 1806 | 0.97 | 174 | 4.53E-78  | 157 |
| NNU_27748 | 506  | NNU_023166 | 679  | 0.94 | 180 | 4.56E-73  | 148 |
| NNU_27751 | 608  | NNU_020635 | 955  | 1.00 | 39  | 6.00E-13  | 40  |
| NNU_27751 | 608  | NNU_015481 | 1327 | 0.98 | 39  | 2.79E-11  | 37  |
| NNU_27751 | 608  | NNU_009893 | 1567 | 0.90 | 112 | 3.48E-35  | 80  |
| NNU_27751 | 608  | NNU_023123 | 1803 | 0.93 | 88  | 3.51E-30  | 71  |
| NNU_27751 | 608  | NNU_021346 | 1875 | 1.00 | 70  | 3.51E-30  | 71  |

|           |      |            |      |      |     |           |     |
|-----------|------|------------|------|------|-----|-----------|-----|
| NNU_27751 | 608  | NNU_003163 | 4594 | 0.97 | 59  | 9.90E-21  | 54  |
| NNU_27751 | 608  | NNU_016892 | 651  | 0.90 | 58  | 4.64E-14  | 42  |
| NNU_27751 | 608  | NNU_008505 | 1910 | 1.00 | 39  | 6.00E-13  | 40  |
| NNU_27757 | 890  | NNU_006250 | 819  | 0.89 | 375 | 9.71E-132 | 254 |
| NNU_27757 | 890  | NNU_012140 | 1428 | 0.98 | 131 | 3.86E-61  | 127 |
| NNU_27757 | 890  | NNU_017618 | 518  | 0.95 | 128 | 3.02E-52  | 111 |
| NNU_27764 | 712  | NNU_007210 | 1792 | 0.91 | 430 | 1.23E-164 | 313 |
| NNU_27764 | 712  | NNU_008743 | 2063 | 0.88 | 474 | 1.60E-158 | 302 |
| NNU_27766 | 955  | NNU_014080 | 852  | 0.77 | 186 | 9.43E-23  | 58  |
| NNU_27766 | 955  | NNU_022480 | 864  | 0.89 | 108 | 4.33E-31  | 73  |
| NNU_27767 | 955  | NNU_015836 | 555  | 0.77 | 194 | 7.34E-19  | 51  |
| NNU_27767 | 955  | NNU_004165 | 551  | 0.75 | 230 | 2.64E-18  | 50  |
| NNU_27767 | 955  | NNU_011522 | 478  | 0.78 | 154 | 1.23E-16  | 47  |
| NNU_27767 | 955  | NNU_023441 | 708  | 0.78 | 154 | 4.42E-16  | 46  |
| NNU_27767 | 955  | NNU_002162 | 339  | 0.76 | 209 | 1.59E-15  | 45  |
| NNU_27767 | 955  | NNU_015837 | 564  | 0.77 | 148 | 2.66E-13  | 41  |
| NNU_27773 | 888  | NNU_019144 | 2645 | 0.91 | 248 | 1.03E-91  | 182 |
| NNU_27773 | 888  | NNU_011357 | 700  | 0.78 | 165 | 3.17E-17  | 48  |
| NNU_27773 | 888  | NNU_010333 | 868  | 0.98 | 51  | 8.82E-18  | 49  |
| NNU_27775 | 5032 | NNU_021231 | 543  | 0.83 | 205 | 6.33E-46  | 101 |
| NNU_27775 | 5032 | NNU_016970 | 1221 | 0.99 | 74  | 8.36E-30  | 72  |
| NNU_27775 | 5032 | NNU_023731 | 204  | 0.96 | 45  | 5.14E-12  | 40  |
| NNU_27775 | 5032 | NNU_000795 | 6599 | 0.97 | 31  | 6.70E-06  | 29  |
| NNU_27776 | 1461 | NNU_000353 | 2331 | 0.96 | 266 | 4.54E-122 | 237 |
| NNU_27777 | 1535 | NNU_023123 | 1803 | 0.95 | 80  | 1.17E-28  | 69  |
| NNU_27778 | 1723 | NNU_004089 | 1847 | 0.95 | 172 | 1.24E-73  | 150 |
| NNU_27778 | 1723 | NNU_014193 | 2476 | 0.98 | 168 | 1.59E-77  | 157 |
| NNU_27779 | 3007 | NNU_015881 | 1614 | 0.96 | 178 | 7.77E-78  | 158 |
| NNU_27779 | 3007 | NNU_008078 | 492  | 0.82 | 106 | 6.59E-14  | 43  |
| NNU_27780 | 902  | NNU_011418 | 633  | 0.98 | 376 | 0         | 359 |
| NNU_27780 | 902  | NNU_016490 | 492  | 0.86 | 185 | 1.43E-50  | 108 |
| NNU_27781 | 5156 | NNU_021231 | 543  | 0.97 | 37  | 3.17E-09  | 35  |
| NNU_27781 | 5156 | NNU_016970 | 1221 | 0.99 | 74  | 8.57E-30  | 72  |
| NNU_27781 | 5156 | NNU_023731 | 204  | 0.96 | 45  | 5.27E-12  | 40  |
| NNU_27781 | 5156 | NNU_000795 | 6599 | 0.97 | 31  | 6.87E-06  | 29  |
| NNU_27783 | 731  | NNU_002064 | 1194 | 0.87 | 345 | 2.30E-102 | 201 |
| NNU_27783 | 731  | NNU_011608 | 1282 | 0.88 | 177 | 6.86E-53  | 112 |
| NNU_27783 | 731  | NNU_011752 | 551  | 0.96 | 51  | 3.36E-16  | 46  |
| NNU_27783 | 731  | NNU_026054 | 1862 | 0.93 | 54  | 1.56E-14  | 43  |
| NNU_27786 | 950  | NNU_002064 | 1194 | 0.94 | 152 | 1.48E-60  | 126 |
| NNU_27786 | 950  | NNU_021357 | 1912 | 0.88 | 68  | 1.58E-15  | 45  |
| NNU_27790 | 1723 | NNU_013064 | 905  | 0.98 | 44  | 1.35E-13  | 42  |
| NNU_27791 | 2504 | NNU_014507 | 2971 | 0.94 | 376 | 1.24E-159 | 305 |
| NNU_27793 | 573  | NNU_018538 | 561  | 0.98 | 58  | 7.21E-22  | 56  |

|           |      |            |      |      |     |           |     |
|-----------|------|------------|------|------|-----|-----------|-----|
| NNU_27793 | 573  | NNU_002714 | 1336 | 0.98 | 58  | 7.21E-22  | 56  |
| NNU_27799 | 6404 | NNU_018705 | 1149 | 0.90 | 314 | 5.69E-112 | 220 |
| NNU_27799 | 6404 | NNU_026246 | 2310 | 0.90 | 314 | 1.23E-108 | 214 |
| NNU_27799 | 6404 | NNU_025786 | 2578 | 0.87 | 351 | 5.73E-107 | 211 |
| NNU_27799 | 6404 | NNU_018711 | 2412 | 0.83 | 404 | 2.09E-96  | 192 |
| NNU_27799 | 6404 | NNU_006009 | 2228 | 0.89 | 233 | 1.00E-74  | 153 |
| NNU_27799 | 6404 | NNU_006709 | 3256 | 0.84 | 297 | 3.60E-74  | 152 |
| NNU_27799 | 6404 | NNU_021593 | 2310 | 0.91 | 125 | 2.26E-41  | 93  |
| NNU_27799 | 6404 | NNU_019670 | 1557 | 0.93 | 103 | 8.18E-36  | 83  |
| NNU_27799 | 6404 | NNU_020739 | 1559 | 0.88 | 118 | 1.77E-32  | 77  |
| NNU_27799 | 6404 | NNU_018712 | 1788 | 0.96 | 75  | 6.41E-27  | 67  |
| NNU_27799 | 6404 | NNU_020985 | 2709 | 0.86 | 113 | 2.31E-26  | 66  |
| NNU_27799 | 6404 | NNU_001676 | 1042 | 0.93 | 72  | 2.32E-21  | 57  |
| NNU_27799 | 6404 | NNU_014349 | 2377 | 0.93 | 44  | 3.94E-09  | 35  |
| NNU_27820 | 4395 | NNU_003312 | 837  | 0.92 | 131 | 2.57E-44  | 98  |
| NNU_27820 | 4395 | NNU_020638 | 249  | 0.95 | 54  | 2.07E-15  | 46  |
| NNU_27823 | 776  | NNU_024384 | 3239 | 0.90 | 179 | 1.20E-60  | 126 |
| NNU_27824 | 1264 | NNU_002281 | 4928 | 0.94 | 104 | 3.42E-38  | 86  |
| NNU_27825 | 247  | NNU_025710 | 3204 | 0.94 | 108 | 1.03E-41  | 91  |
| NNU_27829 | 1075 | NNU_024551 | 1782 | 0.96 | 68  | 8.23E-24  | 60  |
| NNU_27830 | 1927 | NNU_005606 | 2043 | 0.92 | 777 | 0         | 586 |
| NNU_27833 | 1272 | NNU_019303 | 339  | 0.89 | 104 | 9.71E-29  | 69  |
| NNU_27833 | 1272 | NNU_026178 | 1896 | 0.93 | 42  | 2.78E-09  | 34  |
| NNU_27843 | 3782 | NNU_011432 | 1004 | 0.81 | 201 | 3.72E-37  | 85  |
| NNU_27843 | 3782 | NNU_009020 | 2526 | 0.92 | 109 | 4.82E-36  | 83  |
| NNU_27843 | 3782 | NNU_011126 | 1541 | 0.97 | 35  | 3.00E-08  | 33  |
| NNU_27843 | 3782 | NNU_020344 | 1952 | 0.87 | 69  | 8.29E-14  | 43  |
| NNU_27845 | 686  | NNU_010005 | 615  | 0.93 | 53  | 5.26E-14  | 42  |
| NNU_27846 | 2548 | NNU_025974 | 968  | 1.00 | 46  | 3.33E-16  | 47  |
| NNU_27849 | 966  | NNU_015440 | 669  | 0.80 | 541 | 2.35E-108 | 212 |
| NNU_27851 | 2342 | NNU_016670 | 3038 | 0.96 | 997 | 0         | 877 |
| NNU_27851 | 2342 | NNU_014847 | 3105 | 0.85 | 993 | 0         | 555 |
| NNU_27851 | 2342 | NNU_004264 | 4121 | 0.93 | 315 | 2.02E-127 | 247 |
| NNU_27851 | 2342 | NNU_003438 | 1074 | 0.97 | 36  | 5.15E-09  | 34  |
| NNU_27853 | 1170 | NNU_014427 | 1700 | 0.78 | 665 | 6.11E-115 | 224 |
| NNU_27854 | 664  | NNU_004683 | 602  | 0.93 | 99  | 1.37E-34  | 79  |
| NNU_27854 | 664  | NNU_024088 | 591  | 0.85 | 265 | 2.19E-67  | 138 |
| NNU_27854 | 664  | NNU_000669 | 3070 | 0.93 | 74  | 5.01E-24  | 60  |
| NNU_27854 | 664  | NNU_009077 | 111  | 0.95 | 57  | 6.53E-18  | 49  |
| NNU_27854 | 664  | NNU_024089 | 966  | 0.96 | 53  | 2.35E-17  | 48  |
| NNU_27858 | 3887 | NNU_020201 | 507  | 0.93 | 121 | 2.27E-44  | 98  |
| NNU_27858 | 3887 | NNU_022817 | 467  | 0.93 | 73  | 1.09E-22  | 59  |
| NNU_27858 | 3887 | NNU_023071 | 2152 | 0.97 | 38  | 6.64E-10  | 36  |
| NNU_27858 | 3887 | NNU_021066 | 480  | 0.95 | 75  | 1.81E-25  | 64  |

|           |      |            |      |      |     |           |     |
|-----------|------|------------|------|------|-----|-----------|-----|
| NNU_27858 | 3887 | NNU_022816 | 291  | 0.98 | 65  | 6.50E-25  | 63  |
| NNU_27858 | 3887 | NNU_010033 | 443  | 0.96 | 54  | 3.94E-17  | 49  |
| NNU_27859 | 2287 | NNU_016820 | 1452 | 1.00 | 28  | 3.03E-06  | 29  |
| NNU_27864 | 4203 | NNU_015465 | 2401 | 0.95 | 860 | 0         | 737 |
| NNU_27864 | 4203 | NNU_021070 | 1625 | 0.93 | 134 | 8.78E-49  | 106 |
| NNU_27864 | 4203 | NNU_026054 | 1862 | 0.88 | 156 | 2.46E-44  | 98  |
| NNU_27865 | 6840 | NNU_005451 | 2106 | 0.91 | 45  | 1.52E-08  | 34  |
| NNU_27865 | 6840 | NNU_014471 | 4021 | 1.00 | 32  | 5.45E-08  | 33  |
| NNU_27867 | 702  | NNU_001927 | 1219 | 0.90 | 187 | 5.02E-64  | 132 |
| NNU_27868 | 2687 | NNU_022726 | 2539 | 0.86 | 306 | 8.85E-87  | 174 |
| NNU_27869 | 6584 | NNU_005451 | 2106 | 0.91 | 45  | 1.46E-08  | 34  |
| NNU_27869 | 6584 | NNU_014471 | 4021 | 1.00 | 32  | 5.24E-08  | 33  |
| NNU_27871 | 2538 | NNU_016010 | 481  | 0.88 | 281 | 1.39E-89  | 179 |
| NNU_27871 | 2538 | NNU_005650 | 1854 | 0.94 | 84  | 5.43E-29  | 70  |
| NNU_27876 | 340  | NNU_024814 | 408  | 0.94 | 100 | 4.06E-37  | 83  |
| NNU_27876 | 340  | NNU_014813 | 807  | 0.95 | 55  | 4.18E-17  | 47  |
| NNU_27876 | 340  | NNU_016676 | 456  | 0.96 | 45  | 3.25E-13  | 40  |
| NNU_27881 | 4637 | NNU_000710 | 1088 | 0.97 | 96  | 3.53E-38  | 87  |
| NNU_27881 | 4637 | NNU_007596 | 462  | 0.89 | 96  | 7.76E-25  | 63  |
| NNU_27883 | 2004 | NNU_007872 | 3355 | 0.86 | 448 | 1.72E-132 | 256 |
| NNU_27884 | 1770 | NNU_024711 | 1437 | 0.81 | 88  | 1.08E-09  | 35  |
| NNU_27894 | 1910 | NNU_011403 | 537  | 0.90 | 230 | 1.37E-78  | 159 |
| NNU_27895 | 1191 | NNU_005567 | 1281 | 0.83 | 544 | 6.05E-135 | 260 |
| NNU_27895 | 1191 | NNU_016126 | 1035 | 0.80 | 704 | 9.91E-148 | 283 |
| NNU_27895 | 1191 | NNU_014558 | 1029 | 0.88 | 110 | 1.95E-30  | 72  |
| NNU_27897 | 1508 | NNU_018867 | 690  | 0.92 | 154 | 4.00E-53  | 113 |
| NNU_27898 | 7574 | NNU_005503 | 2607 | 0.76 | 285 | 1.26E-29  | 72  |
| NNU_27898 | 7574 | NNU_010865 | 6040 | 0.87 | 126 | 5.86E-28  | 69  |
| NNU_27898 | 7574 | NNU_008830 | 5597 | 0.82 | 149 | 4.56E-24  | 62  |
| NNU_27906 | 1440 | NNU_018867 | 690  | 0.92 | 155 | 1.06E-53  | 114 |
| NNU_27908 | 1978 | NNU_005580 | 1328 | 0.96 | 90  | 1.51E-33  | 78  |
| NNU_27908 | 1978 | NNU_016234 | 923  | 0.94 | 88  | 2.52E-31  | 74  |
| NNU_27909 | 1102 | NNU_016234 | 923  | 0.87 | 195 | 1.04E-57  | 121 |
| NNU_27909 | 1102 | NNU_025746 | 1260 | 0.87 | 173 | 1.75E-50  | 108 |
| NNU_27909 | 1102 | NNU_000166 | 4670 | 0.94 | 115 | 2.95E-43  | 95  |
| NNU_27909 | 1102 | NNU_011207 | 952  | 0.90 | 116 | 1.79E-35  | 81  |
| NNU_27909 | 1102 | NNU_018809 | 2653 | 0.88 | 116 | 3.87E-32  | 75  |
| NNU_27909 | 1102 | NNU_015540 | 999  | 0.85 | 132 | 1.80E-30  | 72  |
| NNU_27909 | 1102 | NNU_024930 | 1176 | 0.97 | 70  | 1.40E-26  | 65  |
| NNU_27911 | 747  | NNU_025063 | 931  | 0.92 | 200 | 1.13E-75  | 153 |
| NNU_27911 | 747  | NNU_010734 | 936  | 0.93 | 197 | 5.24E-79  | 159 |
| NNU_27911 | 747  | NNU_025640 | 372  | 0.92 | 185 | 1.14E-70  | 144 |
| NNU_27911 | 747  | NNU_022054 | 381  | 0.93 | 131 | 5.46E-49  | 105 |
| NNU_27912 | 2000 | NNU_018778 | 1633 | 0.87 | 186 | 4.12E-54  | 115 |

|           |      |            |      |      |     |           |     |
|-----------|------|------------|------|------|-----|-----------|-----|
| NNU_27912 | 2000 | NNU_011285 | 1338 | 0.84 | 166 | 5.45E-38  | 86  |
| NNU_27913 | 2756 | NNU_021132 | 403  | 0.93 | 110 | 2.09E-38  | 87  |
| NNU_27914 | 952  | NNU_002701 | 846  | 0.85 | 395 | 8.28E-113 | 220 |
| NNU_27916 | 1163 | NNU_014391 | 1290 | 0.83 | 221 | 2.41E-44  | 97  |
| NNU_27917 | 2967 | NNU_002701 | 846  | 0.98 | 44  | 2.34E-13  | 42  |
| NNU_27919 | 1865 | NNU_021207 | 1461 | 0.96 | 155 | 6.29E-67  | 138 |
| NNU_27919 | 1865 | NNU_006798 | 2454 | 0.83 | 196 | 1.40E-43  | 96  |
| NNU_27919 | 1865 | NNU_011863 | 1312 | 0.93 | 115 | 8.43E-41  | 91  |
| NNU_27919 | 1865 | NNU_011624 | 426  | 0.94 | 93  | 1.84E-32  | 76  |
| NNU_27919 | 1865 | NNU_026142 | 702  | 0.88 | 112 | 8.55E-31  | 73  |
| NNU_27919 | 1865 | NNU_016768 | 1308 | 0.93 | 88  | 1.11E-29  | 71  |
| NNU_27919 | 1865 | NNU_023275 | 669  | 0.98 | 60  | 1.86E-22  | 58  |
| NNU_27919 | 1865 | NNU_020594 | 1389 | 0.90 | 78  | 8.67E-21  | 55  |
| NNU_27921 | 2521 | NNU_025028 | 1847 | 0.90 | 216 | 1.09E-75  | 154 |
| NNU_27921 | 2521 | NNU_000649 | 1353 | 0.93 | 112 | 1.48E-39  | 89  |
| NNU_27921 | 2521 | NNU_007612 | 1801 | 0.85 | 276 | 1.82E-73  | 150 |
| NNU_27923 | 1872 | NNU_025089 | 1671 | 0.90 | 342 | 3.49E-124 | 241 |
| NNU_27924 | 2495 | NNU_015940 | 766  | 1.00 | 32  | 1.98E-08  | 33  |
| NNU_27924 | 2495 | NNU_002813 | 1845 | 0.97 | 35  | 1.98E-08  | 33  |
| NNU_27924 | 2495 | NNU_013804 | 5355 | 0.97 | 35  | 1.98E-08  | 33  |
| NNU_27924 | 2495 | NNU_012525 | 2229 | 1.00 | 31  | 7.11E-08  | 32  |
| NNU_27924 | 2495 | NNU_006133 | 1971 | 0.95 | 35  | 9.19E-07  | 30  |
| NNU_27930 | 279  | NNU_011677 | 240  | 0.95 | 202 | 3.05E-87  | 173 |
| NNU_27935 | 368  | NNU_026208 | 2283 | 0.91 | 116 | 1.23E-37  | 84  |
| NNU_27941 | 5402 | NNU_018290 | 4967 | 0.79 | 524 | 2.31E-85  | 172 |
| NNU_27941 | 5402 | NNU_008990 | 1250 | 0.79 | 253 | 5.29E-42  | 94  |
| NNU_27941 | 5402 | NNU_024338 | 2566 | 0.92 | 107 | 8.92E-35  | 81  |
| NNU_27941 | 5402 | NNU_004797 | 1906 | 0.91 | 88  | 5.41E-27  | 67  |
| NNU_27941 | 5402 | NNU_015993 | 3325 | 0.87 | 100 | 9.05E-25  | 63  |
| NNU_27941 | 5402 | NNU_022137 | 4555 | 0.96 | 70  | 3.25E-24  | 62  |
| NNU_27941 | 5402 | NNU_005327 | 2341 | 0.92 | 82  | 3.25E-24  | 62  |
| NNU_27941 | 5402 | NNU_016507 | 1238 | 0.84 | 98  | 5.48E-17  | 49  |
| NNU_27941 | 5402 | NNU_001653 | 1563 | 0.86 | 78  | 2.55E-15  | 46  |
| NNU_27942 | 1002 | NNU_020887 | 1011 | 0.95 | 352 | 1.77E-154 | 295 |
| NNU_27942 | 1002 | NNU_019388 | 3006 | 1.00 | 32  | 7.83E-09  | 33  |
| NNU_27947 | 1639 | NNU_007519 | 1714 | 0.95 | 65  | 5.88E-22  | 57  |
| NNU_27948 | 972  | NNU_011450 | 2220 | 0.96 | 56  | 7.48E-19  | 51  |
| NNU_27948 | 972  | NNU_018295 | 1659 | 0.89 | 53  | 1.63E-10  | 36  |
| NNU_27949 | 3800 | NNU_015919 | 6104 | 0.95 | 36  | 3.90E-07  | 31  |
| NNU_27950 | 2434 | NNU_009733 | 465  | 0.87 | 180 | 2.34E-52  | 112 |
| NNU_27955 | 6555 | NNU_022546 | 842  | 0.97 | 66  | 1.42E-23  | 61  |
| NNU_27955 | 6555 | NNU_012624 | 2304 | 0.93 | 53  | 5.18E-13  | 42  |
| NNU_27956 | 1615 | NNU_004937 | 2734 | 0.90 | 255 | 2.44E-90  | 180 |
| NNU_27956 | 1615 | NNU_014046 | 678  | 0.88 | 255 | 2.48E-80  | 162 |

|           |      |            |      |      |     |           |     |
|-----------|------|------------|------|------|-----|-----------|-----|
| NNU_27956 | 1615 | NNU_010614 | 2304 | 0.95 | 41  | 2.73E-10  | 36  |
| NNU_27957 | 2401 | NNU_018049 | 1542 | 0.90 | 170 | 8.24E-57  | 120 |
| NNU_27959 | 866  | NNU_022613 | 929  | 0.88 | 232 | 2.86E-72  | 147 |
| NNU_27960 | 781  | NNU_001534 | 1822 | 0.86 | 338 | 1.92E-98  | 194 |
| NNU_27961 | 1885 | NNU_010935 | 908  | 0.87 | 321 | 7.83E-101 | 199 |
| NNU_27962 | 615  | NNU_024473 | 866  | 0.91 | 150 | 2.67E-51  | 109 |
| NNU_27963 | 1261 | NNU_007430 | 3771 | 0.98 | 98  | 4.38E-42  | 93  |
| NNU_27963 | 1261 | NNU_007412 | 1770 | 0.76 | 485 | 2.56E-59  | 124 |
| NNU_27969 | 4321 | NNU_002559 | 3905 | 0.81 | 656 | 1.32E-141 | 273 |
| NNU_27969 | 4321 | NNU_019253 | 977  | 0.98 | 210 | 6.50E-100 | 198 |
| NNU_27970 | 420  | NNU_010836 | 1176 | 0.98 | 102 | 3.02E-44  | 96  |
| NNU_27971 | 967  | NNU_017710 | 998  | 0.95 | 188 | 1.47E-80  | 162 |
| NNU_27971 | 967  | NNU_022987 | 1672 | 0.96 | 202 | 2.42E-88  | 176 |
| NNU_27971 | 967  | NNU_010778 | 2015 | 0.91 | 187 | 1.16E-66  | 137 |
| NNU_27971 | 967  | NNU_018356 | 1248 | 0.95 | 92  | 7.28E-34  | 78  |
| NNU_27972 | 840  | NNU_017936 | 2380 | 0.79 | 372 | 1.68E-64  | 133 |
| NNU_27972 | 840  | NNU_017941 | 2109 | 0.78 | 372 | 1.69E-59  | 124 |
| NNU_27977 | 1742 | NNU_010696 | 1587 | 0.93 | 278 | 7.13E-111 | 217 |
| NNU_27977 | 1742 | NNU_008882 | 1110 | 0.94 | 65  | 1.05E-19  | 53  |
| NNU_27979 | 1036 | NNU_026103 | 570  | 0.90 | 406 | 1.43E-150 | 288 |
| NNU_27979 | 1036 | NNU_017976 | 571  | 1.00 | 29  | 3.77E-07  | 30  |
| NNU_27980 | 3533 | NNU_000638 | 2162 | 0.91 | 148 | 7.37E-49  | 106 |
| NNU_27980 | 3533 | NNU_012838 | 2072 | 0.75 | 452 | 3.43E-47  | 103 |
| NNU_27980 | 3533 | NNU_002583 | 882  | 0.97 | 36  | 7.80E-09  | 34  |
| NNU_27982 | 1543 | NNU_007987 | 2895 | 0.92 | 329 | 7.92E-130 | 251 |
| NNU_27985 | 1244 | NNU_005602 | 5230 | 0.93 | 275 | 1.09E-112 | 220 |
| NNU_27985 | 1244 | NNU_004123 | 1319 | 0.93 | 99  | 2.62E-34  | 79  |
| NNU_27985 | 1244 | NNU_003085 | 1122 | 0.91 | 99  | 5.67E-31  | 73  |
| NNU_27986 | 984  | NNU_006803 | 487  | 0.89 | 82  | 1.26E-21  | 56  |
| NNU_27987 | 528  | NNU_019316 | 295  | 0.92 | 224 | 7.81E-86  | 171 |
| NNU_27987 | 528  | NNU_006803 | 487  | 0.91 | 226 | 4.70E-83  | 166 |
| NNU_27996 | 2848 | NNU_019794 | 1320 | 0.91 | 312 | 5.38E-119 | 232 |
| NNU_27997 | 1017 | NNU_016317 | 984  | 1.00 | 60  | 2.16E-24  | 61  |
| NNU_27998 | 399  | NNU_025284 | 195  | 0.96 | 194 | 1.62E-86  | 172 |
| NNU_27999 | 580  | NNU_014389 | 8136 | 0.97 | 35  | 4.46E-09  | 33  |
| NNU_28000 | 1287 | NNU_004903 | 681  | 0.99 | 104 | 4.44E-47  | 102 |
| NNU_28000 | 1287 | NNU_014389 | 8136 | 0.96 | 171 | 7.13E-75  | 152 |
| NNU_28000 | 1287 | NNU_005761 | 1869 | 0.97 | 128 | 5.67E-56  | 118 |
| NNU_28000 | 1287 | NNU_023515 | 351  | 0.98 | 104 | 2.07E-45  | 99  |
| NNU_28000 | 1287 | NNU_020709 | 1813 | 0.94 | 106 | 2.69E-39  | 88  |
| NNU_28000 | 1287 | NNU_026156 | 834  | 0.96 | 76  | 3.53E-28  | 68  |
| NNU_28000 | 1287 | NNU_020268 | 1368 | 0.96 | 74  | 4.57E-27  | 66  |
| NNU_28000 | 1287 | NNU_009885 | 747  | 0.95 | 61  | 7.70E-20  | 53  |
| NNU_28000 | 1287 | NNU_013956 | 2400 | 0.98 | 46  | 7.76E-15  | 44  |

|           |      |            |      |      |      |           |     |
|-----------|------|------------|------|------|------|-----------|-----|
| NNU_28005 | 849  | NNU_013915 | 912  | 0.93 | 183  | 7.79E-73  | 148 |
| NNU_28005 | 849  | NNU_013911 | 1175 | 0.96 | 162  | 1.69E-69  | 142 |
| NNU_28006 | 2227 | NNU_000013 | 1668 | 0.94 | 483  | 0         | 391 |
| NNU_28006 | 2227 | NNU_011224 | 1452 | 0.93 | 101  | 3.66E-35  | 81  |
| NNU_28009 | 885  | NNU_024185 | 522  | 0.97 | 257  | 2.12E-118 | 230 |
| NNU_28012 | 4740 | NNU_020826 | 1551 | 0.89 | 463  | 1.82E-160 | 307 |
| NNU_28012 | 4740 | NNU_025184 | 609  | 0.93 | 365  | 3.09E-148 | 285 |
| NNU_28012 | 4740 | NNU_009405 | 772  | 0.87 | 390  | 1.16E-117 | 230 |
| NNU_28012 | 4740 | NNU_023562 | 582  | 0.87 | 429  | 8.84E-129 | 250 |
| NNU_28012 | 4740 | NNU_010526 | 3510 | 0.94 | 226  | 1.20E-92  | 185 |
| NNU_28012 | 4740 | NNU_023613 | 2535 | 0.88 | 260  | 3.39E-83  | 168 |
| NNU_28012 | 4740 | NNU_019873 | 1204 | 0.88 | 152  | 7.71E-45  | 99  |
| NNU_28012 | 4740 | NNU_023222 | 1590 | 0.85 | 163  | 1.00E-38  | 88  |
| NNU_28012 | 4740 | NNU_017130 | 705  | 1.00 | 39   | 4.84E-12  | 40  |
| NNU_28015 | 2192 | NNU_017850 | 1275 | 0.84 | 1166 | 0         | 592 |
| NNU_28015 | 2192 | NNU_024338 | 2566 | 0.81 | 112  | 1.72E-13  | 42  |
| NNU_28015 | 2192 | NNU_015810 | 2059 | 0.97 | 38   | 3.73E-10  | 36  |
| NNU_28016 | 1590 | NNU_018901 | 675  | 0.90 | 395  | 4.81E-142 | 273 |
| NNU_28017 | 818  | NNU_006542 | 9798 | 0.90 | 180  | 1.27E-60  | 126 |
| NNU_28017 | 818  | NNU_008586 | 711  | 0.90 | 159  | 2.77E-52  | 111 |
| NNU_28017 | 818  | NNU_004532 | 612  | 0.90 | 121  | 7.88E-38  | 85  |
| NNU_28017 | 818  | NNU_015654 | 3309 | 0.94 | 59   | 8.10E-18  | 49  |
| NNU_28017 | 818  | NNU_025024 | 631  | 0.97 | 37   | 4.91E-10  | 35  |
| NNU_28026 | 763  | NNU_004905 | 888  | 0.90 | 95   | 2.67E-27  | 66  |
| NNU_28027 | 1254 | NNU_003058 | 3282 | 0.96 | 208  | 3.14E-93  | 185 |
| NNU_28027 | 1254 | NNU_004143 | 3876 | 0.84 | 136  | 7.40E-30  | 71  |
| NNU_28027 | 1254 | NNU_017408 | 1737 | 0.85 | 119  | 4.45E-27  | 66  |
| NNU_28027 | 1254 | NNU_013225 | 2031 | 1.00 | 28   | 1.65E-06  | 29  |
| NNU_28035 | 1692 | NNU_010668 | 285  | 0.93 | 94   | 2.15E-31  | 74  |
| NNU_28037 | 2756 | NNU_016448 | 285  | 0.98 | 53   | 2.15E-18  | 51  |
| NNU_28037 | 2756 | NNU_009220 | 1218 | 0.85 | 88   | 7.75E-18  | 50  |
| NNU_28041 | 1386 | NNU_023274 | 1008 | 0.90 | 87   | 2.96E-24  | 61  |
| NNU_28042 | 872  | NNU_006458 | 2037 | 0.90 | 146  | 2.98E-47  | 102 |
| NNU_28042 | 872  | NNU_024143 | 1987 | 0.80 | 182  | 5.10E-30  | 71  |
| NNU_28046 | 5625 | NNU_012851 | 1700 | 0.76 | 345  | 1.18E-43  | 97  |
| NNU_28047 | 880  | NNU_014663 | 1895 | 0.83 | 435  | 3.58E-106 | 208 |
| NNU_28048 | 4837 | NNU_026078 | 762  | 0.88 | 91   | 1.35E-22  | 59  |
| NNU_28050 | 839  | NNU_025445 | 624  | 0.93 | 628  | 0         | 486 |
| NNU_28050 | 839  | NNU_025444 | 309  | 0.94 | 308  | 1.53E-129 | 250 |
| NNU_28050 | 839  | NNU_023992 | 306  | 0.95 | 292  | 5.50E-129 | 249 |
| NNU_28050 | 839  | NNU_025443 | 306  | 0.94 | 292  | 5.54E-124 | 240 |
| NNU_28050 | 839  | NNU_025448 | 372  | 0.98 | 171  | 1.64E-79  | 160 |
| NNU_28051 | 2066 | NNU_012761 | 1967 | 0.94 | 69   | 2.07E-22  | 58  |
| NNU_28051 | 2066 | NNU_012760 | 2111 | 0.93 | 70   | 2.67E-21  | 56  |



|           |      |            |      |      |     |           |     |
|-----------|------|------------|------|------|-----|-----------|-----|
| NNU_28051 | 2066 | NNU_010220 | 1947 | 0.97 | 34  | 5.87E-08  | 32  |
| NNU_28054 | 742  | NNU_019571 | 3398 | 0.81 | 500 | 3.88E-105 | 206 |
| NNU_28056 | 935  | NNU_019775 | 2365 | 0.95 | 419 | 0         | 354 |
| NNU_28056 | 935  | NNU_011700 | 1031 | 0.91 | 237 | 8.42E-88  | 175 |
| NNU_28056 | 935  | NNU_011752 | 551  | 0.92 | 124 | 2.49E-43  | 95  |
| NNU_28056 | 935  | NNU_008267 | 1284 | 0.88 | 124 | 2.53E-33  | 77  |
| NNU_28061 | 1599 | NNU_004250 | 3927 | 0.96 | 255 | 3.02E-114 | 223 |
| NNU_28062 | 811  | NNU_007943 | 5273 | 0.94 | 271 | 1.95E-113 | 221 |
| NNU_28062 | 811  | NNU_002634 | 453  | 0.93 | 271 | 4.22E-110 | 215 |
| NNU_28062 | 811  | NNU_025377 | 894  | 0.93 | 124 | 4.63E-45  | 98  |
| NNU_28064 | 2838 | NNU_020144 | 405  | 0.88 | 123 | 6.04E-34  | 79  |
| NNU_28068 | 1408 | NNU_007743 | 1584 | 0.97 | 127 | 8.02E-55  | 116 |
| NNU_28068 | 1408 | NNU_023406 | 769  | 0.88 | 252 | 3.60E-78  | 158 |
| NNU_28068 | 1408 | NNU_012260 | 1158 | 0.89 | 201 | 2.85E-64  | 133 |
| NNU_28069 | 2215 | NNU_013706 | 3309 | 0.93 | 586 | 0         | 455 |
| NNU_28069 | 2215 | NNU_002333 | 1491 | 0.89 | 456 | 5.06E-163 | 311 |
| NNU_28069 | 2215 | NNU_021022 | 1485 | 0.81 | 456 | 2.58E-96  | 191 |
| NNU_28069 | 2215 | NNU_021804 | 1767 | 0.87 | 139 | 7.81E-37  | 84  |
| NNU_28069 | 2215 | NNU_010547 | 6438 | 0.96 | 72  | 1.03E-25  | 64  |
| NNU_28071 | 2738 | NNU_020520 | 3654 | 0.82 | 142 | 5.91E-24  | 61  |
| NNU_28073 | 3624 | NNU_026078 | 762  | 0.88 | 86  | 6.10E-20  | 54  |
| NNU_28075 | 933  | NNU_021310 | 2371 | 0.88 | 128 | 1.51E-35  | 81  |
| NNU_28075 | 933  | NNU_023841 | 1522 | 0.83 | 134 | 3.29E-27  | 66  |
| NNU_28075 | 933  | NNU_003672 | 516  | 0.89 | 95  | 4.26E-26  | 64  |
| NNU_28081 | 2885 | NNU_007732 | 4012 | 0.90 | 274 | 7.25E-98  | 194 |
| NNU_28081 | 2885 | NNU_019632 | 501  | 0.94 | 144 | 1.28E-55  | 118 |
| NNU_28081 | 2885 | NNU_022071 | 1878 | 0.92 | 106 | 1.71E-34  | 80  |
| NNU_28081 | 2885 | NNU_017147 | 2032 | 0.95 | 79  | 2.88E-27  | 67  |
| NNU_28081 | 2885 | NNU_022433 | 1819 | 0.93 | 70  | 3.75E-21  | 56  |
| NNU_28081 | 2885 | NNU_022055 | 324  | 0.96 | 56  | 2.26E-18  | 51  |
| NNU_28081 | 2885 | NNU_010316 | 2507 | 0.85 | 84  | 4.88E-15  | 45  |
| NNU_28081 | 2885 | NNU_011193 | 1926 | 0.97 | 36  | 6.36E-09  | 34  |
| NNU_28084 | 4137 | NNU_025600 | 3060 | 0.73 | 936 | 1.38E-81  | 165 |
| NNU_28085 | 615  | NNU_015767 | 492  | 0.92 | 95  | 2.75E-31  | 73  |
| NNU_28085 | 615  | NNU_004531 | 810  | 0.90 | 85  | 4.63E-24  | 60  |
| NNU_28088 | 1859 | NNU_010907 | 540  | 0.87 | 294 | 4.68E-93  | 185 |
| NNU_28088 | 1859 | NNU_025759 | 738  | 0.81 | 281 | 3.80E-59  | 124 |
| NNU_28090 | 2848 | NNU_021251 | 2214 | 0.95 | 335 | 3.10E-146 | 281 |
| NNU_28090 | 2848 | NNU_023931 | 3240 | 1.00 | 33  | 6.28E-09  | 34  |
| NNU_28090 | 2848 | NNU_011227 | 488  | 0.97 | 214 | 7.15E-98  | 194 |
| NNU_28090 | 2848 | NNU_011226 | 2535 | 0.95 | 94  | 1.69E-34  | 80  |
| NNU_28090 | 2848 | NNU_007456 | 3350 | 0.90 | 159 | 7.62E-53  | 113 |
| NNU_28091 | 2512 | NNU_008009 | 1538 | 0.93 | 645 | 0         | 503 |
| NNU_28091 | 2512 | NNU_007143 | 428  | 0.89 | 388 | 1.30E-129 | 251 |

|           |      |            |      |      |      |           |     |
|-----------|------|------------|------|------|------|-----------|-----|
| NNU_28091 | 2512 | NNU_013013 | 1606 | 0.80 | 641  | 1.68E-128 | 249 |
| NNU_28091 | 2512 | NNU_016581 | 2166 | 0.92 | 262  | 3.77E-100 | 198 |
| NNU_28091 | 2512 | NNU_000248 | 1086 | 0.91 | 170  | 1.85E-58  | 123 |
| NNU_28096 | 2007 | NNU_002301 | 2170 | 0.84 | 298  | 3.11E-75  | 153 |
| NNU_28096 | 2007 | NNU_002357 | 3025 | 0.95 | 458  | 0         | 398 |
| NNU_28096 | 2007 | NNU_001398 | 696  | 0.96 | 129  | 4.14E-54  | 115 |
| NNU_28096 | 2007 | NNU_010719 | 967  | 0.93 | 182  | 6.73E-72  | 147 |
| NNU_28096 | 2007 | NNU_016111 | 568  | 0.95 | 130  | 2.49E-51  | 110 |
| NNU_28096 | 2007 | NNU_012743 | 222  | 0.89 | 158  | 1.16E-49  | 107 |
| NNU_28096 | 2007 | NNU_002303 | 1584 | 0.94 | 124  | 5.39E-48  | 104 |
| NNU_28096 | 2007 | NNU_011620 | 2976 | 0.74 | 486  | 6.97E-47  | 102 |
| NNU_28098 | 884  | NNU_009714 | 345  | 0.92 | 153  | 1.80E-54  | 115 |
| NNU_28098 | 884  | NNU_011739 | 192  | 0.90 | 144  | 8.41E-48  | 103 |
| NNU_28100 | 3990 | NNU_000967 | 5446 | 0.83 | 393  | 6.04E-95  | 189 |
| NNU_28100 | 3990 | NNU_006722 | 2107 | 0.84 | 144  | 1.84E-30  | 73  |
| NNU_28100 | 3990 | NNU_004737 | 1642 | 0.90 | 88   | 2.40E-24  | 62  |
| NNU_28100 | 3990 | NNU_004292 | 4400 | 0.84 | 84   | 8.75E-14  | 43  |
| NNU_28102 | 3974 | NNU_024473 | 866  | 0.95 | 142  | 1.06E-57  | 122 |
| NNU_28108 | 938  | NNU_010229 | 271  | 0.98 | 171  | 1.84E-79  | 160 |
| NNU_28108 | 938  | NNU_011446 | 1556 | 0.93 | 199  | 2.38E-78  | 158 |
| NNU_28108 | 938  | NNU_024547 | 800  | 0.97 | 127  | 5.30E-55  | 116 |
| NNU_28111 | 2793 | NNU_021251 | 2214 | 0.95 | 335  | 3.04E-146 | 281 |
| NNU_28111 | 2793 | NNU_011226 | 2535 | 0.95 | 91   | 7.69E-33  | 77  |
| NNU_28111 | 2793 | NNU_007456 | 3350 | 0.90 | 159  | 7.47E-53  | 113 |
| NNU_28111 | 2793 | NNU_023931 | 3240 | 1.00 | 33   | 6.16E-09  | 34  |
| NNU_28111 | 2793 | NNU_011227 | 488  | 0.95 | 91   | 7.69E-33  | 77  |
| NNU_28113 | 3589 | NNU_017785 | 5079 | 1.00 | 37   | 4.73E-11  | 38  |
| NNU_28115 | 2324 | NNU_007818 | 2578 | 0.87 | 87   | 5.04E-19  | 52  |
| NNU_28117 | 194  | NNU_002388 | 2638 | 0.93 | 41   | 1.37E-09  | 33  |
| NNU_28122 | 725  | NNU_025468 | 582  | 0.96 | 241  | 1.75E-108 | 212 |
| NNU_28127 | 4519 | NNU_025692 | 959  | 0.86 | 206  | 5.60E-56  | 119 |
| NNU_28127 | 4519 | NNU_025693 | 629  | 0.88 | 120  | 1.25E-32  | 77  |
| NNU_28130 | 601  | NNU_018887 | 645  | 0.83 | 520  | 6.51E-127 | 245 |
| NNU_28131 | 1192 | NNU_022416 | 381  | 0.92 | 218  | 3.02E-83  | 167 |
| NNU_28131 | 1192 | NNU_011765 | 489  | 0.94 | 110  | 6.93E-40  | 89  |
| NNU_28131 | 1192 | NNU_005681 | 1575 | 0.97 | 33   | 1.21E-07  | 31  |
| NNU_28133 | 2385 | NNU_025754 | 2512 | 0.84 | 1006 | 0         | 529 |
| NNU_28133 | 2385 | NNU_003938 | 1461 | 0.83 | 366  | 1.31E-84  | 170 |
| NNU_28133 | 2385 | NNU_003632 | 1976 | 0.84 | 116  | 1.85E-23  | 60  |
| NNU_28137 | 2269 | NNU_008151 | 408  | 0.86 | 406  | 4.24E-124 | 241 |
| NNU_28137 | 2269 | NNU_007637 | 1155 | 0.88 | 150  | 4.75E-44  | 97  |
| NNU_28138 | 2020 | NNU_009276 | 2774 | 0.93 | 552  | 0         | 422 |
| NNU_28139 | 915  | NNU_022627 | 857  | 0.89 | 71   | 3.27E-17  | 48  |
| NNU_28142 | 2521 | NNU_012577 | 1437 | 0.91 | 67   | 7.08E-18  | 50  |

|           |      |            |      |      |      |           |     |
|-----------|------|------------|------|------|------|-----------|-----|
| NNU_28144 | 1701 | NNU_012560 | 483  | 0.77 | 459  | 3.45E-64  | 133 |
| NNU_28145 | 518  | NNU_008051 | 3098 | 0.91 | 86   | 8.33E-26  | 63  |
| NNU_28145 | 518  | NNU_023559 | 1557 | 0.86 | 101  | 1.39E-23  | 59  |
| NNU_28148 | 4026 | NNU_015695 | 606  | 0.91 | 120  | 8.52E-39  | 88  |
| NNU_28154 | 1788 | NNU_002032 | 1457 | 0.89 | 575  | 0         | 382 |
| NNU_28154 | 1788 | NNU_020669 | 420  | 0.90 | 370  | 1.96E-136 | 263 |
| NNU_28154 | 1788 | NNU_013949 | 2878 | 0.92 | 294  | 3.38E-114 | 223 |
| NNU_28154 | 1788 | NNU_023037 | 570  | 0.90 | 290  | 2.65E-105 | 207 |
| NNU_28154 | 1788 | NNU_009278 | 573  | 0.89 | 273  | 1.62E-92  | 184 |
| NNU_28154 | 1788 | NNU_025174 | 1496 | 0.94 | 87   | 8.19E-31  | 73  |
| NNU_28155 | 1143 | NNU_016509 | 1670 | 0.87 | 301  | 6.14E-95  | 188 |
| NNU_28155 | 1143 | NNU_022866 | 1822 | 0.91 | 125  | 5.13E-41  | 91  |
| NNU_28158 | 1790 | NNU_007881 | 1192 | 0.90 | 800  | 0         | 561 |
| NNU_28161 | 258  | NNU_025710 | 3204 | 0.92 | 219  | 1.31E-85  | 170 |
| NNU_28161 | 258  | NNU_021271 | 1723 | 0.90 | 219  | 2.86E-77  | 155 |
| NNU_28161 | 258  | NNU_021256 | 1536 | 0.87 | 219  | 2.90E-67  | 137 |
| NNU_28163 | 1228 | NNU_011501 | 6083 | 0.95 | 130  | 4.21E-52  | 111 |
| NNU_28165 | 3565 | NNU_009814 | 1262 | 0.89 | 75   | 7.76E-19  | 52  |
| NNU_28166 | 3623 | NNU_022017 | 3736 | 0.81 | 1263 | 0         | 533 |
| NNU_28168 | 433  | NNU_011558 | 985  | 0.98 | 94   | 2.43E-40  | 89  |
| NNU_28170 | 2810 | NNU_002301 | 2170 | 0.90 | 546  | 0         | 381 |
| NNU_28170 | 2810 | NNU_010719 | 967  | 0.89 | 457  | 2.99E-161 | 308 |
| NNU_28170 | 2810 | NNU_001395 | 1147 | 0.88 | 457  | 3.02E-156 | 299 |
| NNU_28170 | 2810 | NNU_016111 | 568  | 0.89 | 177  | 2.69E-57  | 121 |
| NNU_28170 | 2810 | NNU_012743 | 222  | 0.88 | 163  | 5.85E-49  | 106 |
| NNU_28170 | 2810 | NNU_002303 | 1584 | 0.90 | 123  | 5.94E-39  | 88  |
| NNU_28170 | 2810 | NNU_014091 | 2319 | 0.83 | 73   | 4.79E-10  | 36  |
| NNU_28170 | 2810 | NNU_014090 | 4357 | 0.83 | 73   | 4.79E-10  | 36  |
| NNU_28171 | 1512 | NNU_002357 | 3025 | 0.95 | 455  | 0         | 384 |
| NNU_28171 | 1512 | NNU_001395 | 1147 | 0.95 | 58   | 4.22E-18  | 50  |
| NNU_28174 | 1071 | NNU_001928 | 3259 | 0.92 | 258  | 7.38E-99  | 195 |
| NNU_28176 | 766  | NNU_012589 | 1763 | 0.97 | 34   | 2.13E-08  | 32  |
| NNU_28178 | 755  | NNU_007001 | 2352 | 0.82 | 443  | 1.11E-100 | 198 |
| NNU_28180 | 2062 | NNU_015858 | 2227 | 0.95 | 489  | 0         | 412 |
| NNU_28180 | 2062 | NNU_001142 | 2459 | 0.97 | 274  | 4.95E-128 | 248 |
| NNU_28180 | 2062 | NNU_014002 | 1506 | 0.97 | 38   | 3.50E-10  | 36  |
| NNU_28181 | 4408 | NNU_014619 | 558  | 0.97 | 32   | 1.63E-06  | 30  |
| NNU_28181 | 4408 | NNU_001444 | 744  | 0.95 | 146  | 3.26E-58  | 123 |
| NNU_28181 | 4408 | NNU_021045 | 297  | 0.98 | 46   | 2.69E-14  | 44  |
| NNU_28181 | 4408 | NNU_004544 | 413  | 0.92 | 211  | 5.27E-81  | 164 |
| NNU_28181 | 4408 | NNU_018119 | 422  | 1.00 | 30   | 4.53E-07  | 31  |
| NNU_28181 | 4408 | NNU_021363 | 282  | 0.95 | 75   | 2.05E-25  | 64  |
| NNU_28181 | 4408 | NNU_010144 | 437  | 0.87 | 251  | 5.31E-76  | 155 |
| NNU_28181 | 4408 | NNU_021126 | 758  | 0.91 | 212  | 6.87E-75  | 153 |

|           |      |            |      |      |     |           |     |
|-----------|------|------------|------|------|-----|-----------|-----|
| NNU_28181 | 4408 | NNU_018454 | 774  | 0.84 | 290 | 8.89E-74  | 151 |
| NNU_28181 | 4408 | NNU_009701 | 318  | 0.83 | 87  | 3.48E-13  | 42  |
| NNU_28181 | 4408 | NNU_017240 | 300  | 0.96 | 79  | 2.63E-29  | 71  |
| NNU_28181 | 4408 | NNU_007191 | 336  | 0.88 | 218 | 1.16E-67  | 140 |
| NNU_28181 | 4408 | NNU_018474 | 305  | 0.94 | 171 | 4.16E-67  | 139 |
| NNU_28181 | 4408 | NNU_005319 | 467  | 0.91 | 151 | 1.18E-52  | 113 |
| NNU_28181 | 4408 | NNU_018147 | 318  | 0.87 | 225 | 5.39E-66  | 137 |
| NNU_28181 | 4408 | NNU_003286 | 414  | 0.92 | 171 | 9.01E-64  | 133 |
| NNU_28181 | 4408 | NNU_016434 | 301  | 0.92 | 165 | 1.95E-60  | 127 |
| NNU_28181 | 4408 | NNU_017939 | 301  | 0.87 | 210 | 2.52E-59  | 125 |
| NNU_28181 | 4408 | NNU_000606 | 414  | 1.00 | 30  | 4.53E-07  | 31  |
| NNU_28181 | 4408 | NNU_012332 | 615  | 0.84 | 157 | 3.38E-33  | 78  |
| NNU_28181 | 4408 | NNU_023807 | 374  | 0.85 | 214 | 5.50E-51  | 110 |
| NNU_28181 | 4408 | NNU_019355 | 1881 | 0.88 | 164 | 3.31E-48  | 105 |
| NNU_28181 | 4408 | NNU_019020 | 344  | 0.93 | 44  | 7.53E-10  | 36  |
| NNU_28181 | 4408 | NNU_004540 | 309  | 0.91 | 146 | 4.28E-47  | 103 |
| NNU_28181 | 4408 | NNU_022647 | 499  | 0.92 | 134 | 4.28E-47  | 103 |
| NNU_28181 | 4408 | NNU_018925 | 283  | 0.90 | 134 | 3.33E-43  | 96  |
| NNU_28181 | 4408 | NNU_026495 | 467  | 0.93 | 83  | 1.58E-26  | 66  |
| NNU_28181 | 4408 | NNU_017098 | 386  | 0.89 | 137 | 5.58E-41  | 92  |
| NNU_28181 | 4408 | NNU_015186 | 287  | 0.88 | 134 | 1.21E-37  | 86  |
| NNU_28181 | 4408 | NNU_025460 | 279  | 0.87 | 142 | 1.21E-37  | 86  |
| NNU_28181 | 4408 | NNU_018992 | 459  | 0.88 | 129 | 7.27E-35  | 81  |
| NNU_28181 | 4408 | NNU_018477 | 960  | 0.92 | 100 | 1.22E-32  | 77  |
| NNU_28181 | 4408 | NNU_016727 | 410  | 0.78 | 101 | 4.53E-07  | 31  |
| NNU_28181 | 4408 | NNU_001633 | 924  | 0.86 | 112 | 2.05E-25  | 64  |
| NNU_28181 | 4408 | NNU_015825 | 482  | 0.87 | 94  | 1.23E-22  | 59  |
| NNU_28181 | 4408 | NNU_023930 | 743  | 0.86 | 101 | 1.23E-22  | 59  |
| NNU_28181 | 4408 | NNU_018463 | 180  | 0.85 | 104 | 4.44E-22  | 58  |
| NNU_28181 | 4408 | NNU_021315 | 669  | 0.96 | 51  | 2.08E-15  | 46  |
| NNU_28181 | 4408 | NNU_016433 | 405  | 0.96 | 50  | 7.48E-15  | 45  |
| NNU_28181 | 4408 | NNU_019582 | 441  | 0.98 | 44  | 3.48E-13  | 42  |
| NNU_28181 | 4408 | NNU_017938 | 277  | 0.90 | 57  | 4.50E-12  | 40  |
| NNU_28181 | 4408 | NNU_007518 | 391  | 1.00 | 29  | 1.63E-06  | 30  |
| NNU_28182 | 516  | NNU_024350 | 645  | 0.93 | 118 | 1.35E-43  | 95  |
| NNU_28184 | 2093 | NNU_014577 | 3299 | 0.92 | 69  | 1.63E-18  | 51  |
| NNU_28186 | 1299 | NNU_001740 | 614  | 0.84 | 350 | 4.21E-92  | 183 |
| NNU_28187 | 499  | NNU_020801 | 886  | 0.86 | 317 | 3.38E-94  | 186 |
| NNU_28187 | 499  | NNU_020197 | 867  | 0.87 | 302 | 3.38E-94  | 186 |
| NNU_28188 | 1579 | NNU_001348 | 1875 | 0.96 | 296 | 2.24E-135 | 261 |
| NNU_28188 | 1579 | NNU_001358 | 1302 | 0.96 | 433 | 0         | 386 |
| NNU_28189 | 842  | NNU_001348 | 1875 | 1.00 | 83  | 2.92E-37  | 84  |
| NNU_28189 | 842  | NNU_001358 | 1302 | 1.00 | 79  | 4.88E-35  | 80  |
| NNU_28189 | 842  | NNU_001357 | 351  | 0.95 | 40  | 5.06E-10  | 35  |

|           |      |            |      |      |     |           |     |
|-----------|------|------------|------|------|-----|-----------|-----|
| NNU_28191 | 853  | NNU_010721 | 706  | 0.98 | 90  | 8.22E-38  | 85  |
| NNU_28192 | 3077 | NNU_000581 | 2976 | 0.84 | 403 | 1.64E-109 | 215 |
| NNU_28195 | 1705 | NNU_008916 | 895  | 0.94 | 93  | 6.04E-32  | 75  |
| NNU_28195 | 1705 | NNU_012589 | 1763 | 0.97 | 34  | 4.83E-08  | 32  |
| NNU_28198 | 4299 | NNU_007097 | 1101 | 0.98 | 50  | 1.57E-16  | 48  |
| NNU_28199 | 906  | NNU_007082 | 3790 | 0.92 | 156 | 8.50E-58  | 121 |
| NNU_28200 | 2601 | NNU_007078 | 783  | 0.92 | 61  | 3.40E-16  | 47  |
| NNU_28201 | 820  | NNU_001548 | 1137 | 1.00 | 91  | 1.01E-41  | 92  |
| NNU_28208 | 2784 | NNU_014303 | 2672 | 0.94 | 47  | 1.02E-11  | 39  |
| NNU_28212 | 3086 | NNU_023985 | 2509 | 0.95 | 150 | 1.36E-60  | 127 |
| NNU_28212 | 3086 | NNU_016314 | 519  | 0.93 | 122 | 5.01E-45  | 99  |
| NNU_28212 | 3086 | NNU_010154 | 4600 | 0.89 | 128 | 3.93E-36  | 83  |
| NNU_28215 | 748  | NNU_007969 | 266  | 0.93 | 54  | 1.60E-14  | 43  |
| NNU_28218 | 1883 | NNU_019470 | 6016 | 0.80 | 280 | 3.88E-54  | 115 |
| NNU_28218 | 1883 | NNU_020149 | 2414 | 0.79 | 179 | 2.42E-26  | 65  |
| NNU_28219 | 763  | NNU_003545 | 1059 | 0.91 | 408 | 2.22E-157 | 300 |
| NNU_28220 | 1794 | NNU_000448 | 806  | 0.89 | 147 | 1.35E-43  | 96  |
| NNU_28223 | 8451 | NNU_019536 | 2530 | 0.94 | 204 | 7.83E-82  | 166 |
| NNU_28223 | 8451 | NNU_019537 | 625  | 0.97 | 108 | 3.83E-45  | 100 |
| NNU_28223 | 8451 | NNU_005823 | 4719 | 0.86 | 176 | 2.96E-46  | 102 |
| NNU_28224 | 947  | NNU_026248 | 606  | 0.84 | 172 | 2.55E-38  | 86  |
| NNU_28227 | 1276 | NNU_021293 | 1422 | 0.89 | 130 | 7.42E-40  | 89  |
| NNU_28227 | 1276 | NNU_009102 | 507  | 0.90 | 88  | 2.11E-25  | 63  |
| NNU_28231 | 989  | NNU_002195 | 740  | 0.95 | 289 | 5.07E-125 | 242 |
| NNU_28231 | 989  | NNU_006673 | 912  | 0.96 | 79  | 5.80E-30  | 71  |
| NNU_28232 | 2189 | NNU_013333 | 4081 | 0.89 | 109 | 2.80E-31  | 74  |
| NNU_28236 | 894  | NNU_001672 | 1422 | 0.89 | 220 | 1.06E-71  | 146 |
| NNU_28237 | 2364 | NNU_025560 | 1677 | 1.00 | 75  | 2.34E-32  | 76  |
| NNU_28238 | 992  | NNU_011756 | 518  | 0.83 | 166 | 5.78E-35  | 80  |
| NNU_28240 | 1258 | NNU_016696 | 2793 | 0.95 | 467 | 0         | 398 |
| NNU_28244 | 1171 | NNU_021089 | 1348 | 0.96 | 512 | 0         | 455 |
| NNU_28244 | 1171 | NNU_022786 | 1350 | 0.92 | 128 | 1.88E-45  | 99  |
| NNU_28244 | 1171 | NNU_011377 | 1803 | 0.97 | 78  | 5.33E-31  | 73  |
| NNU_28244 | 1171 | NNU_015876 | 3162 | 0.96 | 78  | 2.48E-29  | 70  |
| NNU_28248 | 349  | NNU_023677 | 1617 | 0.86 | 199 | 2.44E-54  | 114 |
| NNU_28253 | 416  | NNU_015379 | 2005 | 0.98 | 42  | 4.04E-13  | 40  |
| NNU_28253 | 416  | NNU_009912 | 270  | 0.92 | 83  | 6.61E-26  | 63  |
| NNU_28253 | 416  | NNU_019615 | 2404 | 0.93 | 66  | 8.61E-20  | 52  |
| NNU_28253 | 416  | NNU_022191 | 213  | 0.94 | 48  | 4.04E-13  | 40  |
| NNU_28256 | 902  | NNU_012878 | 657  | 0.92 | 578 | 0         | 427 |
| NNU_28256 | 902  | NNU_007900 | 979  | 0.93 | 341 | 2.70E-142 | 273 |
| NNU_28256 | 902  | NNU_012877 | 219  | 0.98 | 51  | 8.96E-18  | 49  |
| NNU_28259 | 7902 | NNU_018289 | 735  | 0.88 | 142 | 1.30E-39  | 90  |
| NNU_28259 | 7902 | NNU_002414 | 2537 | 0.90 | 90  | 3.68E-25  | 64  |

|           |      |            |       |      |      |           |      |
|-----------|------|------------|-------|------|------|-----------|------|
| NNU_28259 | 7902 | NNU_008019 | 3229  | 0.81 | 147  | 7.97E-22  | 58   |
| NNU_28259 | 7902 | NNU_026405 | 1252  | 1.00 | 36   | 3.76E-10  | 37   |
| NNU_28261 | 541  | NNU_018278 | 1653  | 0.98 | 56   | 8.78E-21  | 54   |
| NNU_28262 | 4351 | NNU_022030 | 762   | 0.93 | 71   | 1.58E-21  | 57   |
| NNU_28262 | 4351 | NNU_021513 | 600   | 0.92 | 65   | 3.41E-18  | 51   |
| NNU_28266 | 5724 | NNU_000255 | 1650  | 0.88 | 83   | 3.47E-19  | 53   |
| NNU_28266 | 5724 | NNU_007381 | 1297  | 0.84 | 100  | 4.49E-18  | 51   |
| NNU_28266 | 5724 | NNU_012705 | 3171  | 0.95 | 58   | 1.62E-17  | 50   |
| NNU_28266 | 5724 | NNU_004409 | 1540  | 0.87 | 88   | 5.81E-17  | 49   |
| NNU_28266 | 5724 | NNU_019035 | 2257  | 1.00 | 37   | 7.57E-11  | 38   |
| NNU_28266 | 5724 | NNU_004207 | 865   | 0.93 | 41   | 4.56E-08  | 33   |
| NNU_28270 | 3318 | NNU_009850 | 1861  | 1.00 | 32   | 2.63E-08  | 33   |
| NNU_28275 | 1254 | NNU_006940 | 4006  | 0.78 | 511  | 1.49E-76  | 155  |
| NNU_28275 | 1254 | NNU_001260 | 1102  | 1.00 | 33   | 2.74E-09  | 34   |
| NNU_28276 | 1646 | NNU_005533 | 3858  | 0.95 | 159  | 7.17E-66  | 136  |
| NNU_28277 | 868  | NNU_005748 | 1009  | 0.97 | 127  | 4.90E-55  | 116  |
| NNU_28280 | 3102 | NNU_002727 | 2707  | 0.96 | 70   | 1.86E-24  | 62   |
| NNU_28280 | 3102 | NNU_001988 | 853   | 0.87 | 208  | 8.19E-63  | 131  |
| NNU_28283 | 757  | NNU_003487 | 1908  | 0.85 | 285  | 8.95E-72  | 146  |
| NNU_28283 | 757  | NNU_011453 | 846   | 0.84 | 122  | 2.65E-27  | 66   |
| NNU_28284 | 2163 | NNU_011378 | 1380  | 0.92 | 1354 | 0         | 1045 |
| NNU_28284 | 2163 | NNU_000536 | 483   | 0.91 | 472  | 0         | 350  |
| NNU_28285 | 3730 | NNU_011381 | 381   | 0.88 | 319  | 2.59E-103 | 204  |
| NNU_28285 | 3730 | NNU_006709 | 3256  | 0.90 | 131  | 1.70E-40  | 91   |
| NNU_28285 | 3730 | NNU_024899 | 3722  | 0.93 | 67   | 2.26E-19  | 53   |
| NNU_28286 | 3190 | NNU_011393 | 4349  | 0.96 | 484  | 0         | 424  |
| NNU_28287 | 7026 | NNU_004737 | 1642  | 0.88 | 88   | 9.17E-21  | 56   |
| NNU_28292 | 1850 | NNU_020118 | 3498  | 0.89 | 86   | 6.65E-22  | 57   |
| NNU_28294 | 169  | NNU_026065 | 899   | 0.88 | 136  | 4.04E-39  | 86   |
| NNU_28309 | 3239 | NNU_019568 | 10194 | 0.81 | 631  | 2.77E-137 | 265  |
| NNU_28315 | 1247 | NNU_007902 | 1695  | 0.96 | 97   | 1.21E-37  | 85   |
| NNU_28315 | 1247 | NNU_025173 | 3253  | 0.93 | 90   | 5.69E-31  | 73   |
| NNU_28315 | 1247 | NNU_020668 | 4831  | 0.83 | 107  | 1.25E-17  | 49   |
| NNU_28315 | 1247 | NNU_006219 | 2926  | 0.96 | 44   | 4.52E-12  | 39   |
| NNU_28317 | 2819 | NNU_022004 | 2094  | 0.90 | 99   | 2.17E-28  | 69   |
| NNU_28325 | 4252 | NNU_018016 | 1017  | 0.93 | 215  | 2.35E-84  | 170  |
| NNU_28329 | 901  | NNU_000416 | 3802  | 0.91 | 284  | 2.19E-108 | 212  |
| NNU_28338 | 1516 | NNU_016611 | 2724  | 0.91 | 96   | 3.22E-29  | 70   |
| NNU_28339 | 934  | NNU_020284 | 291   | 0.88 | 136  | 1.50E-40  | 90   |
| NNU_28339 | 934  | NNU_014409 | 291   | 0.88 | 136  | 2.51E-38  | 86   |
| NNU_28339 | 934  | NNU_004564 | 189   | 0.90 | 110  | 2.53E-33  | 77   |
| NNU_28346 | 930  | NNU_017731 | 1042  | 0.83 | 307  | 5.11E-75  | 152  |
| NNU_28346 | 930  | NNU_017733 | 1061  | 0.86 | 188  | 1.14E-51  | 110  |
| NNU_28346 | 930  | NNU_026580 | 243   | 0.99 | 78   | 9.05E-33  | 76   |

|           |       |            |      |      |      |           |     |
|-----------|-------|------------|------|------|------|-----------|-----|
| NNU_28348 | 1305  | NNU_005722 | 2399 | 0.96 | 626  | 0         | 552 |
| NNU_28348 | 1305  | NNU_005592 | 1156 | 0.97 | 67   | 7.76E-25  | 62  |
| NNU_28349 | 646   | NNU_009567 | 1884 | 0.99 | 108  | 1.31E-49  | 106 |
| NNU_28349 | 646   | NNU_007775 | 3381 | 0.96 | 72   | 2.91E-26  | 64  |
| NNU_28349 | 646   | NNU_003501 | 2994 | 0.98 | 43   | 1.78E-13  | 41  |
| NNU_28349 | 646   | NNU_005963 | 2744 | 0.95 | 43   | 8.26E-12  | 38  |
| NNU_28350 | 1899  | NNU_008440 | 3497 | 0.89 | 119  | 5.20E-33  | 77  |
| NNU_28350 | 1899  | NNU_004498 | 794  | 0.88 | 111  | 1.13E-29  | 71  |
| NNU_28350 | 1899  | NNU_005032 | 3027 | 0.86 | 105  | 1.47E-23  | 60  |
| NNU_28353 | 2245  | NNU_023606 | 1245 | 0.84 | 230  | 9.96E-56  | 118 |
| NNU_28354 | 1240  | NNU_012449 | 2365 | 0.84 | 303  | 1.47E-76  | 155 |
| NNU_28357 | 937   | NNU_019486 | 779  | 0.89 | 124  | 1.17E-36  | 83  |
| NNU_28357 | 937   | NNU_001141 | 1191 | 0.94 | 63   | 2.00E-19  | 52  |
| NNU_28357 | 937   | NNU_012765 | 3480 | 0.89 | 64   | 5.61E-15  | 44  |
| NNU_28361 | 1456  | NNU_010270 | 502  | 0.90 | 105  | 2.39E-30  | 72  |
| NNU_28361 | 1456  | NNU_008738 | 495  | 0.83 | 119  | 5.21E-22  | 57  |
| NNU_28361 | 1456  | NNU_012888 | 2064 | 0.93 | 45   | 6.84E-11  | 37  |
| NNU_28364 | 2005  | NNU_002773 | 1383 | 0.97 | 191  | 1.41E-88  | 177 |
| NNU_28364 | 2005  | NNU_022786 | 1350 | 0.84 | 149  | 1.53E-33  | 78  |
| NNU_28366 | 756   | NNU_002333 | 1491 | 0.91 | 116  | 5.61E-39  | 87  |
| NNU_28366 | 756   | NNU_021022 | 1485 | 0.88 | 116  | 2.63E-32  | 75  |
| NNU_28371 | 582   | NNU_000763 | 3023 | 0.90 | 560  | 0         | 393 |
| NNU_28371 | 582   | NNU_021051 | 1449 | 0.97 | 30   | 2.69E-06  | 28  |
| NNU_28377 | 3052  | NNU_012433 | 2810 | 0.98 | 41   | 1.12E-11  | 39  |
| NNU_28377 | 3052  | NNU_010334 | 3857 | 0.93 | 39   | 3.13E-07  | 31  |
| NNU_28380 | 1740  | NNU_004125 | 1905 | 0.81 | 1002 | 0         | 422 |
| NNU_28380 | 1740  | NNU_025547 | 831  | 0.94 | 376  | 1.11E-158 | 303 |
| NNU_28380 | 1740  | NNU_002001 | 618  | 0.85 | 440  | 7.02E-121 | 235 |
| NNU_28380 | 1740  | NNU_013784 | 600  | 0.95 | 215  | 4.38E-93  | 185 |
| NNU_28380 | 1740  | NNU_023177 | 1257 | 0.91 | 142  | 1.68E-47  | 103 |
| NNU_28382 | 9652  | NNU_009876 | 669  | 0.82 | 375  | 8.95E-82  | 166 |
| NNU_28382 | 9652  | NNU_003878 | 4985 | 0.86 | 119  | 3.48E-26  | 66  |
| NNU_28389 | 3035  | NNU_003361 | 1587 | 0.91 | 363  | 2.59E-137 | 265 |
| NNU_28389 | 3035  | NNU_001291 | 1866 | 0.87 | 103  | 6.56E-24  | 61  |
| NNU_28389 | 3035  | NNU_008902 | 1689 | 0.86 | 139  | 1.39E-35  | 82  |
| NNU_28389 | 3035  | NNU_007415 | 837  | 0.89 | 230  | 3.65E-76  | 155 |
| NNU_28389 | 3035  | NNU_022459 | 1113 | 0.90 | 116  | 1.80E-34  | 80  |
| NNU_28389 | 3035  | NNU_003871 | 297  | 0.98 | 49   | 3.97E-16  | 47  |
| NNU_28394 | 10759 | NNU_024722 | 644  | 0.89 | 508  | 0         | 347 |
| NNU_28394 | 10759 | NNU_026321 | 2270 | 0.90 | 244  | 1.28E-85  | 173 |
| NNU_28394 | 10759 | NNU_013276 | 2499 | 0.84 | 277  | 6.09E-69  | 143 |
| NNU_28394 | 10759 | NNU_002318 | 3126 | 0.85 | 176  | 1.75E-44  | 99  |
| NNU_28394 | 10759 | NNU_002306 | 1530 | 0.84 | 176  | 3.80E-41  | 93  |
| NNU_28394 | 10759 | NNU_015383 | 2314 | 0.79 | 259  | 1.06E-36  | 85  |

|           |       |            |      |      |     |           |     |
|-----------|-------|------------|------|------|-----|-----------|-----|
| NNU_28394 | 10759 | NNU_007381 | 1297 | 0.85 | 153 | 6.40E-34  | 80  |
| NNU_28394 | 10759 | NNU_000671 | 2394 | 0.83 | 129 | 1.80E-24  | 63  |
| NNU_28394 | 10759 | NNU_019144 | 2645 | 0.84 | 112 | 1.09E-21  | 58  |
| NNU_28397 | 1067  | NNU_006690 | 2930 | 0.95 | 470 | 0         | 403 |
| NNU_28397 | 1067  | NNU_022623 | 2679 | 0.85 | 221 | 4.68E-56  | 118 |
| NNU_28397 | 1067  | NNU_022620 | 3298 | 0.77 | 167 | 8.23E-19  | 51  |
| NNU_28399 | 2209  | NNU_015647 | 939  | 0.84 | 956 | 0         | 495 |
| NNU_28399 | 2209  | NNU_004368 | 5914 | 0.93 | 269 | 3.26E-110 | 216 |
| NNU_28399 | 2209  | NNU_013312 | 857  | 0.92 | 220 | 5.65E-83  | 167 |
| NNU_28401 | 2111  | NNU_014063 | 843  | 0.90 | 264 | 4.11E-94  | 187 |
| NNU_28401 | 2111  | NNU_000652 | 471  | 0.92 | 132 | 2.04E-47  | 103 |
| NNU_28402 | 716   | NNU_015777 | 1373 | 0.96 | 47  | 5.50E-14  | 42  |
| NNU_28403 | 841   | NNU_008146 | 846  | 0.87 | 188 | 1.72E-49  | 106 |
| NNU_28403 | 841   | NNU_025919 | 2427 | 0.94 | 223 | 7.50E-93  | 184 |
| NNU_28403 | 841   | NNU_009099 | 1218 | 0.93 | 127 | 1.03E-46  | 101 |
| NNU_28404 | 556   | NNU_005791 | 411  | 0.96 | 76  | 1.49E-28  | 68  |
| NNU_28405 | 3682  | NNU_010471 | 499  | 0.84 | 339 | 1.56E-90  | 181 |
| NNU_28405 | 3682  | NNU_014041 | 788  | 0.98 | 39  | 1.75E-10  | 37  |
| NNU_28405 | 3682  | NNU_001397 | 1838 | 0.82 | 329 | 1.25E-66  | 138 |
| NNU_28405 | 3682  | NNU_023930 | 743  | 0.81 | 298 | 1.64E-55  | 118 |
| NNU_28405 | 3682  | NNU_004195 | 3693 | 0.91 | 90  | 3.68E-27  | 67  |
| NNU_28405 | 3682  | NNU_024129 | 1491 | 0.94 | 53  | 6.24E-15  | 45  |
| NNU_28405 | 3682  | NNU_010851 | 1272 | 0.86 | 56  | 2.92E-08  | 33  |
| NNU_28407 | 2521  | NNU_004250 | 3927 | 0.96 | 255 | 2.21E-117 | 229 |
| NNU_28407 | 2521  | NNU_018754 | 5368 | 0.90 | 225 | 8.42E-77  | 156 |
| NNU_28409 | 1997  | NNU_023020 | 2024 | 0.91 | 453 | 3.47E-174 | 331 |
| NNU_28409 | 1997  | NNU_010736 | 2063 | 0.77 | 349 | 8.91E-51  | 109 |
| NNU_28412 | 2938  | NNU_023397 | 1842 | 0.99 | 97  | 7.98E-43  | 95  |
| NNU_28412 | 2938  | NNU_013934 | 2234 | 0.94 | 102 | 2.89E-37  | 85  |
| NNU_28416 | 3294  | NNU_011702 | 1845 | 0.92 | 60  | 1.55E-15  | 46  |
| NNU_28419 | 2439  | NNU_004250 | 3927 | 0.97 | 271 | 2.73E-126 | 245 |
| NNU_28419 | 2439  | NNU_018754 | 5368 | 0.90 | 155 | 3.03E-51  | 110 |
| NNU_28420 | 1451  | NNU_002301 | 2170 | 0.87 | 766 | 0         | 477 |
| NNU_28420 | 1451  | NNU_002303 | 1584 | 0.89 | 285 | 1.31E-92  | 184 |
| NNU_28420 | 1451  | NNU_011620 | 2976 | 0.75 | 470 | 6.40E-56  | 118 |
| NNU_28420 | 1451  | NNU_001398 | 696  | 0.93 | 60  | 5.23E-17  | 48  |
| NNU_28420 | 1451  | NNU_001395 | 1147 | 0.90 | 161 | 3.85E-53  | 113 |
| NNU_28420 | 1451  | NNU_010719 | 967  | 0.89 | 161 | 1.79E-51  | 110 |
| NNU_28420 | 1451  | NNU_012743 | 222  | 0.88 | 158 | 8.39E-45  | 98  |
| NNU_28420 | 1451  | NNU_026274 | 1977 | 0.78 | 258 | 1.41E-37  | 85  |
| NNU_28420 | 1451  | NNU_002302 | 237  | 0.94 | 77  | 2.40E-25  | 63  |
| NNU_28421 | 468   | NNU_005641 | 679  | 0.92 | 105 | 9.55E-35  | 79  |
| NNU_28422 | 4058  | NNU_000465 | 925  | 0.88 | 465 | 9.45E-153 | 293 |
| NNU_28427 | 4253  | NNU_001397 | 1838 | 0.80 | 315 | 1.13E-57  | 122 |



|           |      |            |      |      |     |           |     |
|-----------|------|------------|------|------|-----|-----------|-----|
| NNU_28427 | 4253 | NNU_023248 | 3440 | 0.90 | 149 | 1.15E-47  | 104 |
| NNU_28427 | 4253 | NNU_022014 | 1998 | 0.88 | 149 | 1.16E-42  | 95  |
| NNU_28427 | 4253 | NNU_000195 | 1494 | 1.00 | 28  | 5.66E-06  | 29  |
| NNU_28428 | 899  | NNU_001397 | 1838 | 0.87 | 241 | 8.26E-73  | 148 |
| NNU_28428 | 899  | NNU_010471 | 499  | 0.92 | 48  | 1.16E-11  | 38  |
| NNU_28428 | 899  | NNU_014041 | 788  | 0.97 | 33  | 9.06E-08  | 31  |
| NNU_28429 | 1062 | NNU_005576 | 1991 | 0.91 | 463 | 3.96E-171 | 325 |
| NNU_28429 | 1062 | NNU_009557 | 3129 | 0.87 | 226 | 3.55E-67  | 138 |
| NNU_28437 | 759  | NNU_022262 | 3001 | 0.91 | 218 | 1.48E-79  | 160 |
| NNU_28437 | 759  | NNU_018527 | 480  | 0.92 | 135 | 7.19E-48  | 103 |
| NNU_28437 | 759  | NNU_008638 | 485  | 0.92 | 98  | 2.64E-32  | 75  |
| NNU_28437 | 759  | NNU_012157 | 441  | 0.89 | 100 | 2.06E-28  | 68  |
| NNU_28442 | 5826 | NNU_003217 | 2653 | 0.95 | 77  | 2.10E-26  | 66  |
| NNU_28442 | 5826 | NNU_026673 | 1164 | 0.95 | 196 | 3.22E-84  | 170 |
| NNU_28442 | 5826 | NNU_001964 | 1086 | 0.95 | 72  | 1.26E-23  | 61  |
| NNU_28442 | 5826 | NNU_024084 | 408  | 0.96 | 65  | 2.11E-21  | 57  |
| NNU_28442 | 5826 | NNU_015449 | 546  | 0.92 | 71  | 9.83E-20  | 54  |
| NNU_28442 | 5826 | NNU_015614 | 2541 | 0.98 | 48  | 2.75E-15  | 46  |
| NNU_28442 | 5826 | NNU_025749 | 3272 | 0.95 | 40  | 3.59E-09  | 35  |
| NNU_28443 | 819  | NNU_026285 | 2207 | 0.91 | 693 | 0         | 500 |
| NNU_28443 | 819  | NNU_026287 | 1449 | 0.89 | 746 | 0         | 499 |
| NNU_28443 | 819  | NNU_023680 | 1719 | 1.00 | 55  | 1.04E-21  | 56  |
| NNU_28445 | 3172 | NNU_010133 | 3573 | 0.87 | 527 | 1.56E-164 | 314 |
| NNU_28445 | 3172 | NNU_009171 | 3678 | 0.80 | 456 | 2.26E-83  | 168 |
| NNU_28445 | 3172 | NNU_001346 | 441  | 0.90 | 220 | 1.06E-76  | 156 |
| NNU_28445 | 3172 | NNU_013984 | 576  | 0.92 | 124 | 8.62E-43  | 95  |
| NNU_28445 | 3172 | NNU_017061 | 3351 | 0.95 | 40  | 1.95E-09  | 35  |
| NNU_28445 | 3172 | NNU_021337 | 3929 | 0.97 | 31  | 4.21E-06  | 29  |
| NNU_28446 | 1233 | NNU_020955 | 1000 | 0.92 | 744 | 0         | 558 |
| NNU_28447 | 7315 | NNU_019395 | 4780 | 0.96 | 89  | 5.63E-33  | 78  |
| NNU_28447 | 7315 | NNU_002814 | 2832 | 0.86 | 130 | 2.02E-32  | 77  |
| NNU_28447 | 7315 | NNU_000105 | 8491 | 0.88 | 95  | 5.71E-23  | 60  |
| NNU_28450 | 7120 | NNU_011023 | 1303 | 0.81 | 148 | 2.00E-22  | 59  |
| NNU_28454 | 4453 | NNU_008441 | 1168 | 0.97 | 99  | 2.03E-40  | 91  |
| NNU_28454 | 4453 | NNU_011232 | 593  | 0.96 | 100 | 2.62E-39  | 89  |
| NNU_28454 | 4453 | NNU_008482 | 462  | 0.96 | 44  | 1.64E-11  | 39  |
| NNU_28454 | 4453 | NNU_003464 | 1536 | 0.86 | 83  | 1.26E-17  | 50  |
| NNU_28454 | 4453 | NNU_019075 | 3355 | 0.91 | 67  | 4.52E-17  | 49  |
| NNU_28454 | 4453 | NNU_016634 | 48   | 0.98 | 47  | 7.56E-15  | 45  |
| NNU_28455 | 3554 | NNU_013385 | 5210 | 0.91 | 100 | 4.56E-31  | 74  |
| NNU_28455 | 3554 | NNU_016012 | 2716 | 0.84 | 200 | 2.67E-48  | 105 |
| NNU_28456 | 1640 | NNU_013369 | 4150 | 0.94 | 338 | 4.93E-147 | 282 |
| NNU_28456 | 1640 | NNU_011118 | 3176 | 0.95 | 41  | 7.72E-11  | 37  |
| NNU_28458 | 6027 | NNU_011691 | 716  | 0.89 | 352 | 4.08E-123 | 240 |

|           |      |            |      |      |      |           |      |
|-----------|------|------------|------|------|------|-----------|------|
| NNU_28458 | 6027 | NNU_016810 | 1833 | 0.91 | 151  | 2.10E-51  | 111  |
| NNU_28458 | 6027 | NNU_015720 | 1528 | 0.92 | 193  | 1.57E-72  | 149  |
| NNU_28458 | 6027 | NNU_000617 | 611  | 0.85 | 191  | 7.59E-46  | 101  |
| NNU_28458 | 6027 | NNU_000616 | 1798 | 0.88 | 153  | 9.82E-45  | 99   |
| NNU_28458 | 6027 | NNU_018096 | 330  | 0.92 | 102  | 1.29E-33  | 79   |
| NNU_28458 | 6027 | NNU_021229 | 863  | 0.93 | 87   | 4.67E-28  | 69   |
| NNU_28458 | 6027 | NNU_018498 | 1528 | 0.93 | 72   | 2.19E-21  | 57   |
| NNU_28459 | 3317 | NNU_000105 | 8491 | 0.97 | 32   | 1.22E-06  | 30   |
| NNU_28459 | 3317 | NNU_026179 | 931  | 0.87 | 168  | 5.38E-45  | 99   |
| NNU_28459 | 3317 | NNU_023123 | 1803 | 0.83 | 171  | 1.17E-36  | 84   |
| NNU_28459 | 3317 | NNU_018179 | 2813 | 0.81 | 151  | 1.54E-25  | 64   |
| NNU_28459 | 3317 | NNU_018192 | 1620 | 0.91 | 85   | 1.99E-24  | 62   |
| NNU_28459 | 3317 | NNU_001712 | 2005 | 0.88 | 80   | 2.59E-18  | 51   |
| NNU_28459 | 3317 | NNU_022853 | 2276 | 0.97 | 31   | 4.40E-06  | 29   |
| NNU_28461 | 1155 | NNU_002499 | 2448 | 0.91 | 207  | 8.26E-74  | 150  |
| NNU_28462 | 5585 | NNU_000455 | 1143 | 0.90 | 458  | 7.62E-170 | 324  |
| NNU_28462 | 5585 | NNU_003153 | 2814 | 0.97 | 265  | 6.28E-126 | 245  |
| NNU_28462 | 5585 | NNU_023878 | 807  | 0.90 | 208  | 2.44E-70  | 145  |
| NNU_28462 | 5585 | NNU_016785 | 1215 | 0.97 | 108  | 2.53E-45  | 100  |
| NNU_28462 | 5585 | NNU_000069 | 897  | 0.86 | 129  | 5.55E-32  | 76   |
| NNU_28462 | 5585 | NNU_013776 | 432  | 0.95 | 60   | 1.22E-18  | 52   |
| NNU_28462 | 5585 | NNU_011994 | 1295 | 0.89 | 69   | 2.64E-15  | 46   |
| NNU_28462 | 5585 | NNU_010747 | 1522 | 0.91 | 63   | 2.64E-15  | 46   |
| NNU_28462 | 5585 | NNU_005327 | 2341 | 1.00 | 28   | 7.44E-06  | 29   |
| NNU_28464 | 1449 | NNU_002566 | 458  | 0.79 | 318  | 1.38E-52  | 112  |
| NNU_28464 | 1449 | NNU_005558 | 2975 | 0.91 | 145  | 1.08E-48  | 105  |
| NNU_28464 | 1449 | NNU_013492 | 2276 | 0.91 | 132  | 1.08E-43  | 96   |
| NNU_28464 | 1449 | NNU_003537 | 1734 | 0.92 | 101  | 3.06E-34  | 79   |
| NNU_28464 | 1449 | NNU_019808 | 1393 | 0.92 | 78   | 3.10E-24  | 61   |
| NNU_28464 | 1449 | NNU_009177 | 924  | 0.88 | 72   | 6.76E-16  | 46   |
| NNU_28464 | 1449 | NNU_012659 | 2863 | 0.92 | 48   | 6.81E-11  | 37   |
| NNU_28464 | 1449 | NNU_015961 | 1861 | 0.95 | 39   | 3.17E-09  | 34   |
| NNU_28464 | 1449 | NNU_008327 | 3038 | 1.00 | 27   | 6.86E-06  | 28   |
| NNU_28468 | 2038 | NNU_001695 | 4395 | 0.96 | 1575 | 0         | 1379 |
| NNU_28470 | 2425 | NNU_000428 | 1323 | 0.86 | 468  | 3.41E-145 | 279  |
| NNU_28472 | 2210 | NNU_021419 | 3880 | 0.92 | 211  | 2.05E-77  | 157  |
| NNU_28472 | 2210 | NNU_000559 | 1791 | 0.91 | 55   | 6.24E-13  | 41   |
| NNU_28472 | 2210 | NNU_013044 | 1126 | 1.00 | 37   | 2.90E-11  | 38   |
| NNU_28472 | 2210 | NNU_001338 | 702  | 0.95 | 40   | 1.35E-09  | 35   |
| NNU_28474 | 2430 | NNU_022765 | 1175 | 0.88 | 274  | 6.18E-88  | 176  |
| NNU_28475 | 880  | NNU_002755 | 2085 | 0.87 | 62   | 5.29E-10  | 35   |
| NNU_28476 | 3710 | NNU_014851 | 3748 | 0.86 | 280  | 5.73E-80  | 162  |
| NNU_28476 | 3710 | NNU_000278 | 3486 | 0.96 | 46   | 1.05E-12  | 41   |
| NNU_28481 | 1502 | NNU_012072 | 1213 | 0.93 | 368  | 5.79E-151 | 289  |

|           |      |            |      |      |      |           |     |
|-----------|------|------------|------|------|------|-----------|-----|
| NNU_28481 | 1502 | NNU_005247 | 1065 | 0.93 | 200  | 4.98E-77  | 156 |
| NNU_28481 | 1502 | NNU_006726 | 543  | 0.88 | 95   | 1.16E-23  | 60  |
| NNU_28485 | 865  | NNU_000455 | 1143 | 0.90 | 456  | 1.49E-169 | 322 |
| NNU_28485 | 865  | NNU_023878 | 807  | 0.89 | 206  | 4.78E-70  | 143 |
| NNU_28485 | 865  | NNU_016785 | 1215 | 0.97 | 108  | 3.83E-46  | 100 |
| NNU_28485 | 865  | NNU_000069 | 897  | 0.86 | 129  | 8.40E-33  | 76  |
| NNU_28485 | 865  | NNU_003153 | 2814 | 0.98 | 62   | 6.59E-24  | 60  |
| NNU_28488 | 3291 | NNU_011458 | 1326 | 0.89 | 147  | 1.48E-45  | 100 |
| NNU_28492 | 1429 | NNU_022777 | 1804 | 0.94 | 63   | 3.08E-19  | 52  |
| NNU_28493 | 914  | NNU_001674 | 2038 | 0.97 | 37   | 5.50E-10  | 35  |
| NNU_28496 | 859  | NNU_001056 | 3362 | 0.98 | 41   | 3.09E-12  | 39  |
| NNU_28496 | 859  | NNU_002653 | 2707 | 0.94 | 47   | 1.11E-11  | 38  |
| NNU_28501 | 847  | NNU_014257 | 363  | 0.90 | 76   | 1.40E-20  | 54  |
| NNU_28502 | 1049 | NNU_026092 | 718  | 0.87 | 684  | 0         | 425 |
| NNU_28502 | 1049 | NNU_020337 | 1344 | 0.86 | 280  | 3.43E-82  | 165 |
| NNU_28502 | 1049 | NNU_024154 | 531  | 0.93 | 116  | 1.31E-41  | 92  |
| NNU_28506 | 769  | NNU_017502 | 4259 | 0.91 | 112  | 3.44E-36  | 82  |
| NNU_28508 | 824  | NNU_026335 | 1878 | 0.85 | 790  | 0         | 412 |
| NNU_28509 | 2044 | NNU_006984 | 1329 | 0.85 | 298  | 8.74E-81  | 163 |
| NNU_28509 | 2044 | NNU_006985 | 2443 | 0.93 | 122  | 3.30E-45  | 99  |
| NNU_28509 | 2044 | NNU_021438 | 3246 | 0.83 | 104  | 1.59E-18  | 51  |
| NNU_28509 | 2044 | NNU_020407 | 4104 | 1.00 | 28   | 2.70E-06  | 29  |
| NNU_28510 | 959  | NNU_001530 | 990  | 0.93 | 702  | 0         | 553 |
| NNU_28510 | 959  | NNU_023482 | 3228 | 0.91 | 665  | 0         | 491 |
| NNU_28510 | 959  | NNU_006660 | 432  | 0.92 | 377  | 7.88E-153 | 292 |
| NNU_28510 | 959  | NNU_000051 | 303  | 0.94 | 303  | 2.94E-127 | 246 |
| NNU_28510 | 959  | NNU_000052 | 456  | 0.95 | 206  | 8.64E-88  | 175 |
| NNU_28510 | 959  | NNU_007653 | 447  | 0.93 | 72   | 9.47E-23  | 58  |
| NNU_28514 | 1566 | NNU_003151 | 2354 | 0.94 | 198  | 6.67E-81  | 163 |
| NNU_28514 | 1566 | NNU_010006 | 2060 | 0.91 | 178  | 1.48E-62  | 130 |
| NNU_28514 | 1566 | NNU_003156 | 2439 | 0.88 | 197  | 3.19E-59  | 124 |
| NNU_28520 | 2620 | NNU_019366 | 2871 | 0.76 | 984  | 8.15E-127 | 246 |
| NNU_28522 | 2964 | NNU_024406 | 2545 | 0.81 | 478  | 1.59E-104 | 206 |
| NNU_28524 | 210  | NNU_026026 | 2658 | 0.84 | 181  | 2.39E-42  | 92  |
| NNU_28528 | 3332 | NNU_021169 | 1709 | 0.95 | 446  | 0         | 376 |
| NNU_28528 | 3332 | NNU_006830 | 1020 | 0.88 | 446  | 6.03E-149 | 286 |
| NNU_28528 | 3332 | NNU_025056 | 572  | 0.90 | 392  | 1.02E-141 | 273 |
| NNU_28528 | 3332 | NNU_024562 | 614  | 0.90 | 392  | 1.70E-139 | 269 |
| NNU_28528 | 3332 | NNU_004854 | 2502 | 0.91 | 332  | 2.25E-123 | 240 |
| NNU_28528 | 3332 | NNU_017436 | 470  | 0.89 | 350  | 3.76E-121 | 236 |
| NNU_28528 | 3332 | NNU_014922 | 1433 | 0.88 | 165  | 5.41E-45  | 99  |
| NNU_28528 | 3332 | NNU_007352 | 2396 | 0.92 | 119  | 1.51E-40  | 91  |
| NNU_28529 | 2295 | NNU_007952 | 1029 | 0.85 | 1004 | 0         | 543 |
| NNU_28531 | 1166 | NNU_001865 | 2929 | 0.93 | 654  | 0         | 526 |

|           |      |            |      |      |     |           |     |
|-----------|------|------------|------|------|-----|-----------|-----|
| NNU_28532 | 2737 | NNU_016842 | 4408 | 0.94 | 61  | 7.69E-18  | 50  |
| NNU_28532 | 2737 | NNU_015993 | 3325 | 0.84 | 110 | 1.65E-19  | 53  |
| NNU_28532 | 2737 | NNU_016507 | 1238 | 0.85 | 88  | 3.58E-16  | 47  |
| NNU_28532 | 2737 | NNU_005327 | 2341 | 0.80 | 120 | 2.79E-12  | 40  |
| NNU_28532 | 2737 | NNU_005729 | 1706 | 0.92 | 77  | 2.12E-23  | 60  |
| NNU_28532 | 2737 | NNU_004797 | 1906 | 0.84 | 101 | 2.77E-17  | 49  |
| NNU_28532 | 2737 | NNU_001653 | 1563 | 0.98 | 40  | 3.61E-11  | 38  |
| NNU_28532 | 2737 | NNU_003185 | 3835 | 0.95 | 59  | 2.14E-18  | 51  |
| NNU_28532 | 2737 | NNU_015940 | 766  | 0.83 | 108 | 9.95E-17  | 48  |
| NNU_28532 | 2737 | NNU_013492 | 2276 | 0.91 | 64  | 9.95E-17  | 48  |
| NNU_28532 | 2737 | NNU_009451 | 3613 | 1.00 | 28  | 3.63E-06  | 29  |
| NNU_28532 | 2737 | NNU_000605 | 1684 | 0.83 | 93  | 4.63E-15  | 45  |
| NNU_28532 | 2737 | NNU_019304 | 2730 | 0.91 | 55  | 7.75E-13  | 41  |
| NNU_28532 | 2737 | NNU_014878 | 2550 | 0.92 | 51  | 1.00E-11  | 39  |
| NNU_28532 | 2737 | NNU_000616 | 1798 | 1.00 | 37  | 3.61E-11  | 38  |
| NNU_28532 | 2737 | NNU_003455 | 2936 | 0.95 | 41  | 4.66E-10  | 36  |
| NNU_28532 | 2737 | NNU_014191 | 2828 | 0.93 | 42  | 6.03E-09  | 34  |
| NNU_28532 | 2737 | NNU_005621 | 2435 | 0.88 | 49  | 2.81E-07  | 31  |
| NNU_28541 | 1643 | NNU_006753 | 1722 | 0.97 | 276 | 1.40E-132 | 256 |
| NNU_28541 | 1643 | NNU_013733 | 3601 | 0.80 | 984 | 0         | 382 |
| NNU_28542 | 1323 | NNU_003455 | 2936 | 0.97 | 31  | 1.74E-06  | 29  |
| NNU_28544 | 2455 | NNU_009419 | 1538 | 0.91 | 103 | 2.43E-32  | 76  |
| NNU_28546 | 1232 | NNU_009336 | 1949 | 0.78 | 146 | 3.43E-18  | 50  |
| NNU_28552 | 646  | NNU_017077 | 597  | 0.93 | 94  | 2.23E-32  | 75  |
| NNU_28557 | 1257 | NNU_013464 | 350  | 0.96 | 48  | 2.72E-14  | 43  |
| NNU_28558 | 5287 | NNU_019074 | 1785 | 0.77 | 359 | 3.98E-48  | 105 |
| NNU_28558 | 5287 | NNU_022853 | 2276 | 0.91 | 97  | 2.44E-30  | 73  |
| NNU_28558 | 5287 | NNU_005931 | 2442 | 0.83 | 115 | 6.89E-21  | 56  |
| NNU_28558 | 5287 | NNU_010441 | 4874 | 0.78 | 111 | 9.04E-10  | 36  |
| NNU_28560 | 717  | NNU_026435 | 2456 | 0.87 | 256 | 6.54E-73  | 148 |
| NNU_28565 | 3228 | NNU_023685 | 2283 | 0.84 | 720 | 0         | 362 |
| NNU_28566 | 1067 | NNU_018729 | 2377 | 0.90 | 100 | 6.27E-30  | 71  |
| NNU_28567 | 7870 | NNU_003938 | 1461 | 0.90 | 351 | 1.14E-124 | 243 |
| NNU_28567 | 7870 | NNU_026227 | 994  | 0.83 | 249 | 2.72E-56  | 120 |
| NNU_28567 | 7870 | NNU_014041 | 788  | 0.89 | 165 | 5.88E-53  | 114 |
| NNU_28567 | 7870 | NNU_010471 | 499  | 0.84 | 157 | 2.80E-36  | 84  |
| NNU_28567 | 7870 | NNU_015956 | 4289 | 0.89 | 150 | 3.56E-45  | 100 |
| NNU_28567 | 7870 | NNU_010311 | 631  | 0.89 | 121 | 1.01E-35  | 83  |
| NNU_28567 | 7870 | NNU_007129 | 3240 | 0.79 | 209 | 2.81E-31  | 75  |
| NNU_28567 | 7870 | NNU_004346 | 1190 | 0.94 | 84  | 1.69E-28  | 70  |
| NNU_28567 | 7870 | NNU_009192 | 1273 | 0.94 | 82  | 2.19E-27  | 68  |
| NNU_28567 | 7870 | NNU_015993 | 3325 | 0.89 | 96  | 1.02E-25  | 65  |
| NNU_28567 | 7870 | NNU_011994 | 1295 | 0.94 | 66  | 3.69E-20  | 55  |
| NNU_28567 | 7870 | NNU_002511 | 1735 | 0.84 | 112 | 1.33E-19  | 54  |

|           |      |            |       |      |      |           |     |
|-----------|------|------------|-------|------|------|-----------|-----|
| NNU_28567 | 7870 | NNU_005327 | 2341  | 0.90 | 72   | 1.72E-18  | 52  |
| NNU_28567 | 7870 | NNU_013804 | 5355  | 0.82 | 115  | 2.22E-17  | 50  |
| NNU_28567 | 7870 | NNU_003416 | 3965  | 0.86 | 79   | 3.72E-15  | 46  |
| NNU_28567 | 7870 | NNU_008550 | 1698  | 0.81 | 105  | 3.72E-15  | 46  |
| NNU_28567 | 7870 | NNU_023405 | 3245  | 0.80 | 122  | 3.72E-15  | 46  |
| NNU_28567 | 7870 | NNU_004195 | 3693  | 1.00 | 43   | 4.81E-14  | 44  |
| NNU_28567 | 7870 | NNU_024129 | 1491  | 1.00 | 43   | 4.81E-14  | 44  |
| NNU_28567 | 7870 | NNU_000024 | 971   | 0.97 | 36   | 1.74E-08  | 34  |
| NNU_28568 | 1342 | NNU_019568 | 10194 | 0.87 | 52   | 3.79E-08  | 32  |
| NNU_28569 | 2483 | NNU_005364 | 2328  | 0.96 | 238  | 1.03E-105 | 208 |
| NNU_28569 | 2483 | NNU_014622 | 1068  | 0.86 | 267  | 6.41E-78  | 158 |
| NNU_28569 | 2483 | NNU_004777 | 2187  | 0.85 | 237  | 2.35E-62  | 130 |
| NNU_28569 | 2483 | NNU_000654 | 354   | 0.98 | 88   | 1.13E-35  | 82  |
| NNU_28569 | 2483 | NNU_009472 | 1173  | 0.98 | 39   | 1.18E-10  | 37  |
| NNU_28570 | 274  | NNU_013603 | 2154  | 0.95 | 146  | 1.87E-59  | 123 |
| NNU_28572 | 930  | NNU_011002 | 300   | 0.98 | 50   | 3.33E-17  | 48  |
| NNU_28572 | 930  | NNU_024428 | 429   | 0.91 | 65   | 3.33E-17  | 48  |
| NNU_28572 | 930  | NNU_018134 | 558   | 0.83 | 87   | 2.00E-14  | 43  |
| NNU_28577 | 3463 | NNU_006105 | 2786  | 0.83 | 165  | 7.38E-34  | 79  |
| NNU_28577 | 3463 | NNU_013010 | 2008  | 0.90 | 72   | 7.53E-19  | 52  |
| NNU_28579 | 671  | NNU_014840 | 1005  | 0.94 | 126  | 6.33E-48  | 103 |
| NNU_28579 | 671  | NNU_020839 | 1449  | 0.89 | 401  | 5.57E-138 | 265 |
| NNU_28580 | 2283 | NNU_005364 | 2328  | 0.96 | 238  | 9.44E-106 | 208 |
| NNU_28580 | 2283 | NNU_004777 | 2187  | 0.85 | 237  | 2.16E-62  | 130 |
| NNU_28580 | 2283 | NNU_014622 | 1068  | 0.90 | 147  | 7.94E-47  | 102 |
| NNU_28580 | 2283 | NNU_000654 | 354   | 0.98 | 88   | 1.04E-35  | 82  |
| NNU_28580 | 2283 | NNU_009472 | 1173  | 0.98 | 39   | 1.08E-10  | 37  |
| NNU_28585 | 904  | NNU_007068 | 2041  | 0.93 | 72   | 8.92E-23  | 58  |
| NNU_28589 | 1146 | NNU_014711 | 5268  | 0.84 | 166  | 6.65E-40  | 89  |
| NNU_28603 | 741  | NNU_008796 | 1347  | 0.90 | 80   | 7.26E-23  | 58  |
| NNU_28605 | 1282 | NNU_018787 | 1068  | 0.96 | 52   | 5.97E-16  | 46  |
| NNU_28607 | 1278 | NNU_008214 | 1188  | 0.77 | 1034 | 2.26E-159 | 304 |
| NNU_28610 | 635  | NNU_013662 | 393   | 0.94 | 160  | 3.49E-65  | 134 |
| NNU_28613 | 967  | NNU_002335 | 2572  | 0.96 | 147  | 6.98E-64  | 132 |
| NNU_28613 | 967  | NNU_011026 | 588   | 0.95 | 147  | 1.51E-60  | 126 |
| NNU_28613 | 967  | NNU_013103 | 320   | 0.94 | 145  | 9.09E-58  | 121 |
| NNU_28616 | 659  | NNU_011677 | 240   | 0.95 | 212  | 2.09E-92  | 183 |
| NNU_28616 | 659  | NNU_010366 | 3723  | 0.88 | 84   | 2.99E-21  | 55  |
| NNU_28616 | 659  | NNU_015892 | 4195  | 1.00 | 44   | 1.08E-15  | 45  |
| NNU_28618 | 903  | NNU_021231 | 543   | 0.86 | 266  | 3.83E-76  | 154 |
| NNU_28618 | 903  | NNU_016970 | 1221  | 1.00 | 86   | 6.74E-39  | 87  |
| NNU_28618 | 903  | NNU_000784 | 492   | 0.97 | 37   | 5.44E-10  | 35  |
| NNU_28620 | 1138 | NNU_020705 | 4766  | 0.89 | 69   | 1.90E-15  | 45  |
| NNU_28622 | 1661 | NNU_020874 | 1487  | 0.85 | 449  | 6.65E-126 | 244 |

|           |      |            |      |      |     |           |     |
|-----------|------|------------|------|------|-----|-----------|-----|
| NNU_28622 | 1661 | NNU_026227 | 994  | 0.82 | 396 | 3.25E-89  | 178 |
| NNU_28622 | 1661 | NNU_012322 | 549  | 0.87 | 262 | 5.51E-77  | 156 |
| NNU_28622 | 1661 | NNU_014707 | 1115 | 0.85 | 245 | 5.59E-67  | 138 |
| NNU_28622 | 1661 | NNU_008084 | 837  | 0.86 | 241 | 2.01E-66  | 137 |
| NNU_28624 | 2201 | NNU_005022 | 840  | 0.80 | 109 | 1.34E-14  | 44  |
| NNU_28625 | 1355 | NNU_026399 | 936  | 0.85 | 441 | 5.41E-126 | 244 |
| NNU_28625 | 1355 | NNU_018349 | 806  | 0.88 | 380 | 1.95E-125 | 243 |
| NNU_28625 | 1355 | NNU_020352 | 591  | 0.86 | 218 | 4.59E-62  | 129 |
| NNU_28629 | 595  | NNU_003367 | 2771 | 0.97 | 63  | 5.80E-23  | 58  |
| NNU_28633 | 3444 | NNU_001379 | 859  | 0.89 | 618 | 0         | 405 |
| NNU_28633 | 3444 | NNU_026226 | 696  | 0.89 | 455 | 7.95E-158 | 302 |
| NNU_28633 | 3444 | NNU_008783 | 1206 | 0.93 | 311 | 3.86E-126 | 245 |
| NNU_28633 | 3444 | NNU_001397 | 1838 | 0.83 | 508 | 6.50E-119 | 232 |
| NNU_28633 | 3444 | NNU_016446 | 1615 | 0.93 | 98  | 2.64E-33  | 78  |
| NNU_28633 | 3444 | NNU_009070 | 302  | 0.91 | 179 | 1.18E-61  | 129 |
| NNU_28633 | 3444 | NNU_016450 | 1756 | 0.93 | 160 | 1.97E-59  | 125 |
| NNU_28633 | 3444 | NNU_016447 | 1581 | 0.90 | 172 | 9.16E-58  | 122 |
| NNU_28633 | 3444 | NNU_007684 | 1038 | 0.92 | 108 | 1.58E-35  | 82  |
| NNU_28633 | 3444 | NNU_015388 | 612  | 0.91 | 105 | 3.41E-32  | 76  |
| NNU_28633 | 3444 | NNU_004195 | 3693 | 0.91 | 105 | 1.23E-31  | 75  |
| NNU_28633 | 3444 | NNU_024129 | 1491 | 0.98 | 53  | 2.69E-18  | 51  |
| NNU_28633 | 3444 | NNU_023930 | 743  | 0.89 | 69  | 1.62E-15  | 46  |
| NNU_28633 | 3444 | NNU_000688 | 3067 | 1.00 | 28  | 4.57E-06  | 29  |
| NNU_28634 | 1450 | NNU_025796 | 2419 | 0.89 | 163 | 2.32E-50  | 108 |
| NNU_28635 | 6113 | NNU_003067 | 4300 | 0.94 | 466 | 0         | 383 |
| NNU_28635 | 6113 | NNU_006430 | 2037 | 0.93 | 212 | 1.57E-82  | 167 |
| NNU_28635 | 6113 | NNU_025092 | 276  | 0.86 | 205 | 2.11E-56  | 120 |
| NNU_28635 | 6113 | NNU_019944 | 552  | 0.95 | 82  | 1.32E-28  | 70  |
| NNU_28637 | 3671 | NNU_011772 | 1487 | 0.95 | 182 | 4.42E-76  | 155 |
| NNU_28637 | 3671 | NNU_022688 | 2838 | 0.93 | 115 | 4.64E-41  | 92  |
| NNU_28637 | 3671 | NNU_020613 | 1272 | 0.95 | 51  | 2.24E-14  | 44  |
| NNU_28638 | 1198 | NNU_005574 | 3376 | 0.87 | 159 | 6.91E-45  | 98  |
| NNU_28645 | 3350 | NNU_021147 | 1509 | 0.98 | 65  | 5.59E-25  | 63  |
| NNU_28646 | 661  | NNU_016425 | 303  | 0.98 | 111 | 1.34E-49  | 106 |
| NNU_28646 | 661  | NNU_002214 | 1327 | 0.89 | 149 | 2.24E-47  | 102 |
| NNU_28646 | 661  | NNU_021147 | 1509 | 0.99 | 66  | 1.07E-25  | 63  |
| NNU_28647 | 6480 | NNU_009115 | 3241 | 0.95 | 286 | 1.22E-123 | 241 |
| NNU_28647 | 6480 | NNU_010378 | 5250 | 0.93 | 134 | 4.88E-48  | 105 |
| NNU_28647 | 6480 | NNU_014548 | 480  | 0.96 | 67  | 1.82E-22  | 59  |
| NNU_28647 | 6480 | NNU_014549 | 447  | 0.96 | 84  | 6.44E-32  | 76  |
| NNU_28647 | 6480 | NNU_019873 | 1204 | 0.84 | 160 | 2.98E-35  | 82  |
| NNU_28647 | 6480 | NNU_017130 | 705  | 1.00 | 39  | 6.63E-12  | 40  |
| NNU_28647 | 6480 | NNU_024724 | 626  | 1.00 | 38  | 2.38E-11  | 39  |
| NNU_28647 | 6480 | NNU_018956 | 2814 | 1.00 | 28  | 8.64E-06  | 29  |

|           |      |            |      |      |     |           |     |
|-----------|------|------------|------|------|-----|-----------|-----|
| NNU_28648 | 899  | NNU_004937 | 2734 | 0.91 | 317 | 5.99E-119 | 231 |
| NNU_28648 | 899  | NNU_014046 | 678  | 0.89 | 319 | 1.02E-106 | 209 |
| NNU_28648 | 899  | NNU_010614 | 2304 | 0.95 | 41  | 1.50E-10  | 36  |
| NNU_28654 | 545  | NNU_016963 | 745  | 0.94 | 122 | 3.07E-45  | 98  |
| NNU_28654 | 545  | NNU_025024 | 631  | 0.90 | 106 | 2.43E-31  | 73  |
| NNU_28656 | 1814 | NNU_003378 | 1052 | 1.00 | 41  | 1.42E-13  | 42  |
| NNU_28656 | 1814 | NNU_019303 | 339  | 0.84 | 224 | 6.25E-52  | 111 |
| NNU_28657 | 1821 | NNU_003825 | 345  | 0.92 | 249 | 3.54E-94  | 187 |
| NNU_28657 | 1821 | NNU_016509 | 1670 | 0.92 | 50  | 6.64E-12  | 39  |
| NNU_28657 | 1821 | NNU_022866 | 1822 | 0.83 | 166 | 1.08E-29  | 71  |
| NNU_28660 | 766  | NNU_015030 | 2648 | 0.97 | 117 | 3.35E-51  | 109 |
| NNU_28660 | 766  | NNU_021722 | 854  | 0.98 | 49  | 9.79E-17  | 47  |
| NNU_28660 | 766  | NNU_021065 | 2644 | 0.94 | 118 | 4.37E-45  | 98  |
| NNU_28660 | 766  | NNU_009284 | 2117 | 1.00 | 33  | 1.65E-09  | 34  |
| NNU_28660 | 766  | NNU_012949 | 637  | 0.93 | 69  | 3.50E-21  | 55  |
| NNU_28670 | 1924 | NNU_013930 | 1257 | 0.88 | 57  | 9.08E-11  | 37  |
| NNU_28672 | 2354 | NNU_022494 | 1632 | 0.98 | 62  | 1.82E-23  | 60  |
| NNU_28672 | 2354 | NNU_013089 | 180  | 0.88 | 67  | 1.43E-14  | 44  |
| NNU_28675 | 2442 | NNU_022510 | 3503 | 0.83 | 222 | 3.93E-50  | 108 |
| NNU_28675 | 2442 | NNU_022743 | 5044 | 0.86 | 354 | 3.66E-100 | 198 |
| NNU_28675 | 2442 | NNU_018697 | 795  | 0.98 | 42  | 8.93E-12  | 39  |
| NNU_28684 | 2659 | NNU_003997 | 1795 | 0.82 | 204 | 3.36E-41  | 92  |
| NNU_28685 | 996  | NNU_017063 | 3077 | 0.93 | 302 | 2.38E-123 | 239 |
| NNU_28685 | 996  | NNU_008519 | 246  | 0.92 | 157 | 9.37E-58  | 121 |
| NNU_28686 | 1220 | NNU_024270 | 2380 | 0.93 | 73  | 3.37E-23  | 59  |
| NNU_28686 | 1220 | NNU_009057 | 981  | 0.95 | 123 | 2.51E-49  | 106 |
| NNU_28686 | 1220 | NNU_018173 | 2463 | 0.94 | 49  | 3.42E-13  | 41  |
| NNU_28687 | 369  | NNU_003981 | 1589 | 0.86 | 186 | 7.27E-50  | 106 |
| NNU_28689 | 877  | NNU_002431 | 1983 | 0.95 | 56  | 3.13E-17  | 48  |
| NNU_28690 | 1633 | NNU_012991 | 889  | 0.85 | 76  | 1.28E-13  | 42  |
| NNU_28692 | 1762 | NNU_022523 | 768  | 0.89 | 155 | 1.02E-49  | 107 |
| NNU_28694 | 524  | NNU_025632 | 498  | 0.87 | 442 | 4.28E-143 | 274 |
| NNU_28694 | 524  | NNU_004910 | 3684 | 0.88 | 126 | 1.08E-34  | 79  |
| NNU_28695 | 1082 | NNU_026563 | 1121 | 0.96 | 71  | 1.78E-25  | 63  |
| NNU_28700 | 655  | NNU_018985 | 300  | 0.91 | 46  | 3.90E-10  | 35  |
| NNU_28700 | 655  | NNU_001523 | 4868 | 0.91 | 46  | 3.90E-10  | 35  |
| NNU_28700 | 655  | NNU_006711 | 657  | 0.91 | 46  | 3.90E-10  | 35  |
| NNU_28702 | 1777 | NNU_019074 | 1785 | 0.82 | 407 | 5.86E-82  | 165 |
| NNU_28708 | 2226 | NNU_011387 | 183  | 0.96 | 111 | 1.68E-43  | 96  |
| NNU_28708 | 2226 | NNU_003539 | 468  | 0.97 | 101 | 7.80E-42  | 93  |
| NNU_28708 | 2226 | NNU_012886 | 1791 | 0.97 | 101 | 7.80E-42  | 93  |
| NNU_28708 | 2226 | NNU_014813 | 807  | 0.89 | 117 | 1.70E-33  | 78  |
| NNU_28708 | 2226 | NNU_001103 | 3172 | 0.93 | 97  | 6.11E-33  | 77  |
| NNU_28712 | 920  | NNU_024989 | 2483 | 0.96 | 114 | 4.08E-46  | 100 |

|           |      |            |      |      |     |          |     |
|-----------|------|------------|------|------|-----|----------|-----|
| NNU_28712 | 920  | NNU_010270 | 502  | 0.99 | 140 | 1.43E-65 | 135 |
| NNU_28712 | 920  | NNU_024277 | 2705 | 0.89 | 84  | 1.17E-21 | 56  |
| NNU_28715 | 1068 | NNU_002769 | 2863 | 0.83 | 138 | 2.26E-29 | 70  |
| NNU_28719 | 3532 | NNU_025173 | 3253 | 0.89 | 92  | 5.90E-25 | 63  |
| NNU_28719 | 3532 | NNU_006219 | 2926 | 0.94 | 46  | 1.68E-10 | 37  |
| NNU_28719 | 3532 | NNU_024732 | 858  | 1.00 | 28  | 4.69E-06 | 29  |
| NNU_28721 | 3166 | NNU_020417 | 430  | 0.94 | 134 | 3.95E-51 | 110 |
| NNU_28726 | 592  | NNU_020095 | 2386 | 0.96 | 78  | 1.23E-29 | 70  |
| NNU_28726 | 592  | NNU_021769 | 964  | 0.95 | 132 | 5.53E-53 | 112 |
| NNU_28726 | 592  | NNU_016948 | 1683 | 0.92 | 128 | 9.31E-46 | 99  |
| NNU_28726 | 592  | NNU_002607 | 1519 | 0.97 | 92  | 2.03E-37 | 84  |
| NNU_28729 | 3458 | NNU_009015 | 3113 | 0.96 | 53  | 1.26E-16 | 48  |
| NNU_28730 | 3039 | NNU_009021 | 3381 | 0.87 | 185 | 2.26E-53 | 114 |
| NNU_28730 | 3039 | NNU_001192 | 2961 | 1.00 | 28  | 4.04E-06 | 29  |
| NNU_28732 | 2425 | NNU_009072 | 2083 | 0.92 | 64  | 6.81E-18 | 50  |
| NNU_28734 | 2344 | NNU_009118 | 531  | 0.77 | 461 | 2.20E-67 | 139 |
| NNU_28736 | 516  | NNU_016711 | 2328 | 0.93 | 93  | 2.29E-31 | 73  |
| NNU_28740 | 5231 | NNU_019149 | 2211 | 1.00 | 28  | 6.97E-06 | 29  |
| NNU_28741 | 593  | NNU_020782 | 303  | 0.98 | 95  | 9.40E-41 | 90  |
| NNU_28741 | 593  | NNU_004639 | 651  | 0.95 | 63  | 2.69E-21 | 55  |
| NNU_28743 | 789  | NNU_014645 | 1863 | 0.84 | 137 | 1.28E-30 | 72  |
| NNU_28743 | 789  | NNU_007898 | 777  | 0.85 | 130 | 4.60E-30 | 71  |
| NNU_28745 | 6384 | NNU_014556 | 1290 | 0.99 | 157 | 3.59E-74 | 152 |
| NNU_28745 | 6384 | NNU_014089 | 362  | 0.92 | 77  | 4.98E-23 | 60  |
| NNU_28745 | 6384 | NNU_014560 | 1095 | 1.00 | 50  | 5.01E-18 | 51  |
| NNU_28745 | 6384 | NNU_015054 | 1132 | 1.00 | 38  | 2.35E-11 | 39  |
| NNU_28746 | 2958 | NNU_008609 | 1661 | 0.99 | 68  | 1.06E-26 | 66  |
| NNU_28747 | 597  | NNU_014041 | 788  | 0.97 | 194 | 5.31E-88 | 175 |
| NNU_28747 | 597  | NNU_012832 | 2403 | 0.97 | 68  | 9.66E-26 | 63  |
| NNU_28747 | 597  | NNU_009420 | 2846 | 0.83 | 193 | 5.65E-43 | 94  |
| NNU_28747 | 597  | NNU_024547 | 800  | 0.98 | 44  | 4.56E-14 | 42  |
| NNU_28748 | 1140 | NNU_012832 | 2403 | 1.00 | 80  | 1.85E-35 | 81  |
| NNU_28748 | 1140 | NNU_009420 | 2846 | 0.89 | 78  | 2.45E-19 | 52  |
| NNU_28750 | 3672 | NNU_026508 | 858  | 0.84 | 873 | 0        | 440 |
| NNU_28750 | 3672 | NNU_026507 | 279  | 0.94 | 181 | 9.56E-73 | 149 |
| NNU_28752 | 723  | NNU_001168 | 1290 | 0.95 | 148 | 4.03E-60 | 125 |
| NNU_28752 | 723  | NNU_011457 | 1234 | 0.87 | 88  | 4.26E-20 | 53  |
| NNU_28754 | 674  | NNU_008568 | 1751 | 0.82 | 257 | 1.36E-54 | 115 |
| NNU_28764 | 1178 | NNU_011440 | 1806 | 0.89 | 186 | 2.39E-59 | 124 |
| NNU_28765 | 4491 | NNU_017394 | 2550 | 0.82 | 133 | 9.72E-24 | 61  |
| NNU_28766 | 1958 | NNU_017589 | 578  | 0.87 | 259 | 1.40E-78 | 159 |
| NNU_28768 | 6088 | NNU_023767 | 381  | 0.88 | 135 | 2.16E-36 | 84  |
| NNU_28768 | 6088 | NNU_006968 | 1126 | 0.95 | 40  | 3.75E-09 | 35  |
| NNU_28768 | 6088 | NNU_020232 | 1772 | 0.95 | 36  | 6.27E-07 | 31  |



|           |      |            |      |      |     |           |     |
|-----------|------|------------|------|------|-----|-----------|-----|
| NNU_28768 | 6088 | NNU_011106 | 3772 | 0.97 | 32  | 2.26E-06  | 30  |
| NNU_28769 | 6099 | NNU_020676 | 198  | 0.91 | 102 | 6.06E-32  | 76  |
| NNU_28773 | 917  | NNU_014831 | 2029 | 0.90 | 413 | 5.82E-154 | 294 |
| NNU_28776 | 474  | NNU_001932 | 1260 | 0.81 | 137 | 1.27E-23  | 59  |
| NNU_28777 | 6989 | NNU_023123 | 1803 | 0.88 | 170 | 2.43E-51  | 111 |
| NNU_28777 | 6989 | NNU_018179 | 2813 | 0.88 | 158 | 8.81E-46  | 101 |
| NNU_28777 | 6989 | NNU_018192 | 1620 | 0.89 | 99  | 7.00E-27  | 67  |
| NNU_28777 | 6989 | NNU_008174 | 2745 | 0.95 | 38  | 5.57E-08  | 33  |
| NNU_28777 | 6989 | NNU_020244 | 2056 | 0.93 | 40  | 7.20E-07  | 31  |
| NNU_28780 | 3875 | NNU_010096 | 3417 | 0.93 | 152 | 1.33E-56  | 120 |
| NNU_28781 | 998  | NNU_016507 | 1238 | 0.81 | 73  | 3.63E-07  | 30  |
| NNU_28783 | 3121 | NNU_012895 | 1911 | 0.88 | 212 | 4.93E-65  | 135 |
| NNU_28783 | 3121 | NNU_011702 | 1845 | 0.85 | 110 | 3.14E-22  | 58  |
| NNU_28783 | 3121 | NNU_015766 | 1262 | 1.00 | 50  | 2.44E-18  | 51  |
| NNU_28785 | 1082 | NNU_010449 | 7439 | 0.94 | 95  | 2.27E-34  | 79  |
| NNU_28785 | 1082 | NNU_024928 | 957  | 0.94 | 152 | 7.89E-59  | 123 |
| NNU_28785 | 1082 | NNU_013547 | 7682 | 0.87 | 115 | 6.36E-30  | 71  |
| NNU_28789 | 1124 | NNU_012311 | 1306 | 0.89 | 51  | 2.45E-09  | 34  |
| NNU_28790 | 1626 | NNU_026200 | 730  | 0.92 | 109 | 2.05E-36  | 83  |
| NNU_28790 | 1626 | NNU_000448 | 806  | 0.96 | 45  | 1.64E-12  | 40  |
| NNU_28790 | 1626 | NNU_002847 | 1707 | 0.84 | 521 | 1.78E-136 | 263 |
| NNU_28790 | 1626 | NNU_002846 | 1692 | 0.84 | 494 | 1.07E-133 | 258 |
| NNU_28790 | 1626 | NNU_019361 | 318  | 0.93 | 122 | 1.22E-43  | 96  |
| NNU_28790 | 1626 | NNU_008979 | 254  | 0.83 | 167 | 1.24E-33  | 78  |
| NNU_28791 | 3250 | NNU_018787 | 1068 | 0.94 | 85  | 6.97E-29  | 70  |
| NNU_28791 | 3250 | NNU_001017 | 5170 | 0.98 | 51  | 3.29E-17  | 49  |
| NNU_28791 | 3250 | NNU_006459 | 1602 | 0.96 | 45  | 3.31E-12  | 40  |
| NNU_28793 | 1315 | NNU_000448 | 806  | 0.96 | 45  | 1.33E-12  | 40  |
| NNU_28793 | 1315 | NNU_026200 | 730  | 0.92 | 109 | 1.66E-36  | 83  |
| NNU_28793 | 1315 | NNU_002847 | 1707 | 0.82 | 290 | 2.66E-64  | 133 |
| NNU_28793 | 1315 | NNU_008979 | 254  | 0.83 | 166 | 3.59E-33  | 77  |
| NNU_28793 | 1315 | NNU_019361 | 318  | 0.91 | 87  | 6.05E-26  | 64  |
| NNU_28797 | 732  | NNU_019278 | 2216 | 0.89 | 175 | 1.48E-54  | 115 |
| NNU_28801 | 854  | NNU_020456 | 1926 | 0.90 | 92  | 3.00E-27  | 66  |
| NNU_28805 | 2320 | NNU_000767 | 889  | 1.00 | 40  | 6.56E-13  | 41  |
| NNU_28811 | 1642 | NNU_015471 | 525  | 0.91 | 225 | 7.00E-81  | 163 |
| NNU_28811 | 1642 | NNU_003211 | 2967 | 0.88 | 233 | 3.28E-74  | 151 |
| NNU_28812 | 1606 | NNU_008990 | 1250 | 0.85 | 742 | 0         | 391 |
| NNU_28812 | 1606 | NNU_004694 | 1266 | 0.90 | 458 | 2.17E-170 | 324 |
| NNU_28813 | 3044 | NNU_001911 | 3248 | 0.80 | 293 | 3.79E-51  | 110 |
| NNU_28814 | 2503 | NNU_001908 | 2718 | 0.86 | 499 | 1.63E-148 | 285 |
| NNU_28815 | 806  | NNU_001886 | 1377 | 0.87 | 295 | 2.01E-88  | 176 |
| NNU_28816 | 824  | NNU_006163 | 690  | 1.00 | 67  | 2.24E-28  | 68  |
| NNU_28818 | 971  | NNU_026411 | 1916 | 0.82 | 309 | 5.42E-65  | 134 |

|           |      |            |      |      |      |           |     |
|-----------|------|------------|------|------|------|-----------|-----|
| NNU_28819 | 1700 | NNU_014024 | 1499 | 0.85 | 247  | 7.46E-61  | 127 |
| NNU_28819 | 1700 | NNU_021510 | 4261 | 0.97 | 115  | 4.55E-48  | 104 |
| NNU_28821 | 1129 | NNU_020034 | 1148 | 0.84 | 622  | 3.26E-172 | 327 |
| NNU_28829 | 2573 | NNU_020141 | 1094 | 0.89 | 815  | 0         | 528 |
| NNU_28829 | 2573 | NNU_003103 | 867  | 0.89 | 305  | 8.29E-102 | 201 |
| NNU_28829 | 2573 | NNU_020911 | 1942 | 0.87 | 266  | 2.39E-77  | 157 |
| NNU_28829 | 2573 | NNU_008212 | 1914 | 0.94 | 110  | 1.51E-39  | 89  |
| NNU_28829 | 2573 | NNU_021319 | 2166 | 0.90 | 120  | 2.53E-37  | 85  |
| NNU_28829 | 2573 | NNU_010094 | 3573 | 1.00 | 43   | 1.56E-14  | 44  |
| NNU_28831 | 947  | NNU_020635 | 955  | 0.94 | 308  | 1.34E-130 | 252 |
| NNU_28831 | 947  | NNU_015481 | 1327 | 0.92 | 224  | 1.10E-86  | 173 |
| NNU_28831 | 947  | NNU_023123 | 1803 | 0.91 | 89   | 3.34E-27  | 66  |
| NNU_28831 | 947  | NNU_003163 | 4594 | 0.98 | 50   | 3.39E-17  | 48  |
| NNU_28833 | 2310 | NNU_020141 | 1094 | 0.89 | 815  | 0         | 528 |
| NNU_28833 | 2310 | NNU_003103 | 867  | 0.89 | 305  | 7.44E-102 | 201 |
| NNU_28833 | 2310 | NNU_020911 | 1942 | 0.87 | 267  | 5.96E-78  | 158 |
| NNU_28833 | 2310 | NNU_008212 | 1914 | 0.94 | 110  | 1.35E-39  | 89  |
| NNU_28833 | 2310 | NNU_021319 | 2166 | 0.90 | 120  | 2.27E-37  | 85  |
| NNU_28833 | 2310 | NNU_010094 | 3573 | 1.00 | 43   | 1.40E-14  | 44  |
| NNU_28834 | 2085 | NNU_002949 | 2466 | 0.87 | 262  | 1.49E-78  | 159 |
| NNU_28834 | 2085 | NNU_005948 | 3374 | 0.90 | 189  | 4.24E-64  | 133 |
| NNU_28834 | 2085 | NNU_017127 | 951  | 0.91 | 100  | 2.66E-31  | 74  |
| NNU_28834 | 2085 | NNU_021409 | 210  | 0.91 | 100  | 2.66E-31  | 74  |
| NNU_28836 | 3990 | NNU_021097 | 5202 | 0.92 | 1146 | 0         | 859 |
| NNU_28836 | 3990 | NNU_009478 | 1294 | 0.87 | 403  | 2.07E-129 | 251 |
| NNU_28836 | 3990 | NNU_020461 | 999  | 0.96 | 135  | 1.78E-55  | 118 |
| NNU_28836 | 3990 | NNU_004475 | 691  | 0.95 | 55   | 5.23E-16  | 47  |
| NNU_28837 | 836  | NNU_019074 | 1785 | 0.92 | 86   | 2.94E-27  | 66  |
| NNU_28838 | 707  | NNU_014145 | 835  | 0.94 | 51   | 1.51E-14  | 43  |
| NNU_28838 | 707  | NNU_020169 | 1194 | 0.88 | 106  | 6.87E-28  | 67  |
| NNU_28842 | 2673 | NNU_026562 | 660  | 0.98 | 51   | 2.70E-17  | 49  |
| NNU_28842 | 2673 | NNU_026456 | 961  | 0.89 | 174  | 5.53E-54  | 115 |
| NNU_28842 | 2673 | NNU_026537 | 251  | 0.90 | 160  | 7.15E-53  | 113 |
| NNU_28842 | 2673 | NNU_015157 | 549  | 0.89 | 158  | 2.00E-48  | 105 |
| NNU_28842 | 2673 | NNU_018691 | 1866 | 0.95 | 55   | 3.50E-16  | 47  |
| NNU_28842 | 2673 | NNU_006163 | 690  | 0.93 | 76   | 5.77E-24  | 61  |
| NNU_28843 | 177  | NNU_006163 | 690  | 1.00 | 71   | 2.58E-31  | 72  |
| NNU_28845 | 739  | NNU_011399 | 1687 | 0.86 | 401  | 8.19E-117 | 227 |
| NNU_28845 | 739  | NNU_004871 | 1827 | 0.91 | 273  | 3.01E-101 | 199 |
| NNU_28846 | 521  | NNU_018102 | 4107 | 0.98 | 87   | 2.30E-36  | 82  |
| NNU_28846 | 521  | NNU_001090 | 3043 | 0.97 | 59   | 8.44E-21  | 54  |
| NNU_28847 | 2348 | NNU_025674 | 1577 | 0.85 | 1172 | 0         | 642 |
| NNU_28847 | 2348 | NNU_020668 | 4831 | 0.89 | 125  | 4.99E-34  | 79  |
| NNU_28847 | 2348 | NNU_025173 | 3253 | 0.86 | 91   | 1.42E-19  | 53  |

|           |      |            |      |      |      |           |     |
|-----------|------|------------|------|------|------|-----------|-----|
| NNU_28847 | 2348 | NNU_006219 | 2926 | 0.94 | 46   | 1.11E-10  | 37  |
| NNU_28849 | 2034 | NNU_010311 | 631  | 0.95 | 61   | 1.23E-19  | 53  |
| NNU_28856 | 3028 | NNU_003419 | 2088 | 0.80 | 301  | 2.25E-53  | 114 |
| NNU_28858 | 1859 | NNU_025539 | 2646 | 0.93 | 1009 | 0         | 793 |
| NNU_28858 | 1859 | NNU_012068 | 1650 | 0.92 | 363  | 1.56E-147 | 283 |
| NNU_28858 | 1859 | NNU_020512 | 795  | 0.93 | 513  | 0         | 414 |
| NNU_28858 | 1859 | NNU_026066 | 2602 | 0.80 | 995  | 0         | 395 |
| NNU_28858 | 1859 | NNU_005177 | 345  | 0.91 | 338  | 5.76E-127 | 246 |
| NNU_28858 | 1859 | NNU_019302 | 300  | 0.88 | 292  | 7.77E-96  | 190 |
| NNU_28858 | 1859 | NNU_026178 | 1896 | 1.00 | 30   | 1.90E-07  | 31  |
| NNU_28861 | 981  | NNU_008540 | 870  | 1.00 | 29   | 3.56E-07  | 30  |
| NNU_28861 | 981  | NNU_003570 | 1390 | 0.95 | 128  | 3.34E-52  | 111 |
| NNU_28861 | 981  | NNU_008738 | 495  | 0.91 | 135  | 4.35E-46  | 100 |
| NNU_28861 | 981  | NNU_017733 | 1061 | 0.94 | 35   | 1.28E-06  | 29  |
| NNU_28862 | 670  | NNU_005197 | 4773 | 0.92 | 114  | 1.38E-39  | 88  |
| NNU_28862 | 670  | NNU_004498 | 794  | 0.86 | 108  | 1.09E-25  | 63  |
| NNU_28865 | 2434 | NNU_012101 | 2352 | 0.95 | 152  | 1.78E-63  | 132 |
| NNU_28865 | 2434 | NNU_008855 | 2424 | 0.88 | 274  | 2.23E-87  | 175 |
| NNU_28865 | 2434 | NNU_003848 | 3709 | 0.90 | 138  | 5.10E-44  | 97  |
| NNU_28865 | 2434 | NNU_003851 | 3204 | 0.84 | 130  | 6.74E-28  | 68  |
| NNU_28865 | 2434 | NNU_024054 | 826  | 0.95 | 43   | 1.15E-10  | 37  |
| NNU_28865 | 2434 | NNU_018466 | 984  | 0.95 | 39   | 5.36E-09  | 34  |
| NNU_28865 | 2434 | NNU_009394 | 1833 | 1.00 | 33   | 5.36E-09  | 34  |
| NNU_28871 | 5629 | NNU_005921 | 1509 | 0.95 | 58   | 1.59E-17  | 50  |
| NNU_28871 | 5629 | NNU_000105 | 8491 | 0.96 | 49   | 3.44E-14  | 44  |
| NNU_28871 | 5629 | NNU_023190 | 3293 | 0.94 | 48   | 5.76E-12  | 40  |
| NNU_28871 | 5629 | NNU_022848 | 3240 | 1.00 | 28   | 7.50E-06  | 29  |
| NNU_28872 | 1306 | NNU_014495 | 1994 | 0.93 | 213  | 3.32E-83  | 167 |
| NNU_28872 | 1306 | NNU_002958 | 2059 | 0.97 | 185  | 9.23E-84  | 168 |
| NNU_28874 | 678  | NNU_011232 | 593  | 0.98 | 47   | 1.12E-15  | 45  |
| NNU_28878 | 3230 | NNU_006016 | 2196 | 0.91 | 64   | 4.23E-16  | 47  |
| NNU_28879 | 2581 | NNU_004581 | 1181 | 0.91 | 55   | 7.30E-13  | 41  |
| NNU_28883 | 2120 | NNU_003938 | 1461 | 0.88 | 237  | 3.31E-70  | 144 |
| NNU_28883 | 2120 | NNU_004346 | 1190 | 0.94 | 71   | 1.64E-23  | 60  |
| NNU_28883 | 2120 | NNU_018291 | 2135 | 0.95 | 54   | 9.95E-16  | 46  |
| NNU_28883 | 2120 | NNU_015956 | 4289 | 1.00 | 31   | 6.03E-08  | 32  |
| NNU_28884 | 981  | NNU_016533 | 1944 | 0.96 | 168  | 5.40E-75  | 152 |
| NNU_28885 | 3713 | NNU_004207 | 865  | 1.00 | 29   | 1.37E-06  | 30  |
| NNU_28886 | 1489 | NNU_007199 | 1015 | 0.91 | 125  | 1.86E-41  | 92  |
| NNU_28886 | 1489 | NNU_017830 | 2367 | 0.78 | 362  | 8.43E-60  | 125 |
| NNU_28886 | 1489 | NNU_017823 | 1441 | 0.80 | 236  | 4.01E-43  | 95  |
| NNU_28886 | 1489 | NNU_019906 | 806  | 0.97 | 32   | 5.45E-07  | 30  |
| NNU_28887 | 3134 | NNU_012101 | 2352 | 0.95 | 152  | 1.07E-61  | 129 |
| NNU_28887 | 3134 | NNU_008855 | 2424 | 0.91 | 189  | 3.82E-66  | 137 |

|           |      |            |      |      |      |           |     |
|-----------|------|------------|------|------|------|-----------|-----|
| NNU_28887 | 3134 | NNU_003848 | 3709 | 0.90 | 138  | 6.58E-44  | 97  |
| NNU_28887 | 3134 | NNU_003851 | 3204 | 0.84 | 130  | 8.70E-28  | 68  |
| NNU_28887 | 3134 | NNU_018466 | 984  | 0.95 | 39   | 6.92E-09  | 34  |
| NNU_28887 | 3134 | NNU_009394 | 1833 | 1.00 | 33   | 6.92E-09  | 34  |
| NNU_28887 | 3134 | NNU_024054 | 826  | 0.93 | 43   | 6.92E-09  | 34  |
| NNU_28893 | 2199 | NNU_019118 | 1347 | 0.84 | 1187 | 0         | 630 |
| NNU_28895 | 1563 | NNU_018643 | 1709 | 0.86 | 354  | 1.39E-102 | 202 |
| NNU_28898 | 1025 | NNU_023333 | 3078 | 0.94 | 53   | 1.71E-15  | 45  |
| NNU_28903 | 1713 | NNU_010538 | 6731 | 0.94 | 274  | 2.50E-115 | 225 |
| NNU_28903 | 1713 | NNU_020635 | 955  | 0.96 | 103  | 2.15E-41  | 92  |
| NNU_28903 | 1713 | NNU_009893 | 1567 | 0.85 | 163  | 7.73E-41  | 91  |
| NNU_28903 | 1713 | NNU_015481 | 1327 | 0.89 | 128  | 1.00E-39  | 89  |
| NNU_28903 | 1713 | NNU_011697 | 1843 | 0.97 | 91   | 2.17E-36  | 83  |
| NNU_28903 | 1713 | NNU_023123 | 1803 | 0.92 | 89   | 1.31E-28  | 69  |
| NNU_28903 | 1713 | NNU_003163 | 4594 | 0.97 | 61   | 2.21E-21  | 56  |
| NNU_28906 | 1286 | NNU_024796 | 1375 | 0.86 | 92   | 3.58E-18  | 50  |
| NNU_28906 | 1286 | NNU_012898 | 1785 | 0.92 | 137  | 9.54E-49  | 105 |
| NNU_28909 | 2505 | NNU_025890 | 2498 | 0.93 | 521  | 0         | 408 |
| NNU_28909 | 2505 | NNU_007445 | 690  | 0.94 | 119  | 4.06E-45  | 99  |
| NNU_28909 | 2505 | NNU_026362 | 1544 | 0.96 | 47   | 7.09E-13  | 41  |
| NNU_28909 | 2505 | NNU_016698 | 2040 | 0.87 | 544  | 2.61E-176 | 335 |
| NNU_28909 | 2505 | NNU_007444 | 1545 | 0.85 | 246  | 1.42E-64  | 134 |
| NNU_28909 | 2505 | NNU_007740 | 4566 | 0.93 | 87   | 5.36E-29  | 70  |
| NNU_28909 | 2505 | NNU_001988 | 853  | 0.81 | 119  | 5.44E-19  | 52  |
| NNU_28909 | 2505 | NNU_005639 | 1620 | 0.92 | 62   | 9.10E-17  | 48  |
| NNU_28911 | 676  | NNU_025173 | 3253 | 0.94 | 48   | 6.70E-13  | 40  |
| NNU_28911 | 676  | NNU_006219 | 2926 | 0.92 | 48   | 1.12E-10  | 36  |
| NNU_28912 | 1159 | NNU_023328 | 3699 | 0.90 | 67   | 1.50E-16  | 47  |
| NNU_28916 | 851  | NNU_026415 | 1804 | 0.89 | 230  | 1.30E-75  | 153 |
| NNU_28916 | 851  | NNU_023534 | 891  | 0.86 | 249  | 1.01E-71  | 146 |
| NNU_28918 | 5402 | NNU_018708 | 6151 | 0.96 | 225  | 4.86E-102 | 202 |
| NNU_28918 | 5402 | NNU_001397 | 1838 | 0.86 | 210  | 1.86E-56  | 120 |
| NNU_28918 | 5402 | NNU_021975 | 1059 | 0.91 | 134  | 8.79E-45  | 99  |
| NNU_28918 | 5402 | NNU_021976 | 2883 | 0.91 | 131  | 4.09E-43  | 96  |
| NNU_28918 | 5402 | NNU_021697 | 432  | 0.88 | 146  | 4.09E-43  | 96  |
| NNU_28918 | 5402 | NNU_015566 | 813  | 0.87 | 93   | 5.44E-22  | 58  |
| NNU_28918 | 5402 | NNU_024129 | 1491 | 0.96 | 49   | 3.30E-14  | 44  |
| NNU_28918 | 5402 | NNU_002750 | 2172 | 1.00 | 28   | 7.19E-06  | 29  |
| NNU_28919 | 1235 | NNU_016696 | 2793 | 0.94 | 461  | 0         | 380 |
| NNU_28919 | 1235 | NNU_021168 | 1704 | 0.83 | 242  | 1.97E-50  | 108 |
| NNU_28922 | 1207 | NNU_020540 | 843  | 0.93 | 106  | 1.52E-36  | 83  |
| NNU_28922 | 1207 | NNU_017467 | 1667 | 0.95 | 76   | 1.54E-26  | 65  |
| NNU_28923 | 7523 | NNU_001144 | 2131 | 0.82 | 816  | 0         | 360 |
| NNU_28923 | 7523 | NNU_019395 | 4780 | 0.87 | 59   | 1.29E-09  | 36  |

|           |      |            |       |      |      |           |      |
|-----------|------|------------|-------|------|------|-----------|------|
| NNU_28924 | 1192 | NNU_008368 | 1084  | 1.00 | 44   | 1.99E-15  | 45   |
| NNU_28926 | 3004 | NNU_004920 | 1787  | 0.94 | 1569 | 0         | 1278 |
| NNU_28927 | 1354 | NNU_023422 | 1046  | 0.89 | 397  | 1.92E-135 | 261  |
| NNU_28929 | 2221 | NNU_020769 | 1883  | 0.94 | 64   | 1.34E-19  | 53   |
| NNU_28930 | 565  | NNU_015737 | 3181  | 0.96 | 159  | 1.11E-69  | 142  |
| NNU_28932 | 6995 | NNU_010754 | 548   | 0.83 | 170  | 1.16E-34  | 81   |
| NNU_28934 | 2345 | NNU_020769 | 1883  | 0.94 | 64   | 1.41E-19  | 53   |
| NNU_28938 | 762  | NNU_010677 | 3117  | 0.90 | 377  | 2.29E-137 | 264  |
| NNU_28943 | 688  | NNU_011226 | 2535  | 0.97 | 66   | 1.45E-24  | 61   |
| NNU_28943 | 688  | NNU_011227 | 488   | 0.96 | 152  | 1.06E-65  | 135  |
| NNU_28943 | 688  | NNU_023931 | 3240  | 0.86 | 96   | 1.88E-18  | 50   |
| NNU_28943 | 688  | NNU_007456 | 3350  | 0.88 | 68   | 1.13E-15  | 45   |
| NNU_28947 | 6098 | NNU_016168 | 548   | 0.98 | 315  | 1.10E-153 | 295  |
| NNU_28947 | 6098 | NNU_024230 | 945   | 0.92 | 58   | 1.34E-13  | 43   |
| NNU_28948 | 903  | NNU_010824 | 1317  | 0.98 | 102  | 6.69E-44  | 96   |
| NNU_28948 | 903  | NNU_012294 | 734   | 0.98 | 100  | 8.66E-43  | 94   |
| NNU_28948 | 903  | NNU_025919 | 2427  | 0.92 | 67   | 1.93E-19  | 52   |
| NNU_28948 | 903  | NNU_008146 | 846   | 1.00 | 33   | 1.96E-09  | 34   |
| NNU_28948 | 903  | NNU_013877 | 1412  | 0.86 | 98   | 3.20E-22  | 57   |
| NNU_28949 | 2534 | NNU_011501 | 6083  | 0.97 | 150  | 8.58E-67  | 138  |
| NNU_28949 | 2534 | NNU_011500 | 1982  | 0.95 | 41   | 1.55E-09  | 35   |
| NNU_28954 | 2661 | NNU_011609 | 1392  | 0.92 | 129  | 1.20E-45  | 100  |
| NNU_28954 | 2661 | NNU_007684 | 1038  | 0.90 | 93   | 2.65E-27  | 67   |
| NNU_28955 | 755  | NNU_018547 | 694   | 0.81 | 312  | 1.51E-59  | 124  |
| NNU_28955 | 755  | NNU_009639 | 2438  | 0.87 | 100  | 2.06E-23  | 59   |
| NNU_28955 | 755  | NNU_010316 | 2507  | 0.88 | 72   | 9.65E-17  | 47   |
| NNU_28956 | 1929 | NNU_008587 | 693   | 0.88 | 56   | 3.27E-10  | 36   |
| NNU_28957 | 1467 | NNU_000490 | 1074  | 0.81 | 412  | 1.33E-87  | 175  |
| NNU_28957 | 1467 | NNU_022223 | 1549  | 0.94 | 152  | 1.79E-61  | 128  |
| NNU_28957 | 1467 | NNU_022447 | 739   | 0.97 | 71   | 5.22E-27  | 66   |
| NNU_28957 | 1467 | NNU_015615 | 1467  | 0.96 | 49   | 8.85E-15  | 44   |
| NNU_28967 | 4799 | NNU_000191 | 483   | 0.92 | 422  | 6.54E-170 | 324  |
| NNU_28967 | 4799 | NNU_001477 | 1002  | 0.82 | 127  | 6.25E-21  | 56   |
| NNU_28968 | 1386 | NNU_021251 | 2214  | 0.93 | 404  | 4.04E-167 | 318  |
| NNU_28968 | 1386 | NNU_011227 | 488   | 0.95 | 255  | 1.21E-112 | 220  |
| NNU_28968 | 1386 | NNU_011226 | 2535  | 0.94 | 67   | 1.78E-21  | 56   |
| NNU_28968 | 1386 | NNU_023931 | 3240  | 0.86 | 96   | 3.86E-18  | 50   |
| NNU_28970 | 5069 | NNU_025920 | 13099 | 0.85 | 100  | 8.55E-20  | 54   |
| NNU_28972 | 2430 | NNU_011381 | 381   | 0.97 | 35   | 1.92E-08  | 33   |
| NNU_28977 | 897  | NNU_006903 | 340   | 0.97 | 37   | 5.40E-10  | 35   |
| NNU_28977 | 897  | NNU_021621 | 1119  | 0.95 | 36   | 9.04E-08  | 31   |
| NNU_28978 | 2961 | NNU_003378 | 1052  | 0.93 | 56   | 5.01E-15  | 45   |
| NNU_28978 | 2961 | NNU_022055 | 324   | 1.00 | 33   | 6.53E-09  | 34   |
| NNU_28978 | 2961 | NNU_011118 | 3176  | 0.80 | 143  | 1.38E-20  | 55   |

|           |      |            |      |      |      |           |     |
|-----------|------|------------|------|------|------|-----------|-----|
| NNU_28978 | 2961 | NNU_018686 | 1056 | 0.93 | 60   | 3.00E-17  | 49  |
| NNU_28978 | 2961 | NNU_019632 | 501  | 0.93 | 60   | 3.00E-17  | 49  |
| NNU_28978 | 2961 | NNU_005096 | 297  | 0.94 | 35   | 3.93E-06  | 29  |
| NNU_28987 | 482  | NNU_011232 | 593  | 0.90 | 260  | 7.05E-91  | 180 |
| NNU_28987 | 482  | NNU_008441 | 1168 | 0.90 | 61   | 2.82E-15  | 44  |
| NNU_28987 | 482  | NNU_006968 | 1126 | 0.95 | 42   | 7.89E-11  | 36  |
| NNU_28987 | 482  | NNU_002653 | 2707 | 0.93 | 41   | 1.32E-08  | 32  |
| NNU_28988 | 849  | NNU_012834 | 354  | 0.91 | 100  | 1.38E-30  | 72  |
| NNU_28995 | 2557 | NNU_021459 | 2463 | 0.92 | 112  | 6.98E-38  | 86  |
| NNU_28995 | 2557 | NNU_008777 | 3527 | 0.73 | 1406 | 2.82E-136 | 263 |
| NNU_28995 | 2557 | NNU_015448 | 492  | 0.94 | 227  | 1.39E-94  | 188 |
| NNU_28995 | 2557 | NNU_015335 | 1380 | 0.87 | 196  | 3.16E-56  | 119 |
| NNU_28995 | 2557 | NNU_002493 | 1433 | 0.86 | 117  | 2.55E-27  | 67  |
| NNU_28999 | 882  | NNU_014507 | 2971 | 0.94 | 259  | 4.61E-110 | 215 |
| NNU_28999 | 882  | NNU_011446 | 1556 | 0.97 | 190  | 2.20E-88  | 176 |
| NNU_28999 | 882  | NNU_010229 | 271  | 0.98 | 185  | 2.85E-87  | 174 |
| NNU_28999 | 882  | NNU_002573 | 2001 | 0.88 | 187  | 6.40E-59  | 123 |
| NNU_28999 | 882  | NNU_024547 | 800  | 0.97 | 127  | 4.98E-55  | 116 |
| NNU_28999 | 882  | NNU_008264 | 651  | 0.95 | 110  | 6.53E-44  | 96  |
| NNU_29006 | 1224 | NNU_010614 | 2304 | 0.98 | 42   | 1.23E-12  | 40  |
| NNU_29007 | 1266 | NNU_019029 | 3084 | 0.93 | 132  | 1.22E-47  | 103 |
| NNU_29009 | 1249 | NNU_012817 | 870  | 0.89 | 206  | 4.22E-62  | 129 |
| NNU_29010 | 2629 | NNU_020911 | 1942 | 0.91 | 382  | 7.95E-147 | 282 |
| NNU_29010 | 2629 | NNU_010376 | 799  | 0.91 | 356  | 2.24E-137 | 265 |
| NNU_29010 | 2629 | NNU_007644 | 517  | 0.90 | 274  | 8.53E-97  | 192 |
| NNU_29011 | 975  | NNU_003172 | 390  | 0.91 | 300  | 8.48E-113 | 220 |
| NNU_29016 | 1999 | NNU_021693 | 2329 | 0.84 | 143  | 9.17E-31  | 73  |
| NNU_29021 | 7803 | NNU_020055 | 1521 | 0.91 | 113  | 2.77E-36  | 84  |
| NNU_29021 | 7803 | NNU_010499 | 1645 | 0.89 | 113  | 2.79E-31  | 75  |
| NNU_29021 | 7803 | NNU_024142 | 855  | 0.89 | 70   | 1.03E-15  | 47  |
| NNU_29021 | 7803 | NNU_020037 | 5013 | 0.87 | 53   | 6.21E-08  | 33  |
| NNU_29022 | 2745 | NNU_004737 | 1642 | 0.88 | 93   | 5.92E-24  | 61  |
| NNU_29030 | 518  | NNU_014840 | 1005 | 0.91 | 437  | 4.06E-173 | 328 |
| NNU_29030 | 518  | NNU_020839 | 1449 | 0.91 | 437  | 4.08E-168 | 319 |
| NNU_29037 | 1324 | NNU_021762 | 334  | 0.95 | 55   | 1.72E-16  | 47  |
| NNU_29038 | 2786 | NNU_022143 | 723  | 0.97 | 36   | 6.14E-09  | 34  |
| NNU_29039 | 818  | NNU_013504 | 750  | 0.93 | 116  | 2.81E-42  | 93  |
| NNU_29041 | 550  | NNU_002946 | 679  | 0.84 | 330  | 1.76E-82  | 165 |
| NNU_29042 | 2038 | NNU_011677 | 240  | 0.94 | 211  | 5.17E-88  | 176 |
| NNU_29048 | 1243 | NNU_019579 | 2292 | 0.94 | 205  | 6.78E-85  | 170 |
| NNU_29048 | 1243 | NNU_011543 | 462  | 0.90 | 161  | 7.08E-55  | 116 |
| NNU_29048 | 1243 | NNU_015766 | 1262 | 0.99 | 88   | 3.36E-38  | 86  |
| NNU_29048 | 1243 | NNU_008078 | 492  | 0.92 | 87   | 1.23E-27  | 67  |
| NNU_29049 | 2936 | NNU_000044 | 1935 | 0.90 | 599  | 0         | 413 |

|           |      |            |      |      |      |           |     |
|-----------|------|------------|------|------|------|-----------|-----|
| NNU_29049 | 2936 | NNU_019609 | 798  | 0.95 | 419  | 0         | 359 |
| NNU_29049 | 2936 | NNU_022735 | 2216 | 0.95 | 424  | 0         | 358 |
| NNU_29049 | 2936 | NNU_017016 | 1350 | 0.88 | 472  | 2.44E-157 | 301 |
| NNU_29049 | 2936 | NNU_009334 | 1344 | 0.84 | 468  | 1.18E-125 | 244 |
| NNU_29049 | 2936 | NNU_017191 | 1101 | 0.93 | 222  | 1.61E-89  | 179 |
| NNU_29049 | 2936 | NNU_024360 | 1156 | 0.91 | 237  | 2.08E-88  | 177 |
| NNU_29049 | 2936 | NNU_010456 | 2864 | 0.85 | 190  | 1.70E-49  | 107 |
| NNU_29049 | 2936 | NNU_004799 | 2484 | 0.88 | 147  | 2.87E-42  | 94  |
| NNU_29050 | 2133 | NNU_007873 | 2369 | 0.81 | 309  | 2.02E-62  | 130 |
| NNU_29051 | 4345 | NNU_004084 | 627  | 0.90 | 600  | 0         | 396 |
| NNU_29053 | 2140 | NNU_018295 | 1659 | 0.92 | 95   | 1.27E-29  | 71  |
| NNU_29053 | 2140 | NNU_000105 | 8491 | 0.92 | 95   | 1.27E-29  | 71  |
| NNU_29053 | 2140 | NNU_005932 | 2459 | 0.85 | 101  | 2.77E-21  | 56  |
| NNU_29053 | 2140 | NNU_023190 | 3293 | 1.00 | 35   | 3.64E-10  | 36  |
| NNU_29054 | 1891 | NNU_003289 | 864  | 0.95 | 728  | 0         | 619 |
| NNU_29054 | 1891 | NNU_013064 | 905  | 0.93 | 89   | 3.12E-30  | 72  |
| NNU_29054 | 1891 | NNU_021196 | 464  | 0.90 | 89   | 3.14E-25  | 63  |
| NNU_29054 | 1891 | NNU_021184 | 740  | 0.97 | 65   | 1.46E-23  | 60  |
| NNU_29054 | 1891 | NNU_019902 | 543  | 0.89 | 88   | 5.26E-23  | 59  |
| NNU_29054 | 1891 | NNU_001639 | 357  | 0.96 | 55   | 5.29E-18  | 50  |
| NNU_29055 | 3385 | NNU_019470 | 6016 | 0.85 | 133  | 4.34E-31  | 74  |
| NNU_29055 | 3385 | NNU_013312 | 857  | 0.87 | 133  | 1.55E-35  | 82  |
| NNU_29055 | 3385 | NNU_001805 | 2153 | 0.82 | 109  | 9.52E-18  | 50  |
| NNU_29056 | 1475 | NNU_022143 | 723  | 0.89 | 344  | 2.13E-120 | 234 |
| NNU_29065 | 413  | NNU_023804 | 1092 | 0.86 | 175  | 2.28E-50  | 107 |
| NNU_29065 | 413  | NNU_001324 | 997  | 0.97 | 34   | 1.12E-08  | 32  |
| NNU_29069 | 2697 | NNU_000666 | 1137 | 0.80 | 1015 | 0         | 411 |
| NNU_29073 | 4615 | NNU_014511 | 1173 | 0.88 | 100  | 1.66E-26  | 66  |
| NNU_29081 | 5042 | NNU_006983 | 213  | 0.89 | 165  | 2.27E-50  | 109 |
| NNU_29081 | 5042 | NNU_025660 | 459  | 0.91 | 103  | 1.80E-31  | 75  |
| NNU_29081 | 5042 | NNU_008046 | 3016 | 0.93 | 78   | 3.04E-24  | 62  |
| NNU_29081 | 5042 | NNU_002638 | 1239 | 0.98 | 62   | 3.93E-23  | 60  |
| NNU_29081 | 5042 | NNU_011497 | 1252 | 0.92 | 62   | 1.84E-16  | 48  |
| NNU_29085 | 691  | NNU_004329 | 1143 | 0.98 | 80   | 2.40E-32  | 75  |
| NNU_29086 | 546  | NNU_025820 | 1162 | 0.89 | 160  | 8.50E-51  | 108 |
| NNU_29086 | 546  | NNU_021602 | 945  | 0.98 | 199  | 2.87E-95  | 188 |
| NNU_29086 | 546  | NNU_023845 | 276  | 0.87 | 181  | 1.84E-47  | 102 |
| NNU_29086 | 546  | NNU_025821 | 828  | 0.97 | 67   | 3.17E-25  | 62  |
| NNU_29087 | 853  | NNU_025820 | 1162 | 0.96 | 220  | 2.10E-98  | 194 |
| NNU_29087 | 853  | NNU_021602 | 945  | 0.98 | 166  | 6.01E-79  | 159 |
| NNU_29087 | 853  | NNU_006230 | 2901 | 0.92 | 211  | 2.16E-78  | 158 |
| NNU_29087 | 853  | NNU_023844 | 1608 | 0.97 | 117  | 1.74E-49  | 106 |
| NNU_29094 | 1897 | NNU_017211 | 870  | 0.93 | 574  | 0         | 460 |
| NNU_29095 | 1136 | NNU_023185 | 399  | 0.82 | 255  | 8.35E-54  | 114 |

|           |      |            |      |      |     |           |     |
|-----------|------|------------|------|------|-----|-----------|-----|
| NNU_29098 | 923  | NNU_012854 | 525  | 1.00 | 49  | 2.55E-18  | 50  |
| NNU_29098 | 923  | NNU_009636 | 2013 | 1.00 | 49  | 2.55E-18  | 50  |
| NNU_29099 | 6349 | NNU_009613 | 1062 | 0.92 | 100 | 1.76E-32  | 77  |
| NNU_29100 | 6239 | NNU_017182 | 504  | 1.00 | 78  | 1.33E-33  | 79  |
| NNU_29107 | 1258 | NNU_003562 | 3733 | 0.95 | 38  | 9.88E-09  | 33  |
| NNU_29108 | 1351 | NNU_017805 | 417  | 0.92 | 168 | 2.13E-60  | 126 |
| NNU_29115 | 1027 | NNU_026106 | 1451 | 0.87 | 169 | 2.73E-48  | 104 |
| NNU_29116 | 1740 | NNU_017865 | 2289 | 0.91 | 64  | 6.29E-17  | 48  |
| NNU_29122 | 2250 | NNU_000489 | 1131 | 0.91 | 256 | 1.58E-93  | 186 |
| NNU_29122 | 2250 | NNU_020788 | 1443 | 0.84 | 181 | 1.69E-43  | 96  |
| NNU_29125 | 1865 | NNU_004127 | 3180 | 0.85 | 103 | 6.70E-22  | 57  |
| NNU_29125 | 1865 | NNU_021076 | 1228 | 0.95 | 182 | 6.20E-77  | 156 |
| NNU_29133 | 3376 | NNU_009937 | 1083 | 0.95 | 54  | 5.72E-15  | 45  |
| NNU_29133 | 3376 | NNU_021979 | 1973 | 0.97 | 36  | 7.45E-09  | 34  |
| NNU_29136 | 904  | NNU_001743 | 4168 | 0.84 | 495 | 5.94E-129 | 249 |
| NNU_29138 | 2033 | NNU_001780 | 600  | 0.78 | 364 | 1.17E-54  | 116 |
| NNU_29138 | 2033 | NNU_011824 | 2591 | 0.78 | 197 | 4.37E-24  | 61  |
| NNU_29139 | 1338 | NNU_018685 | 1431 | 0.89 | 222 | 9.59E-74  | 150 |
| NNU_29139 | 1338 | NNU_005096 | 297  | 0.87 | 222 | 7.52E-65  | 134 |
| NNU_29139 | 1338 | NNU_022055 | 324  | 0.95 | 37  | 3.78E-08  | 32  |
| NNU_29140 | 3654 | NNU_024819 | 366  | 1.00 | 58  | 1.02E-22  | 59  |
| NNU_29140 | 3654 | NNU_023316 | 441  | 0.96 | 54  | 3.70E-17  | 49  |
| NNU_29140 | 3654 | NNU_015040 | 1307 | 0.95 | 97  | 4.65E-36  | 83  |
| NNU_29140 | 3654 | NNU_015631 | 243  | 1.00 | 29  | 1.35E-06  | 30  |
| NNU_29141 | 1190 | NNU_008874 | 477  | 0.89 | 366 | 2.19E-129 | 250 |
| NNU_29142 | 4015 | NNU_017499 | 1205 | 0.89 | 62  | 3.17E-13  | 42  |
| NNU_29142 | 4015 | NNU_009390 | 1363 | 0.89 | 62  | 3.17E-13  | 42  |
| NNU_29144 | 902  | NNU_016507 | 1238 | 0.91 | 64  | 1.16E-16  | 47  |
| NNU_29144 | 902  | NNU_009451 | 3613 | 0.86 | 79  | 1.16E-16  | 47  |
| NNU_29144 | 902  | NNU_013492 | 2276 | 0.90 | 60  | 1.94E-14  | 43  |
| NNU_29144 | 902  | NNU_000605 | 1684 | 0.90 | 60  | 1.94E-14  | 43  |
| NNU_29144 | 902  | NNU_015993 | 3325 | 0.93 | 53  | 6.98E-14  | 42  |
| NNU_29144 | 902  | NNU_005729 | 1706 | 0.88 | 56  | 1.51E-10  | 36  |
| NNU_29144 | 902  | NNU_004797 | 1906 | 0.88 | 50  | 2.53E-08  | 32  |
| NNU_29149 | 918  | NNU_026028 | 2517 | 0.88 | 208 | 5.12E-65  | 134 |
| NNU_29149 | 918  | NNU_000028 | 1170 | 0.92 | 200 | 2.35E-73  | 149 |
| NNU_29152 | 326  | NNU_003570 | 1390 | 0.92 | 85  | 1.09E-27  | 66  |
| NNU_29152 | 326  | NNU_008540 | 870  | 1.00 | 50  | 2.39E-19  | 51  |
| NNU_29152 | 326  | NNU_026530 | 621  | 0.97 | 35  | 2.42E-09  | 33  |
| NNU_29152 | 326  | NNU_026542 | 1563 | 1.00 | 31  | 8.71E-09  | 32  |
| NNU_29152 | 326  | NNU_014667 | 468  | 1.00 | 31  | 8.71E-09  | 32  |
| NNU_29152 | 326  | NNU_014546 | 1752 | 1.00 | 31  | 8.71E-09  | 32  |
| NNU_29156 | 2126 | NNU_020540 | 843  | 0.91 | 172 | 4.35E-59  | 124 |
| NNU_29156 | 2126 | NNU_003804 | 3759 | 0.89 | 154 | 4.42E-49  | 106 |



|           |      |            |       |      |     |           |     |
|-----------|------|------------|-------|------|-----|-----------|-----|
| NNU_29156 | 2126 | NNU_017467 | 1667  | 0.98 | 95  | 3.46E-40  | 90  |
| NNU_29156 | 2126 | NNU_014170 | 1245  | 0.92 | 117 | 4.48E-39  | 88  |
| NNU_29156 | 2126 | NNU_023675 | 3348  | 0.94 | 49  | 6.00E-13  | 41  |
| NNU_29156 | 2126 | NNU_020594 | 1389  | 0.84 | 77  | 6.00E-13  | 41  |
| NNU_29157 | 9117 | NNU_017520 | 813   | 0.88 | 83  | 1.54E-19  | 54  |
| NNU_29159 | 969  | NNU_004127 | 3180  | 0.93 | 174 | 8.99E-68  | 139 |
| NNU_29166 | 1831 | NNU_017895 | 2776  | 0.99 | 82  | 1.08E-34  | 80  |
| NNU_29166 | 1831 | NNU_016300 | 347   | 0.96 | 88  | 5.02E-33  | 77  |
| NNU_29169 | 965  | NNU_010140 | 3276  | 0.97 | 32  | 3.50E-07  | 30  |
| NNU_29170 | 671  | NNU_004589 | 3138  | 0.97 | 157 | 3.67E-70  | 143 |
| NNU_29173 | 1932 | NNU_004610 | 768   | 0.78 | 197 | 4.15E-24  | 61  |
| NNU_29174 | 4684 | NNU_011943 | 1718  | 0.82 | 77  | 8.01E-10  | 36  |
| NNU_29175 | 3010 | NNU_004635 | 636   | 0.92 | 142 | 3.75E-51  | 110 |
| NNU_29179 | 3905 | NNU_004670 | 1551  | 0.91 | 110 | 6.44E-35  | 81  |
| NNU_29180 | 2185 | NNU_026090 | 1197  | 0.84 | 208 | 7.60E-47  | 102 |
| NNU_29180 | 2185 | NNU_010557 | 1044  | 0.83 | 175 | 3.59E-35  | 81  |
| NNU_29180 | 2185 | NNU_015333 | 783   | 0.80 | 207 | 4.64E-34  | 79  |
| NNU_29180 | 2185 | NNU_013168 | 3900  | 0.88 | 55  | 1.03E-10  | 37  |
| NNU_29181 | 787  | NNU_024089 | 966   | 0.95 | 57  | 7.78E-18  | 49  |
| NNU_29181 | 787  | NNU_009077 | 111   | 0.97 | 58  | 4.65E-20  | 53  |
| NNU_29182 | 972  | NNU_005364 | 2328  | 0.96 | 98  | 7.27E-39  | 87  |
| NNU_29182 | 972  | NNU_000654 | 354   | 0.96 | 91  | 2.04E-34  | 79  |
| NNU_29182 | 972  | NNU_009472 | 1173  | 0.92 | 77  | 2.67E-23  | 59  |
| NNU_29182 | 972  | NNU_014622 | 1068  | 0.97 | 38  | 1.63E-10  | 36  |
| NNU_29183 | 2209 | NNU_004037 | 735   | 1.00 | 29  | 8.13E-07  | 30  |
| NNU_29186 | 672  | NNU_025820 | 1162  | 0.82 | 292 | 1.72E-63  | 131 |
| NNU_29186 | 672  | NNU_006230 | 2901  | 0.90 | 211 | 7.91E-72  | 146 |
| NNU_29186 | 672  | NNU_021602 | 945   | 0.94 | 49  | 6.66E-13  | 40  |
| NNU_29188 | 4748 | NNU_022951 | 4362  | 0.96 | 44  | 1.74E-11  | 39  |
| NNU_29190 | 1688 | NNU_026227 | 994   | 0.92 | 327 | 8.74E-125 | 242 |
| NNU_29190 | 1688 | NNU_009192 | 1273  | 0.84 | 185 | 2.74E-40  | 90  |
| NNU_29190 | 1688 | NNU_012538 | 1999  | 0.88 | 93  | 1.68E-22  | 58  |
| NNU_29192 | 1495 | NNU_003217 | 2653  | 0.92 | 49  | 1.95E-11  | 38  |
| NNU_29192 | 1495 | NNU_026673 | 1164  | 0.97 | 107 | 2.41E-45  | 99  |
| NNU_29193 | 3418 | NNU_007427 | 2543  | 0.96 | 45  | 3.48E-12  | 40  |
| NNU_29197 | 2051 | NNU_009484 | 1896  | 0.93 | 384 | 1.68E-162 | 310 |
| NNU_29198 | 7061 | NNU_009336 | 1949  | 0.86 | 144 | 9.02E-36  | 83  |
| NNU_29201 | 4886 | NNU_019568 | 10194 | 0.86 | 147 | 4.82E-37  | 85  |
| NNU_29203 | 741  | NNU_002467 | 1555  | 1.00 | 44  | 1.22E-15  | 45  |
| NNU_29208 | 1357 | NNU_012594 | 3874  | 0.90 | 182 | 9.94E-59  | 123 |
| NNU_29208 | 1357 | NNU_025026 | 399   | 0.98 | 49  | 1.76E-16  | 47  |
| NNU_29209 | 1582 | NNU_015984 | 1047  | 0.96 | 106 | 4.26E-43  | 95  |
| NNU_29209 | 1582 | NNU_014851 | 3748  | 0.96 | 91  | 9.29E-35  | 80  |
| NNU_29209 | 1582 | NNU_012246 | 474   | 1.00 | 35  | 2.68E-10  | 36  |

|           |      |            |      |      |     |           |     |
|-----------|------|------------|------|------|-----|-----------|-----|
| NNU_29209 | 1582 | NNU_002736 | 601  | 1.00 | 30  | 1.61E-07  | 31  |
| NNU_29209 | 1582 | NNU_006493 | 318  | 1.00 | 30  | 1.61E-07  | 31  |
| NNU_29217 | 315  | NNU_020291 | 428  | 0.96 | 135 | 1.31E-56  | 118 |
| NNU_29217 | 315  | NNU_026316 | 544  | 0.96 | 105 | 7.98E-44  | 95  |
| NNU_29219 | 1274 | NNU_012973 | 1968 | 0.94 | 416 | 1.02E-177 | 337 |
| NNU_29219 | 1274 | NNU_018618 | 1264 | 0.96 | 140 | 9.32E-59  | 123 |
| NNU_29222 | 1317 | NNU_020169 | 1194 | 0.87 | 179 | 5.84E-51  | 109 |
| NNU_29222 | 1317 | NNU_026380 | 813  | 0.77 | 286 | 3.57E-38  | 86  |
| NNU_29223 | 1523 | NNU_016314 | 519  | 0.92 | 267 | 4.87E-102 | 201 |
| NNU_29228 | 1480 | NNU_004621 | 633  | 0.89 | 632 | 0         | 417 |
| NNU_29229 | 487  | NNU_018019 | 1899 | 0.98 | 96  | 1.64E-42  | 93  |
| NNU_29238 | 1372 | NNU_026083 | 1558 | 0.84 | 316 | 2.10E-80  | 162 |
| NNU_29239 | 1055 | NNU_013963 | 1894 | 0.93 | 102 | 4.76E-36  | 82  |
| NNU_29241 | 2573 | NNU_000633 | 1232 | 0.98 | 89  | 9.09E-37  | 84  |
| NNU_29241 | 2573 | NNU_000634 | 778  | 0.85 | 125 | 5.51E-29  | 70  |
| NNU_29245 | 1153 | NNU_007106 | 4644 | 0.94 | 111 | 5.17E-41  | 91  |
| NNU_29246 | 834  | NNU_010543 | 351  | 0.91 | 191 | 2.77E-67  | 138 |
| NNU_29247 | 4417 | NNU_000875 | 543  | 0.94 | 106 | 2.60E-39  | 89  |
| NNU_29247 | 4417 | NNU_012344 | 2709 | 0.93 | 152 | 1.52E-56  | 120 |
| NNU_29247 | 4417 | NNU_005747 | 2132 | 0.92 | 256 | 2.39E-99  | 197 |
| NNU_29247 | 4417 | NNU_022019 | 2538 | 0.98 | 53  | 3.46E-18  | 51  |
| NNU_29248 | 1176 | NNU_010647 | 426  | 0.80 | 95  | 1.98E-10  | 36  |
| NNU_29249 | 894  | NNU_000371 | 1218 | 0.93 | 106 | 2.40E-38  | 86  |
| NNU_29249 | 894  | NNU_017712 | 357  | 0.92 | 82  | 5.27E-25  | 62  |
| NNU_29252 | 1920 | NNU_004250 | 3927 | 0.95 | 255 | 1.02E-109 | 215 |
| NNU_29256 | 974  | NNU_025864 | 1555 | 0.92 | 237 | 4.06E-91  | 181 |
| NNU_29257 | 3244 | NNU_018324 | 1794 | 0.94 | 491 | 0         | 402 |
| NNU_29266 | 719  | NNU_023908 | 1740 | 0.92 | 151 | 4.03E-55  | 116 |
| NNU_29268 | 5780 | NNU_021683 | 2319 | 0.91 | 196 | 3.27E-69  | 143 |
| NNU_29268 | 5780 | NNU_006591 | 5446 | 0.88 | 358 | 1.83E-116 | 228 |
| NNU_29268 | 5780 | NNU_012719 | 3170 | 0.85 | 70  | 7.65E-11  | 38  |
| NNU_29268 | 5780 | NNU_026398 | 4103 | 0.88 | 51  | 1.66E-07  | 32  |
| NNU_29269 | 2906 | NNU_017173 | 1632 | 1.00 | 51  | 6.32E-19  | 52  |
| NNU_29272 | 700  | NNU_019062 | 1796 | 0.80 | 194 | 3.14E-31  | 73  |
| NNU_29272 | 700  | NNU_004508 | 1725 | 0.91 | 110 | 1.12E-35  | 81  |
| NNU_29272 | 700  | NNU_006099 | 739  | 0.80 | 118 | 3.21E-16  | 46  |
| NNU_29273 | 1922 | NNU_022414 | 2268 | 0.87 | 535 | 9.42E-165 | 314 |
| NNU_29273 | 1922 | NNU_005197 | 4773 | 0.90 | 136 | 5.19E-43  | 95  |
| NNU_29273 | 1922 | NNU_001211 | 942  | 0.82 | 145 | 2.47E-26  | 65  |
| NNU_29275 | 2099 | NNU_020203 | 1503 | 0.85 | 634 | 0         | 345 |
| NNU_29276 | 695  | NNU_002233 | 234  | 0.88 | 111 | 3.12E-31  | 73  |
| NNU_29276 | 695  | NNU_012311 | 1306 | 0.88 | 56  | 1.15E-10  | 36  |
| NNU_29280 | 623  | NNU_025504 | 1083 | 0.90 | 101 | 1.00E-30  | 72  |
| NNU_29281 | 2561 | NNU_011902 | 1518 | 0.93 | 89  | 4.24E-30  | 72  |

|           |      |            |      |      |      |           |     |
|-----------|------|------------|------|------|------|-----------|-----|
| NNU_29283 | 1322 | NNU_001468 | 1254 | 0.93 | 70   | 1.70E-21  | 56  |
| NNU_29283 | 1322 | NNU_000192 | 2034 | 0.94 | 51   | 2.87E-14  | 43  |
| NNU_29285 | 6183 | NNU_025760 | 258  | 0.83 | 197  | 1.69E-42  | 95  |
| NNU_29285 | 6183 | NNU_003003 | 1269 | 0.94 | 52   | 3.78E-14  | 44  |
| NNU_29289 | 794  | NNU_020528 | 1017 | 0.91 | 42   | 7.97E-08  | 31  |
| NNU_29291 | 2856 | NNU_015625 | 3082 | 0.78 | 1955 | 0         | 655 |
| NNU_29292 | 783  | NNU_014832 | 633  | 0.97 | 33   | 7.85E-08  | 31  |
| NNU_29293 | 8113 | NNU_014877 | 1511 | 0.96 | 97   | 2.23E-37  | 86  |
| NNU_29293 | 8113 | NNU_012469 | 4775 | 0.78 | 200  | 1.76E-23  | 61  |
| NNU_29298 | 2669 | NNU_019652 | 1451 | 0.87 | 143  | 3.39E-36  | 83  |
| NNU_29300 | 2112 | NNU_021104 | 930  | 0.90 | 384  | 1.80E-137 | 265 |
| NNU_29300 | 2112 | NNU_009096 | 952  | 0.98 | 45   | 4.61E-14  | 43  |
| NNU_29300 | 2112 | NNU_025660 | 459  | 0.94 | 110  | 9.56E-41  | 91  |
| NNU_29301 | 1963 | NNU_018264 | 264  | 0.91 | 163  | 3.13E-55  | 117 |
| NNU_29301 | 1963 | NNU_009779 | 3297 | 0.99 | 124  | 5.20E-58  | 122 |
| NNU_29302 | 435  | NNU_004878 | 2286 | 0.97 | 371  | 1.56E-176 | 334 |
| NNU_29310 | 1092 | NNU_026304 | 1101 | 0.91 | 201  | 4.69E-71  | 145 |
| NNU_29310 | 1092 | NNU_009903 | 666  | 0.89 | 80   | 1.81E-20  | 54  |
| NNU_29313 | 1370 | NNU_004749 | 1540 | 0.98 | 197  | 2.05E-95  | 189 |
| NNU_29313 | 1370 | NNU_024236 | 1095 | 0.90 | 132  | 6.17E-41  | 91  |
| NNU_29314 | 561  | NNU_005346 | 635  | 0.88 | 119  | 1.93E-32  | 75  |
| NNU_29317 | 1586 | NNU_019371 | 2087 | 0.92 | 671  | 0         | 523 |
| NNU_29317 | 1586 | NNU_013117 | 2635 | 0.77 | 613  | 3.12E-84  | 169 |
| NNU_29320 | 607  | NNU_009422 | 968  | 0.98 | 47   | 9.95E-16  | 45  |
| NNU_29321 | 2838 | NNU_023528 | 4032 | 0.94 | 77   | 4.74E-25  | 63  |
| NNU_29321 | 2838 | NNU_000969 | 1502 | 1.00 | 30   | 2.91E-07  | 31  |
| NNU_29323 | 559  | NNU_022682 | 627  | 0.92 | 83   | 9.02E-26  | 63  |
| NNU_29324 | 948  | NNU_007644 | 517  | 0.97 | 118  | 5.40E-50  | 107 |
| NNU_29326 | 2821 | NNU_026347 | 2289 | 0.87 | 183  | 7.55E-53  | 113 |
| NNU_29330 | 744  | NNU_011498 | 2767 | 0.95 | 421  | 0         | 354 |
| NNU_29332 | 3515 | NNU_025786 | 2578 | 0.83 | 364  | 1.15E-91  | 183 |
| NNU_29332 | 3515 | NNU_006709 | 3256 | 0.84 | 318  | 9.02E-83  | 167 |
| NNU_29332 | 3515 | NNU_024899 | 3722 | 0.83 | 156  | 2.71E-28  | 69  |
| NNU_29332 | 3515 | NNU_006009 | 2228 | 0.82 | 141  | 2.73E-23  | 60  |
| NNU_29332 | 3515 | NNU_001676 | 1042 | 0.88 | 77   | 9.89E-18  | 50  |
| NNU_29332 | 3515 | NNU_014577 | 3299 | 0.85 | 87   | 1.66E-15  | 46  |
| NNU_29335 | 1130 | NNU_001221 | 2794 | 0.93 | 97   | 3.07E-33  | 77  |
| NNU_29335 | 1130 | NNU_014549 | 447  | 1.00 | 30   | 1.14E-07  | 31  |
| NNU_29344 | 1308 | NNU_010871 | 501  | 0.90 | 134  | 9.78E-44  | 96  |
| NNU_29345 | 9345 | NNU_007455 | 543  | 0.95 | 58   | 2.64E-17  | 50  |
| NNU_29350 | 6114 | NNU_004520 | 2153 | 0.81 | 651  | 6.68E-146 | 281 |
| NNU_29351 | 3189 | NNU_017421 | 4857 | 0.95 | 376  | 1.56E-169 | 323 |
| NNU_29351 | 3189 | NNU_001329 | 4100 | 0.79 | 235  | 1.46E-35  | 82  |
| NNU_29351 | 3189 | NNU_025289 | 1250 | 0.81 | 124  | 1.93E-19  | 53  |

|           |      |            |      |      |      |           |     |
|-----------|------|------------|------|------|------|-----------|-----|
| NNU_29351 | 3189 | NNU_020222 | 482  | 0.94 | 48   | 3.25E-12  | 40  |
| NNU_29352 | 793  | NNU_003938 | 1461 | 0.89 | 140  | 5.85E-44  | 96  |
| NNU_29361 | 1739 | NNU_015423 | 1853 | 0.90 | 403  | 2.43E-145 | 279 |
| NNU_29361 | 1739 | NNU_005718 | 985  | 0.80 | 139  | 2.25E-21  | 56  |
| NNU_29362 | 1305 | NNU_005563 | 1350 | 0.84 | 631  | 1.38E-161 | 308 |
| NNU_29364 | 938  | NNU_002559 | 3905 | 0.89 | 103  | 1.98E-29  | 70  |
| NNU_29366 | 130  | NNU_014546 | 1752 | 0.95 | 129  | 1.04E-53  | 112 |
| NNU_29366 | 130  | NNU_026531 | 427  | 0.96 | 51   | 5.09E-17  | 46  |
| NNU_29366 | 130  | NNU_026530 | 621  | 0.94 | 49   | 3.07E-14  | 41  |
| NNU_29367 | 450  | NNU_017839 | 1534 | 0.82 | 272  | 5.29E-62  | 128 |
| NNU_29367 | 450  | NNU_014546 | 1752 | 0.94 | 148  | 1.14E-58  | 122 |
| NNU_29367 | 450  | NNU_026530 | 621  | 0.93 | 152  | 1.48E-57  | 120 |
| NNU_29367 | 450  | NNU_014547 | 303  | 0.93 | 146  | 3.20E-54  | 114 |
| NNU_29368 | 1880 | NNU_019044 | 1572 | 0.84 | 1453 | 0         | 723 |
| NNU_29370 | 683  | NNU_019099 | 845  | 0.86 | 440  | 1.60E-128 | 248 |
| NNU_29370 | 683  | NNU_019100 | 1079 | 0.81 | 244  | 2.32E-47  | 102 |
| NNU_29370 | 683  | NNU_019101 | 295  | 0.93 | 140  | 2.30E-52  | 111 |
| NNU_29371 | 4177 | NNU_020395 | 3471 | 0.90 | 215  | 2.34E-74  | 152 |
| NNU_29372 | 899  | NNU_015767 | 492  | 0.90 | 62   | 5.37E-15  | 44  |
| NNU_29372 | 899  | NNU_004531 | 810  | 0.93 | 54   | 1.93E-14  | 43  |
| NNU_29376 | 1537 | NNU_015680 | 1016 | 0.86 | 479  | 4.65E-142 | 273 |
| NNU_29376 | 1537 | NNU_015681 | 402  | 0.90 | 311  | 4.85E-112 | 219 |
| NNU_29378 | 1501 | NNU_014059 | 3731 | 0.94 | 246  | 6.21E-101 | 199 |
| NNU_29384 | 1744 | NNU_020613 | 1272 | 0.97 | 71   | 2.24E-26  | 65  |
| NNU_29387 | 730  | NNU_008816 | 1634 | 0.90 | 166  | 1.47E-54  | 115 |
| NNU_29388 | 644  | NNU_016191 | 5081 | 0.99 | 76   | 8.01E-32  | 74  |
| NNU_29388 | 644  | NNU_019690 | 4259 | 0.94 | 76   | 3.75E-25  | 62  |
| NNU_29389 | 2270 | NNU_010348 | 1364 | 0.90 | 76   | 1.37E-19  | 53  |
| NNU_29391 | 1905 | NNU_007198 | 2560 | 0.93 | 44   | 3.23E-10  | 36  |
| NNU_29392 | 1628 | NNU_001966 | 2250 | 0.96 | 134  | 2.59E-55  | 117 |
| NNU_29392 | 1628 | NNU_017023 | 807  | 0.95 | 134  | 1.20E-53  | 114 |
| NNU_29392 | 1628 | NNU_024752 | 1557 | 0.94 | 134  | 5.60E-52  | 111 |
| NNU_29396 | 1625 | NNU_001966 | 2250 | 1.00 | 51   | 3.51E-19  | 52  |
| NNU_29396 | 1625 | NNU_017023 | 807  | 0.96 | 51   | 7.59E-16  | 46  |
| NNU_29396 | 1625 | NNU_024752 | 1557 | 0.96 | 51   | 7.59E-16  | 46  |
| NNU_29398 | 1356 | NNU_005030 | 1311 | 0.80 | 410  | 3.47E-78  | 158 |
| NNU_29399 | 734  | NNU_020099 | 2018 | 0.86 | 148  | 2.53E-37  | 84  |

---

**Table S3. Comparison of the expression of 14 common genes between our study and the previous study of Cheng et al. <sup>10</sup> who analyzed transcript profiling of lotus rhizome by sequence tag counting technology**

| Gene name                                     | Gene ID   | R <sup>1</sup> | P value | Significance <sup>2</sup> |
|-----------------------------------------------|-----------|----------------|---------|---------------------------|
| <i>APETALA AP2</i>                            | NNU_17043 | 0.99           | 0.009   | **                        |
| <i>Cycling Dof Factor DOF</i>                 | NNU_12021 | 0.95           | 0.02    | *                         |
| <i>Granule-Bound Starch Synthase GBSS</i>     | NNU_07282 | 0.62           | 0.57    | N                         |
| <i>MADS-box transcription factor AGL8</i>     | NNU_04430 | 0.44           | 0.71    | N                         |
| <i>Glucose pyrophosphorylase AGPase</i>       | NNU_11690 | 0.21           | 0.86    | N                         |
| <i>GA 20-oxidase</i>                          | NNU_07907 | 0.14           | 0.9     | N                         |
| <i>Zinc finger CONSTANS-like protein COL</i>  | NNU_22255 | 0.07           | 0.96    | N                         |
| <i>Calmodulin-like protein</i>                | NNU_17533 | -0.01          | 0.99    | N                         |
| <i>GIGANTEA GI</i>                            | NNU_20074 | -0.4           | 0.75    | N                         |
| <i>Sucrose synthase SUS</i>                   | NNU_05767 | -0.4           | 0.74    | N                         |
| <i>Phytochrome B PHYB</i>                     | NNU_08548 | -0.98          | 0.11    | N                         |
| <i>Lipoxygenase</i>                           | NNU_06221 | -0.99          | 0.006   | **                        |
| <i>BEL1-like HD transcription factor BEL1</i> | NNU_05289 | -0.99          | 0.003   | *                         |

<sup>1</sup>The correlation coefficient of the expression between the two study;

<sup>2</sup>The significant level: N, no significance; \*,  $P = 0.05$ ; \*\*,  $P = 0.01$ .

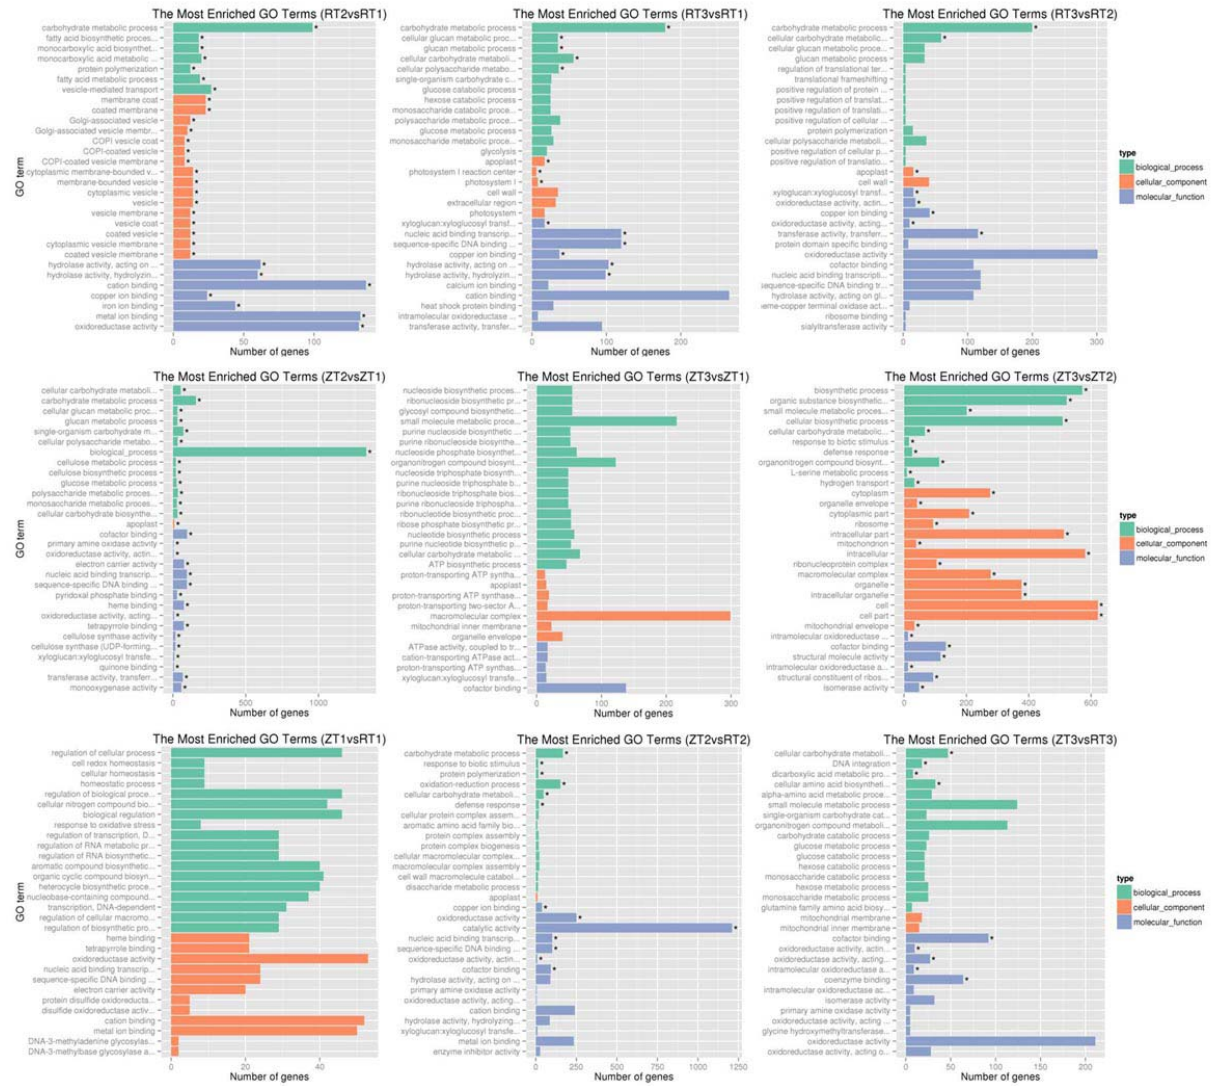

**Figure S1. GO terms significantly enriched in DEGs in comparisons of RT1, RT2, RT3, ZT1, ZT2, and ZT3 libraries.**

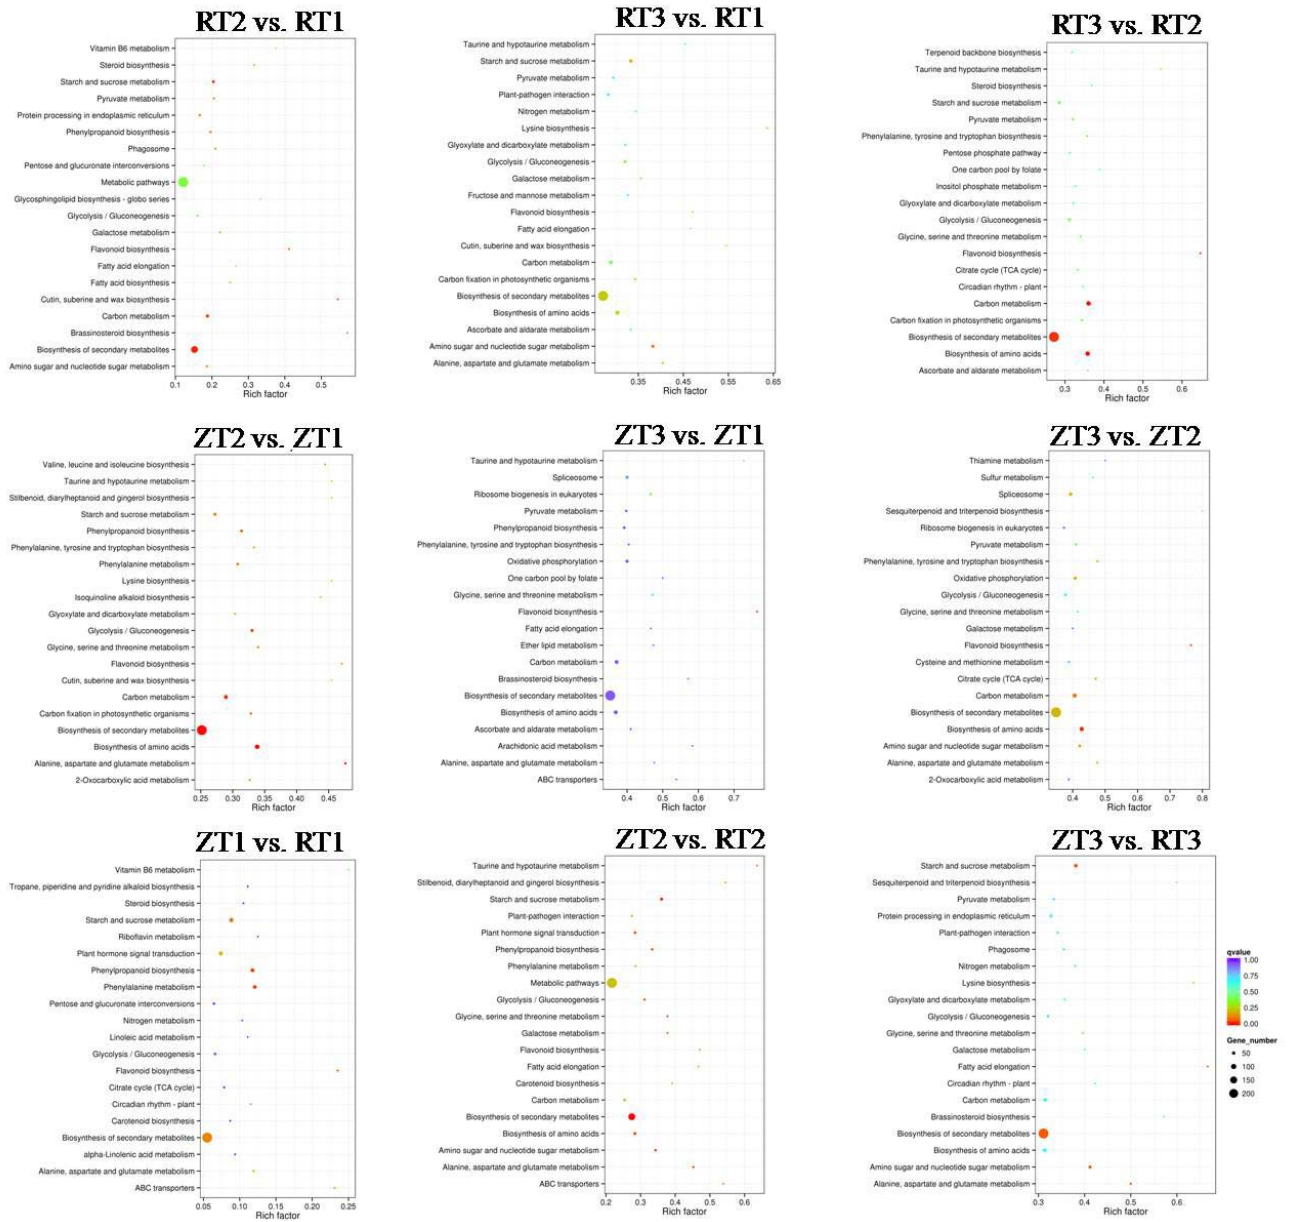

**Figure S2. KEGG pathways significantly enriched in DEGs in comparisons of RT1, RT2, RT3,**

**ZT1, ZT2, and ZT3 libraries.**

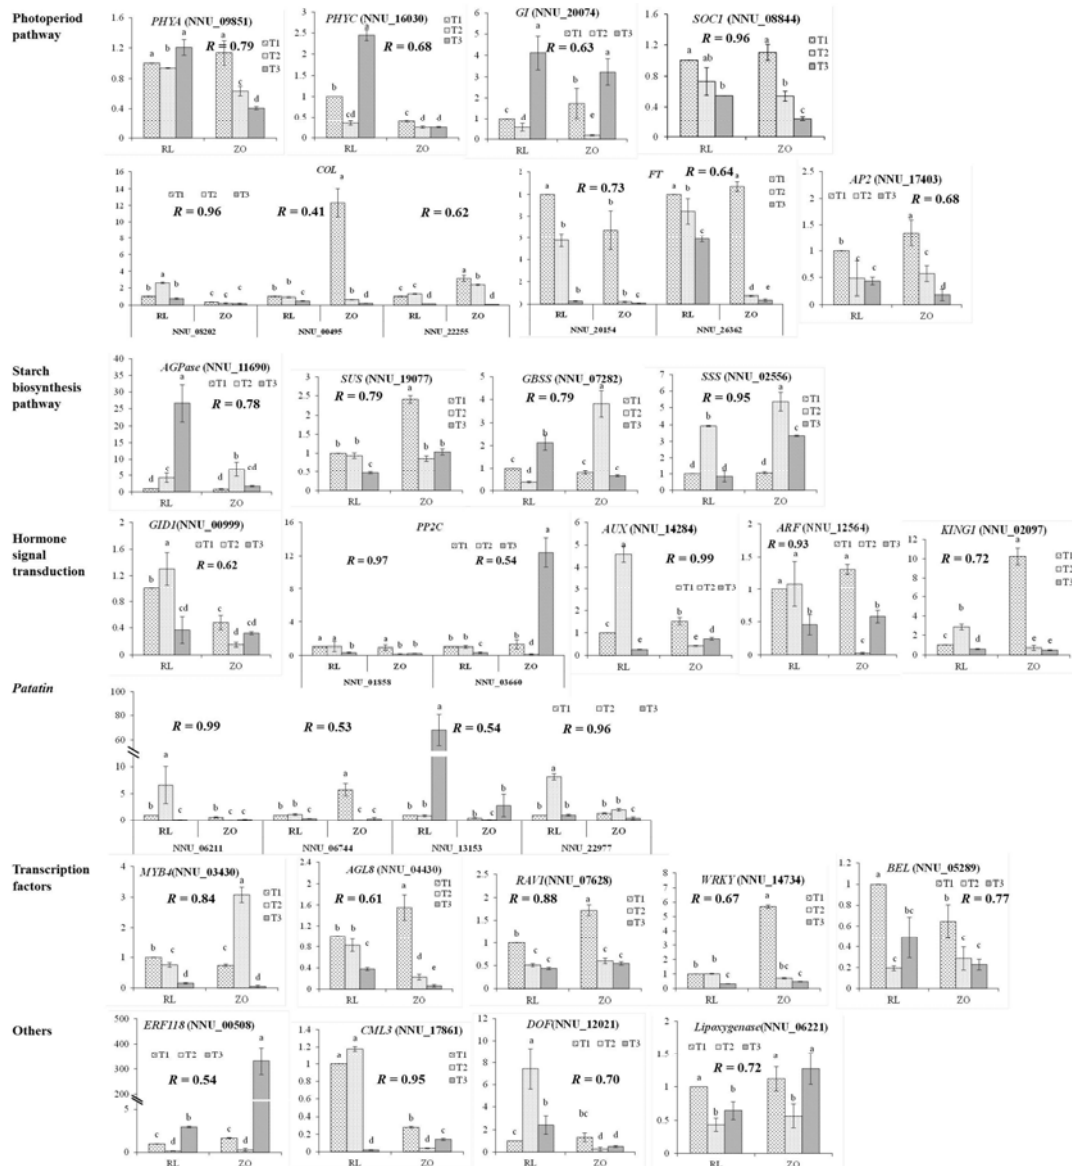

**Figure S3. Real-time quantitative RT-qPCR validation of 31 genes expressed at the three stages, T1, T2, and T3, between the two cultivars, 'RL' and 'ZO'. The left y-axis indicates relative gene expression levels determined by RT-qPCR. Data were normalized against a lotus  $\beta$ -actin gene (NNU\_24864) and analyzed using the  $2^{-\Delta\Delta C_T}$  Method. The expression values were adjusted by setting the expression of RT1 to be 1 for each gene. All RT-qPCRs for each gene used three biological replicates, with three technical replicates per experiment; the error bars indicate SE. Different lower case letter (a, b, c, d, e) indicates the significant difference among six treatments at  $P = 0.05$ . The correlation coefficient ( $R$ ) between the RT-qPCR and RNA-Seq data is shown for each gene.**
